# Supplementary material for: High-fidelity neural speech reconstruction through an efficient acoustic-linguistic dual-pathway framework
Source: eLife. 2026 Mar 5;14:RP109400. doi: 10.7554/eLife.109400 (PMC12962650; doi:10.7554/eLife.109400)
Supplement: Source data 1. [file elife-109400-data1.xlsx]

## Sheet: fig2,3,S3
melspec r2
ours									baseline1									baseline2									baseline3
Participant1	Participant2	Participant3	Participant4	Participant5	Participant6	Participant7	Participant8	Participant9	Participant1	Participant2	Participant3	Participant4	Participant5	Participant6	Participant7	Participant8	Participant9	Participant1	Participant2	Participant3	Participant4	Participant5	Participant6	Participant7	Participant8	Participant9	Participant1	Participant2	Participant3	Participant4	Participant5	Participant6	Participant7	Participant8	Participant9
0.911455	0.836101	0.635154	0.769119	0.702136	0.777491	0.932	0.844473	0.928201	0.7638	0.60394	0.674596	0.782945	0.816371	0.707602	0.773358	0.7614	0.739164	0.706617	0.832506	0.62893	0.714533	0.812787	0.717782	0.680379	0.815701	0.942703	0.543061	0.710082	0.484791	0.772178	0.55321	0.686318	0.599812	0.645545	0.611874
0.861219	0.944946	0.886337	0.953319	0.760746	0.89471	0.8634	0.903083	0.584918	0.7341	0.68651	0.656402	0.688127	0.635955	0.682208	0.748949	0.766137	0.663754	0.737897	0.819093	0.847344	0.772108	0.83304	0.828456	0.621208	0.899975	0.78777	0.591801	0.770383	0.694224	0.703247	0.805409	0.425258	0.582216	0.487108	0.628427
0.769119	0.744	0.89471	0.928201	0.810982	0.911455	0.8912	0.886337	0.827728	0.7377	0.624721	0.731272	0.751543	0.68391	0.699449	0.711316	0.801579	0.758152	0.735078	0.890677	0.781794	0.83452	0.733473	0.899122	0.726385	0.88833	0.779127	0.7336	0.593908	0.616479	0.551554	0.489583	0.682556	0.569883	0.628617	0.724644
0.936574	0.208144	0.852846	0.836101	0.852846	0.911455	0.6684	0.852846	0.425836	0.6512	0.733875	0.770453	0.673552	0.689304	0.689327	0.617512	0.676952	0.671465	0.843893	0.775078	0.706487	0.816322	0.953819	0.697313	0.829964	0.84085	0.782028	0.651774	0.572917	0.729123	0.724102	0.71799	0.561616	0.673896	0.517378	0.547284
0.718882	0.903083	0.852846	0.702136	0.810982	0.886337	0.876	0.760746	0.944946	0.6791	0.744831	0.710223	0.714895	0.636338	0.720528	0.778931	0.672832	0.703393	0.764342	0.868362	0.954453	0.727146	0.811106	0.812107	0.877141	0.764536	0.762287	0.457722	0.498899	0.665203	0.468962	0.593984	0.691316	0.721133	0.611549	0.438591
0.769119	0.911455	0.727255	0.785864	0.635154	0.877964	0.3672	0.836101	0.89471	0.7903	0.652152	0.641178	0.727299	0.784723	0.801035	0.72757	0.710361	0.673471	0.88099	0.799447	0.825318	0.830164	0.776564	0.880114	0.613925	0.76615	0.721869	0.630248	0.628252	0.647683	0.527027	0.774906	0.797469	0.686954	0.784096	0.611024
0.89471	0.89471	0.886337	0.944946	0.735627	0.903083	0.7455	0.886337	0.844473	0.6858	0.748633	0.873883	0.677927	0.683151	0.764771	0.75734	0.697013	0.735666	0.841586	0.90983	0.858851	0.761791	0.736923	0.828962	0.774158	0.808541	0.901667	0.532921	0.581276	0.74649	0.640906	0.73432	0.532752	0.723712	0.699727	0.59749
0.852846	0.89471	0.911455	0.810982	0.89471	0.836101	0.9169	0.769119	0.886337	0.7014	0.676436	0.728301	0.760025	0.738825	0.793311	0.764955	0.754886	0.724519	0.792788	0.854363	0.923678	0.757904	0.745454	0.800475	0.798585	0.841369	0.797017	0.605848	0.769078	0.59755	0.788886	0.534322	0.656898	0.6059	0.769664	0.433807
0.877964	0.869592	0.928201	0.769119	0.794237	0.668645	0.8183	0.852846	0.886337	0.7573	0.796477	0.600269	0.75319	0.768443	0.770665	0.767394	0.702276	0.6486	0.724285	0.7313	0.855682	0.713793	0.716806	0.734553	0.844799	0.81682	0.86134	0.554439	0.603542	0.764101	0.79093	0.519713	0.5426	0.582425	0.530209	0.794259
0.869592	0.89471	0.869592	0.903083	0.869592	0.970065	0.8948	0.660273	0.568172	0.7502	0.774282	0.7693	0.758063	0.799651	0.759038	0.730806	0.731498	0.735493	0.78138	0.793464	0.826879	0.79729	0.703974	0.815285	0.916353	0.804392	0.770454	0.562272	0.683122	0.720256	0.716615	0.476618	0.679708	0.881245	0.690021	0.667007
0.827728	0.844473	0.819355	0.911455	0.886337	0.911455	0.7436	0.727255	0.685391	0.7261	0.741205	0.810992	0.755468	0.747958	0.721191	0.711245	0.714893	0.778878	0.749899	0.69604	0.9312	0.750951	0.94066	0.682195	0.815848	0.799992	0.651682	0.596338	0.714323	0.740372	0.698396	0.433528	0.549353	0.589038	0.705858	0.528315
0.903083	0.635154	0.869592	0.869592	0.928201	0.852846	0.7459	0.911455	0.861219	0.6366	0.754306	0.718843	0.699794	0.803066	0.683122	0.707771	0.709421	0.765515	0.781531	0.72953	0.802507	0.728379	0.854082	0.846995	0.901925	0.784723	0.848675	0.362529	0.633318	0.477302	0.827664	0.752786	0.424138	0.62629	0.750857	0.754716
0.810982	0.693764	0.877964	0.769119	0.476072	0.911455	0.9121	0.903083	0.810982	0.6923	0.747515	0.766966	0.76202	0.774053	0.6919	0.807214	0.771164	0.688789	0.823202	0.692651	0.719637	0.778817	0.844591	0.730234	0.808257	0.866823	0.845582	0.616369	0.539635	0.646112	0.551029	0.388112	0.878595	0.670097	0.694483	0.653602
0.911455	0.827728	0.89471	0.903083	0.844473	0.342108	0.6935	0.777491	0.727255	0.7016	0.712194	0.662236	0.687552	0.782531	0.725313	0.64273	0.718834	0.646207	0.719608	0.83581	0.671798	0.737303	0.930506	0.742182	0.763123	0.766034	0.790751	0.500897	0.467721	0.571637	0.734319	0.683293	0.689379	0.60132	0.900406	0.770409
0.919828	0.836101	0.936574	0.827728	0.911455	0.827728	0.882	0.819355	0.744	0.7126	0.598486	0.764133	0.749267	0.775037	0.750889	0.761926	0.718293	0.737531	0.791388	0.861523	0.846206	0.916415	0.769023	0.810581	0.833185	0.743327	0.799468	0.723466	0.699177	0.735072	0.538737	0.624866	0.620949	0.804788	0.347829	0.508063
0.919828	0.944946	0.80261	0.89471	0.844473	0.928201	0.9322	0.928201	0.961692	0.7239	0.699183	0.710066	0.821059	0.749737	0.710065	0.729365	0.68288	0.742832	0.809166	0.81397	0.802666	0.89275	0.728869	0.810625	0.785474	0.735476	0.943937	0.461568	0.4948	0.454109	0.760422	0.745296	0.456135	0.473809	0.625687	0.469703
0.861219	0.936574	0.877964	0.702136	0.735627	0.836101	0.8928	0.919828	0.794237	0.8121	0.734722	0.71637	0.75261	0.665475	0.726268	0.765641	0.6548	0.751208	0.818866	0.8439	0.741392	0.697634	0.800309	0.69449	0.824579	0.689163	0.77633	0.56584	0.420374	0.600118	0.619767	0.728689	0.422838	0.707892	0.494153	0.692646
0.869592	0.626782	0.660273	0.685391	0.89471	0.861219	0.7986	0.693764	0.534681	0.6994	0.728051	0.693523	0.687369	0.751136	0.754808	0.687721	0.735265	0.727495	0.7758	0.78732	0.693004	0.701025	0.824057	0.783002	0.899479	0.759173	0.802742	0.618829	0.388094	0.500273	0.642431	0.717411	0.68884	0.589627	0.545689	0.651386
0.928201	0.877964	0.944946	0.903083	0.877964	0.919828	0.8827	0.191399	0.928201	0.7386	0.689756	0.803446	0.671635	0.639747	0.70495	0.636979	0.67026	0.714873	0.757539	0.742863	0.933647	0.820157	0.634402	0.722781	0.794797	0.789742	0.791936	0.589473	0.492755	0.524568	0.548537	0.671752	0.801724	0.783414	0.729671	0.686535
0.886337	0.961692	0.869592	0.852846	0.919828	0.752373	0.8656	0.877964	0.928201	0.7571	0.653253	0.698413	0.731992	0.668152	0.700976	0.763568	0.75962	0.728557	0.737877	0.854932	0.767035	0.837662	0.77058	0.726622	0.815901	0.704301	0.739621	0.740852	0.900876	0.587387	0.718265	0.746241	0.600585	0.690121	0.556566	0.548685
0.826715	0.208372	0.889301	0.825665	0.930567	0.928545	0.867613	0.92516	0.940813	0.64558	0.62996	0.668286	0.696957	0.769434	0.756992	0.64242	0.725631	0.663989	0.777393	0.792798	0.933788	0.833042	0.806589	0.810035	0.82701	0.89155	0.769096	0.725563	0.631568	0.728353	0.718127	0.480995	0.601359	0.602917	0.752188	0.438625
0.906309	0.873603	0.891067	0.769826	0.88172	0.672184	0.894219	0.192982	0.831211	0.733351	0.728698	0.694631	0.672264	0.689869	0.772185	0.800559	0.736309	0.772052	0.722532	0.909914	0.808977	0.764613	0.766017	0.805116	0.878008	0.870542	0.76659	0.730478	0.391568	0.480505	0.71552	0.55797	0.425271	0.604877	0.893219	0.667419
0.768581	0.908025	0.879695	0.887761	0.732779	0.831814	0.867892	0.845035	0.586844	0.688867	0.686413	0.772216	0.759006	0.768355	0.69165	0.761009	0.768479	0.685088	0.772237	0.827584	0.848164	0.896245	0.956187	0.692955	0.907925	0.688609	0.799969	0.499113	0.631209	0.644424	0.699462	0.432364	0.456118	0.570755	0.698501	0.468568
0.919718	0.640246	0.863537	0.859745	0.840482	0.914775	0.873239	0.824338	0.533771	0.69334	0.795315	0.874877	0.825284	0.758473	0.704968	0.762325	0.676282	0.709418	0.73368	0.735645	0.667442	0.701817	0.736777	0.7877	0.915293	0.772458	0.866809	0.529248	0.592598	0.72258	0.543145	0.488065	0.537821	0.605325	0.633957	0.654889
0.925503	0.904859	0.868485	0.771169	0.707978	0.846669	0.738283	0.887448	0.886306	0.721747	0.749797	0.70316	0.686197	0.664826	0.720274	0.769439	0.719953	0.729591	0.739871	0.889086	0.740152	0.818945	0.80566	0.809	0.817386	0.766597	0.734793	0.628832	0.417435	0.592036	0.704498	0.749117	0.657097	0.675458	0.639806	0.625694
0.883483	0.899972	0.927445	0.70783	0.73732	0.930611	0.918711	0.697245	0.97033	0.728873	0.747128	0.637394	0.682394	0.637386	0.710619	0.768052	0.794763	0.757071	0.79754	0.797152	0.830845	0.737597	0.825024	0.804559	0.8095	0.791513	0.946024	0.594138	0.696851	0.597407	0.727444	0.720519	0.685138	0.621913	0.727979	0.529892
0.901793	0.830907	0.631712	0.787916	0.912344	0.833638	0.795023	0.894218	0.691603	0.635629	0.695243	0.771165	0.754374	0.744976	0.719497	0.715241	0.690843	0.721758	0.753123	0.769669	0.852857	0.76951	0.712536	0.731545	0.803405	0.73491	0.793688	0.465148	0.5819	0.77171	0.528014	0.733066	0.553129	0.477014	0.780029	0.776914
0.920664	0.736991	0.882148	0.944057	0.913783	0.893424	0.746373	0.911032	0.848407	0.713238	0.781514	0.705593	0.747102	0.630509	0.684723	0.765976	0.667592	0.770706	0.829726	0.873837	0.924794	0.707112	0.768547	0.831283	0.78944	0.810906	0.794817	0.739275	0.683809	0.620601	0.753484	0.806918	0.690145	0.693243	0.60822	0.68421
0.857098	0.688594	0.928412	0.899768	0.47314	0.750091	0.895198	0.898573	0.742284	0.764227	0.743847	0.725235	0.685484	0.816826	0.726167	0.771564	0.673124	0.646301	0.813143	0.850813	0.796689	0.71091	0.81081	0.834838	0.766988	0.741639	0.787653	0.654061	0.489408	0.733372	0.641466	0.746721	0.426883	0.702354	0.346835	0.799238
0.871377	0.821664	0.65651	0.90438	0.76496	0.911206	0.367697	0.657736	0.803523	0.733948	0.655867	0.763034	0.725675	0.680573	0.688107	0.773434	0.710299	0.729983	0.782099	0.823647	0.627975	0.91662	0.734571	0.737872	0.611134	0.791369	0.649843	0.563036	0.763188	0.649712	0.772511	0.520332	0.53432	0.71881	0.498345	0.436302
0.860413	0.622122	0.866915	0.687166	0.859063	0.906325	0.691184	0.886164	0.92974	0.693549	0.653583	0.712928	0.720145	0.66426	0.744949	0.72815	0.706689	0.758007	0.851825	0.859329	0.851827	0.73188	0.722511	0.846662	0.825484	0.816685	0.776995	0.559429	0.497887	0.741018	0.833297	0.767825	0.803703	0.579852	0.705893	0.749046
0.862196	0.953172	0.806588	0.861951	0.891732	0.974025	0.816883	0.831231	0.426387	0.701096	0.674154	0.662337	0.75091	0.745437	0.694106	0.704661	0.76589	0.744309	0.720542	0.812427	0.859271	0.79337	0.74935	0.676915	0.842409	0.814133	0.795749	0.458864	0.49808	0.499139	0.552933	0.597044	0.695637	0.879898	0.698695	0.649123
0.72123	0.890652	0.876447	0.83901	0.863251	0.89401	0.930403	0.853195	0.858724	0.672724	0.603114	0.603258	0.776331	0.8098	0.786316	0.73224	0.706852	0.718581	0.760027	0.695448	0.785773	0.7842	0.842947	0.712504	0.818549	0.837231	0.71952	0.612756	0.59974	0.457035	0.545851	0.673897	0.678146	0.805245	0.485649	0.546354
0.940388	0.970206	0.812075	0.927782	0.89946	0.908981	0.925774	0.75657	0.893077	0.756116	0.757593	0.807571	0.75929	0.793593	0.762059	0.720825	0.654074	0.679912	0.824725	0.696951	0.714885	0.820783	0.826929	0.720286	0.910918	0.902915	0.936139	0.601118	0.710093	0.59869	0.722416	0.719419	0.685974	0.717889	0.516951	0.55074
0.927535	0.897182	0.85097	0.699406	0.80804	0.90745	0.874892	0.778536	0.729066	0.791215	0.753737	0.811675	0.75217	0.684407	0.686021	0.68172	0.773524	0.739788	0.847679	0.855811	0.769685	0.841365	0.931457	0.716699	0.798801	0.767717	0.844762	0.597123	0.764625	0.527523	0.644332	0.531404	0.565462	0.674492	0.561588	0.613804
0.872375	0.850765	0.91099	0.811247	0.632009	0.870523	0.743957	0.734501	0.930503	0.703347	0.691865	0.760802	0.728955	0.77188	0.705273	0.746296	0.762592	0.702846	0.747099	0.829924	0.694648	0.748709	0.628711	0.817355	0.619815	0.706505	0.796294	0.58913	0.719532	0.753771	0.791922	0.686213	0.422812	0.788001	0.764015	0.509892
0.864493	0.87563	0.951094	0.772303	0.88102	0.860265	0.937631	0.846567	0.790992	0.743211	0.728513	0.658856	0.680122	0.753026	0.80295	0.612552	0.679253	0.732787	0.78865	0.802712	0.817178	0.764502	0.773574	0.897528	0.781544	0.76163	0.840681	0.538403	0.905681	0.574932	0.624689	0.737617	0.683275	0.683845	0.525652	0.717533
0.81672	0.931632	0.724399	0.908747	0.803992	0.772293	0.865026	0.894397	0.563339	0.760479	0.722516	0.715771	0.753515	0.7829	0.728301	0.706622	0.759576	0.645524	0.711422	0.737825	0.928115	0.719899	0.862033	0.882553	0.72442	0.797298	0.904139	0.614602	0.468323	0.488213	0.786804	0.622919	0.792363	0.583773	0.628266	0.606486
0.91087	0.830872	0.900468	0.941465	0.84535	0.341415	0.8894	0.763333	0.891018	0.729245	0.603196	0.738045	0.767017	0.78097	0.757043	0.755388	0.714197	0.743953	0.734969	0.724009	0.713435	0.839131	0.948777	0.702286	0.761583	0.836123	0.763666	0.359263	0.571652	0.694025	0.46744	0.384485	0.881962	0.584344	0.550401	0.696302
0.76848	0.945809	0.853966	0.899674	0.792709	0.843134	0.673771	0.922376	0.923276	0.813617	0.714374	0.712511	0.673853	0.635867	0.70551	0.636814	0.714702	0.669168	0.873094	0.862592	0.947356	0.721354	0.702257	0.734083	0.68618	0.810296	0.776854	0.564306	0.539528	0.670175	0.552339	0.750418	0.626096	0.591632	0.684623	0.601576
0.855003	0.899185	0.899357	0.913152	0.790244	0.842663	0.744847	0.844702	0.797596	0.703592	0.751364	0.602658	0.689675	0.741844	0.791737	0.760249	0.672263	0.745295	0.84385	0.737377	0.849567	0.793172	0.808917	0.851724	0.77114	0.8207	0.948155	0.363233	0.539383	0.766458	0.467511	0.435528	0.548064	0.691215	0.772254	0.600615
0.803361	0.827988	0.931828	0.932633	0.847451	0.757387	0.740836	0.698849	0.928914	0.740524	0.618904	0.799829	0.732806	0.751091	0.680535	0.701104	0.675878	0.718114	0.750933	0.818462	0.738729	0.897096	0.723826	0.728692	0.792214	0.763031	0.780591	0.55492	0.608103	0.593887	0.547049	0.813156	0.692868	0.806864	0.54818	0.669235
0.863669	0.871682	0.855853	0.808917	0.813391	0.891215	0.912626	0.937121	0.585206	0.744823	0.754316	0.727164	0.766203	0.751381	0.684307	0.712276	0.684198	0.737836	0.706949	0.908741	0.773244	0.708882	0.728559	0.702645	0.678637	0.89676	0.863022	0.625582	0.5926	0.450427	0.540154	0.754114	0.808716	0.473637	0.608928	0.801854
0.77432	0.927782	0.857269	0.70148	0.889948	0.832498	0.692982	0.916639	0.928242	0.745072	0.652443	0.716914	0.757467	0.630585	0.719631	0.766088	0.670774	0.737936	0.806165	0.863333	0.694586	0.762802	0.782673	0.8109	0.617756	0.798053	0.844325	0.617013	0.692873	0.651519	0.716515	0.734367	0.427469	0.578471	0.48802	0.764509
0.926254	0.917083	0.913026	0.953498	0.875454	0.666956	0.816329	0.881367	0.837138	0.759067	0.694008	0.687727	0.70382	0.780665	0.686633	0.714326	0.727366	0.665687	0.740296	0.829575	0.665294	0.708731	0.743493	0.879522	0.918978	0.769389	0.793421	0.45451	0.492895	0.572303	0.708695	0.594359	0.424778	0.572782	0.516039	0.44183
0.910313	0.828528	0.90048	0.775713	0.738972	0.846916	0.364213	0.777775	0.889879	0.648709	0.652568	0.635661	0.725084	0.766711	0.732255	0.802597	0.702864	0.728459	0.768182	0.856055	0.927687	0.758157	0.634624	0.897772	0.881995	0.754512	0.898961	0.602922	0.497105	0.719069	0.73324	0.535457	0.624072	0.609457	0.755296	0.725627
0.887282	0.897683	0.893903	0.893829	0.910987	0.87537	0.794753	0.850339	0.937709	0.750817	0.602087	0.710938	0.756342	0.64418	0.765051	0.758195	0.705437	0.697649	0.788072	0.781528	0.625065	0.919223	0.816119	0.722133	0.828803	0.840682	0.779856	0.461833	0.769787	0.582811	0.552824	0.556134	0.885789	0.877568	0.640039	0.430511
0.871007	0.868827	0.88038	0.871982	0.896208	0.863718	0.91389	0.732483	0.692105	0.690969	0.731795	0.773194	0.760546	0.80845	0.705059	0.734243	0.733403	0.759781	0.755607	0.725673	0.778284	0.834045	0.843228	0.786063	0.846845	0.683936	0.781895	0.565796	0.420274	0.694957	0.756228	0.730155	0.599063	0.589717	0.791823	0.616772
0.867621	0.639003	0.877809	0.768493	0.817809	0.978445	0.929872	0.19048	0.820618	0.713893	0.684591	0.706231	0.755799	0.748713	0.70758	0.773975	0.760575	0.732601	0.776974	0.695219	0.945419	0.706174	0.79426	0.794	0.791285	0.779072	0.785307	0.598944	0.389698	0.740686	0.554301	0.686335	0.674492	0.71992	0.629141	0.551005
0.714668	0.842082	0.656104	0.904054	0.472184	0.904042	0.925406	0.909291	0.563173	0.676426	0.797378	0.869291	0.667806	0.776579	0.754442	0.76186	0.800635	0.690967	0.761555	0.795787	0.832347	0.720312	0.949161	0.745647	0.899084	0.811586	0.759077	0.740864	0.708197	0.497631	0.833594	0.387609	0.689725	0.585418	0.692833	0.543882
0.91237	0.935976	0.869654	0.820133	0.635848	0.915808	0.891521	0.854258	0.427212	0.696942	0.73958	0.655728	0.74426	0.637457	0.731539	0.636818	0.720815	0.647187	0.820633	0.800512	0.723441	0.74115	0.742028	0.729118	0.782563	0.706145	0.851676	0.739381	0.638909	0.723854	0.715571	0.720094	0.421494	0.58581	0.560896	0.689572
0.880805	0.823069	0.936276	0.858001	0.741966	0.89505	0.859622	0.915455	0.858533	0.690083	0.746248	0.77045	0.753667	0.770322	0.686126	0.762035	0.713289	0.75899	0.742305	0.729773	0.849949	0.841132	0.961329	0.828905	0.768117	0.742415	0.738986	0.594786	0.625339	0.732547	0.620868	0.712772	0.803042	0.776624	0.497752	0.52736
0.922916	0.69669	0.727029	0.90618	0.756173	0.924559	0.887647	0.816791	0.804957	0.717637	0.73096	0.811982	0.678421	0.687289	0.701518	0.770702	0.766535	0.723734	0.82003	0.889702	0.807686	0.773944	0.77667	0.678916	0.837237	0.769333	0.776318	0.591356	0.575729	0.483302	0.784471	0.480207	0.678273	0.703586	0.692748	0.75663
0.915692	0.945871	0.824186	0.681283	0.911917	0.927523	0.862866	0.827895	0.964329	0.766145	0.773285	0.699139	0.668277	0.662945	0.700169	0.634011	0.700726	0.77656	0.796346	0.77211	0.928565	0.731595	0.858789	0.812111	0.810097	0.841868	0.795654	0.563436	0.77537	0.605264	0.72049	0.741595	0.453478	0.607029	0.633457	0.633695
0.880265	0.968802	0.801917	0.827983	0.838169	0.886568	0.882517	0.756066	0.73084	0.807947	0.602419	0.773027	0.788485	0.673718	0.727204	0.743285	0.697018	0.658799	0.718291	0.854413	0.852333	0.76124	0.839851	0.823943	0.608624	0.81931	0.79022	0.537465	0.9024	0.746122	0.642108	0.744099	0.657298	0.687985	0.899788	0.610835
0.827201	0.747554	0.635081	0.705832	0.899161	0.91769	0.878605	0.903216	0.748543	0.705018	0.694326	0.714676	0.720769	0.693196	0.704341	0.769042	0.764882	0.718295	0.836404	0.837159	0.931487	0.834462	0.697169	0.822706	0.816372	0.871646	0.649569	0.50086	0.720131	0.620055	0.527244	0.517669	0.556946	0.671212	0.528847	0.47169
0.766263	0.895916	0.8683	0.770157	0.849685	0.339814	0.897718	0.7618	0.923913	0.731149	0.751371	0.729712	0.750685	0.768853	0.767054	0.732931	0.768594	0.727766	0.721472	0.862611	0.795087	0.808276	0.723391	0.720271	0.906325	0.737212	0.767928	0.547159	0.576122	0.642171	0.795419	0.630712	0.685269	0.679962	0.344928	0.512848
0.905638	0.632691	0.95235	0.947861	0.697744	0.904438	0.747128	0.878843	0.885167	0.635566	0.717557	0.669684	0.687128	0.68016	0.75194	0.734826	0.653198	0.666973	0.73146	0.806196	0.838893	0.815129	0.805882	0.69009	0.813684	0.888367	0.951847	0.648036	0.493314	0.476537	0.7747	0.48657	0.544061	0.62128	0.736927	0.652758
0.937735	0.209138	0.876101	0.787982	0.8864	0.773939	0.882608	0.882369	0.533631	0.71965	0.676465	0.759483	0.812896	0.806168	0.801953	0.622419	0.712659	0.650958	0.885271	0.847423	0.699521	0.772453	0.926508	0.719565	0.828218	0.808304	0.794731	0.614057	0.676331	0.523484	0.642426	0.66635	0.528608	0.604356	0.69962	0.688394
0.872439	0.886011	0.871907	0.907315	0.932152	0.832997	0.671094	0.662864	0.888254	0.782885	0.755366	0.659294	0.684769	0.79682	0.749059	0.681575	0.761501	0.741095	0.783147	0.694108	0.819834	0.693	0.76884	0.8072	0.732016	0.783584	0.723984	0.71803	0.464476	0.664045	0.700278	0.777909	0.6928	0.726779	0.6988	0.656617
MOS （60trials * 4 evaluators）
ours									baseline1									baseline2									baseline3
Participant1	Participant2	Participant3	Participant4	Participant5	Participant6	Participant7	Participant8	Participant9	Participant1	Participant2	Participant3	Participant4	Participant5	Participant6	Participant7	Participant8	Participant9	Participant1	Participant2	Participant3	Participant4	Participant5	Participant6	Participant7	Participant8	Participant9	Participant1	Participant2	Participant3	Participant4	Participant5	Participant6	Participant7	Participant8	Participant9
5	5	4	5	5	5	5	4	5	1	1	1	1	1	1	1	1	1	4	4	3	4	4	3	3	4	4	5	5	4	5	5	4	5	5	5
5	3	4	4	4	4	3	5	5	2	1	1	2	1	3	1	1	2	2	2	2	3	3	2	2	1	2	5	4	5	5	5	5	4	5	5
3	5	3	3	4	3	3	3	3	2	1	1	1	1	2	1	1	1	3	3	3	4	4	1	1	1	2	5	5	5	5	4	5	5	5	5
4	4	4	3	4	4	4	3	5	1	1	1	1	2	1	3	1	1	3	3	1	2	3	2	2	3	3	5	5	4	5	5	5	4	5	5
3	3	4	3	5	4	4	3	4	1	2	1	2	1	2	1	3	2	4	4	4	4	4	2	3	2	1	5	5	5	5	4	5	5	5	5
3	4	5	3	4	5	5	5	4	2	1	2	1	3	1	2	2	1	1	1	1	2	3	1	3	3	2	5	4	4	5	4	4	5	4	5
3	4	3	2	4	3	3	3	2	1	1	1	1	1	1	1	1	1	4	3	3	4	5	3	3	3	2	5	5	5	5	5	5	5	5	5
4	3	5	3	4	3	3	3	3	1	2	1	1	1	1	1	2	1	3	4	4	4	4	1	4	3	4	5	5	5	4	5	5	5	5	5
4	3	4	3	4	5	5	4	5	2	1	2	2	1	1	2	1	1	3	3	3	3	3	3	3	3	2	5	4	5	5	5	5	4	5	5
4	5	5	3	5	5	3	4	5	1	1	1	1	2	1	1	2	2	4	4	3	3	4	3	3	3	3	5	5	5	5	5	5	5	5	5
4	4	5	3	4	3	4	3	4	1	1	1	1	1	1	1	2	1	3	3	2	3	2	3	3	4	2	5	5	5	5	5	4	5	5	5
4	4	5	5	5	4	4	5	5	2	2	2	2	1	2	1	1	1	4	4	3	4	4	3	4	3	1	5	5	5	4	5	5	5	5	5
5	4	4	4	4	5	3	4	4	1	1	1	1	3	2	2	1	1	3	3	3	3	2	3	4	1	2	5	5	5	5	5	5	4	5	5
4	3	4	3	3	3	3	3	4	1	1	1	1	2	1	1	1	1	3	3	1	3	2	2	3	4	4	5	5	5	4	5	5	5	5	5
5	5	4	4	4	4	5	4	5	3	3	1	1	1	1	1	1	2	4	3	4	4	3	3	4	4	2	5	5	5	5	5	5	5	5	5
5	4	5	4	5	5	3	5	4	1	1	2	1	1	1	2	2	1	3	3	4	4	3	3	4	4	3	5	5	5	4	5	5	5	4	5
3	3	4	4	5	3	4	4	4	1	1	2	2	1	1	1	1	1	3	2	2	3	2	1	3	3	2	5	5	5	5	5	4	5	5	5
5	4	4	3	4	3	3	4	3	2	1	1	1	2	1	1	1	1	3	4	1	4	3	2	3	3	2	5	5	5	4	5	5	5	5	5
4	3	3	4	4	4	4	5	4	1	2	1	1	1	1	1	2	1	2	3	2	3	2	2	3	3	3	5	5	4	5	4	5	5	5	5
5	4	4	5	4	4	5	4	3	1	1	1	1	1	2	1	1	2	4	3	4	3	2	2	2	3	2	5	4	4	5	4	4	5	4	4
3	4	4	4	4	3	5	3	3	1	3	2	2	1	3	2	1	2	4	1	4	4	2	2	1	3	4	5	5	5	5	5	5	5	5	5
5	4	4	3	4	5	4	5	3	2	2	1	2	1	1	1	1	1	4	3	3	4	5	3	4	3	2	5	5	4	5	5	4	5	5	5
5	5	4	3	3	5	4	4	4	1	2	2	1	1	1	1	1	1	2	4	3	4	2	2	3	4	4	5	5	5	4	5	5	5	5	4
5	3	5	5	4	3	3	5	3	1	1	1	1	2	1	2	2	1	2	3	3	3	3	1	4	2	2	5	5	5	5	5	4	5	5	5
5	4	4	3	5	5	4	4	4	2	2	1	1	3	1	1	3	2	3	4	3	3	3	2	3	4	3	5	5	4	5	5	5	5	5	5
4	4	4	3	4	3	5	5	2	1	1	1	1	1	1	1	1	2	4	3	2	3	4	3	3	3	3	5	5	5	5	4	5	5	4	5
5	4	4	2	4	3	3	5	5	1	1	1	1	1	1	1	2	2	3	3	4	2	2	1	3	3	2	5	5	5	5	5	5	5	5	5
3	5	4	4	4	3	3	4	5	2	1	1	2	1	2	1	2	1	4	2	1	3	4	3	2	3	3	5	5	4	5	4	5	4	5	5
5	5	5	3	4	4	5	4	5	2	1	1	1	1	1	2	2	1	4	3	1	4	4	2	2	4	2	5	5	5	5	4	5	5	5	5
4	3	3	3	5	3	5	3	4	3	2	1	1	2	2	2	2	1	1	4	3	3	4	2	3	3	4	5	5	5	5	5	5	5	5	5
5	3	5	4	4	4	3	3	5	1	1	1	1	1	1	1	1	2	3	3	1	4	2	2	3	3	2	5	5	5	5	5	4	5	5	5
3	3	5	3	4	5	3	4	5	1	1	2	1	1	1	1	2	1	3	3	2	2	4	3	4	4	3	5	5	4	4	5	5	5	4	5
4	4	3	3	5	5	5	4	4	1	1	2	1	1	2	1	1	1	3	4	3	4	4	3	3	1	2	5	5	5	4	5	5	5	5	5
3	4	4	4	4	4	4	5	4	2	1	1	1	2	1	3	1	1	3	3	2	3	2	1	2	3	2	5	4	5	5	5	4	5	5	5
4	4	5	3	5	4	3	4	4	1	1	1	1	1	1	1	1	1	3	3	4	3	3	2	4	1	2	5	4	5	4	4	5	5	5	5
4	4	4	5	4	4	4	3	5	2	1	1	1	1	1	1	1	1	4	3	2	3	3	3	4	3	1	5	5	5	5	5	5	4	4	5
4	3	4	4	5	4	4	4	5	1	1	2	2	2	1	1	1	1	3	2	4	4	3	3	3	4	1	5	5	5	5	4	4	5	5	5
4	5	3	5	5	3	3	3	4	1	1	1	2	1	1	1	1	1	4	4	4	4	3	3	3	3	2	5	4	4	4	5	5	4	5	5
3	3	5	4	4	5	3	3	4	1	1	1	1	3	2	1	1	1	3	3	3	4	3	1	3	3	2	5	5	5	5	5	5	5	5	5
4	3	4	3	4	4	3	3	3	1	1	1	1	1	2	1	1	1	3	4	1	3	2	3	3	1	2	5	4	5	5	5	5	4	5	5
5	3	5	4	4	5	3	4	3	1	1	1	1	1	3	3	1	1	3	3	2	3	4	3	3	4	4	5	5	5	5	5	5	5	5	5
5	5	4	4	3	3	3	3	4	1	1	1	2	1	2	1	2	2	1	4	3	3	2	1	3	2	2	5	4	5	5	4	4	5	4	5
3	3	4	4	5	4	4	3	2	1	1	1	1	1	1	2	2	1	4	4	2	4	3	2	4	3	2	5	5	4	5	5	4	4	5	5
5	3	4	5	4	4	4	4	4	1	1	2	1	2	1	1	2	1	2	2	1	4	2	3	1	3	2	5	5	5	4	5	5	5	5	5
3	5	5	3	4	3	3	3	5	1	2	1	1	3	1	2	1	1	3	4	1	4	3	2	4	3	2	5	5	5	5	4	5	4	5	5
4	5	4	5	5	3	3	3	5	1	2	1	1	1	2	1	2	1	3	4	4	3	2	3	3	3	4	5	4	5	5	4	5	5	5	5
4	4	3	3	4	5	5	4	5	1	1	1	2	2	1	1	1	1	3	3	3	3	3	3	3	4	3	5	5	5	4	5	5	5	4	5
5	4	3	3	4	3	3	3	4	2	1	1	1	1	1	1	1	2	4	3	3	3	4	3	2	4	2	5	5	5	4	5	5	5	5	5
4	5	4	3	4	5	5	4	3	2	1	2	1	1	1	2	1	1	3	3	3	2	5	2	4	4	2	5	5	5	5	5	5	5	5	5
5	3	4	2	4	3	5	3	3	1	1	2	1	1	2	1	1	1	4	4	2	3	3	3	4	4	2	5	5	5	5	4	5	5	5	5
3	4	4	3	4	4	3	4	4	1	1	1	1	1	1	1	3	1	4	3	1	3	4	3	2	1	2	5	4	5	5	5	5	5	5	5
4	3	4	3	5	4	5	3	5	1	1	1	2	1	2	2	1	1	3	2	2	4	4	1	3	1	4	5	5	4	5	5	5	5	5	5
4	4	4	3	4	3	4	4	4	2	3	2	1	1	1	1	1	2	4	3	3	2	4	1	3	3	2	5	5	5	5	5	5	5	5	5
3	4	5	3	4	4	4	4	4	2	2	1	2	1	1	1	1	1	3	3	4	3	4	2	3	3	3	5	4	4	4	5	4	5	5	5
5	4	3	3	4	5	3	5	5	1	1	1	2	1	1	1	1	2	4	3	4	4	2	2	3	3	1	5	5	5	4	5	5	5	5	4
5	3	4	5	5	4	3	5	4	1	1	1	1	1	1	1	1	1	4	3	3	4	2	3	3	3	3	5	5	4	5	5	4	5	5	5
4	4	5	4	5	5	3	5	4	2	1	1	1	3	1	1	2	2	3	3	3	4	3	2	3	1	3	5	5	4	5	5	4	4	5	5
4	4	5	4	5	5	5	4	5	2	1	2	1	2	1	1	1	1	3	4	1	3	3	3	4	3	2	5	5	5	5	5	5	5	5	5
4	3	4	4	4	3	4	5	3	3	1	1	1	1	2	1	1	1	3	1	4	4	2	1	2	3	2	5	5	5	5	4	5	5	4	5
3	4	5	3	4	4	4	5	5	1	2	1	1	2	1	1	2	1	2	3	4	4	3	2	3	3	1	5	5	5	5	5	5	4	5	5
5	5	4	5	5	5	5	4	5	1	1	1	1	1	1	1	1	1	4	4	3	4	4	3	3	4	4	5	5	4	5	5	4	5	5	5
5	3	4	4	4	4	3	5	5	2	1	1	2	1	3	1	1	2	2	2	2	3	3	2	2	1	2	5	4	5	5	5	5	4	5	5
3	5	3	3	4	3	3	3	3	2	1	1	1	1	2	1	1	1	3	3	3	4	4	1	1	1	2	5	5	5	5	4	5	5	5	5
4	4	4	3	4	4	4	3	5	1	1	1	1	2	1	3	1	1	3	3	1	2	3	2	2	3	3	5	5	4	5	5	5	4	5	5
3	3	4	3	5	4	4	3	4	1	2	1	2	1	2	1	3	2	4	4	4	4	4	2	3	2	1	5	5	5	5	4	5	5	5	5
3	4	5	3	4	5	5	5	4	2	1	2	1	3	1	2	2	1	1	1	1	2	3	1	3	3	2	5	4	4	5	4	4	5	4	5
3	4	3	2	4	3	3	3	2	1	1	1	1	1	1	1	1	1	4	3	3	4	5	3	3	3	2	5	5	5	5	5	5	5	5	5
4	3	5	3	4	3	3	3	3	1	2	1	1	1	1	1	2	1	3	4	4	4	4	1	4	3	4	5	5	5	4	5	5	5	5	5
4	3	4	3	4	5	5	4	5	2	1	2	2	1	1	2	1	1	3	3	3	3	3	3	3	3	2	5	4	5	5	5	5	4	5	5
4	5	5	3	5	5	3	4	5	1	1	1	1	2	1	1	2	2	4	4	3	3	4	3	3	3	3	5	5	5	5	5	5	5	5	5
4	4	5	3	4	3	4	3	4	1	1	1	1	1	1	1	2	1	3	3	2	3	2	3	3	4	2	5	5	5	5	5	4	5	5	5
4	4	5	5	5	4	4	5	5	2	2	2	2	1	2	1	1	1	4	4	3	4	4	3	4	3	1	5	5	5	4	5	5	5	5	5
5	4	4	4	4	5	3	4	4	1	1	1	1	3	2	2	1	1	3	3	3	3	2	3	4	1	2	5	5	5	5	5	5	4	5	5
4	3	4	3	3	3	3	3	4	1	1	1	1	2	1	1	1	1	3	3	1	3	2	2	3	4	4	5	5	5	4	5	5	5	5	5
5	5	4	4	4	4	5	4	5	3	3	1	1	1	1	1	1	2	4	3	4	4	3	3	4	4	2	5	5	5	5	5	5	5	5	5
5	4	5	4	5	5	3	5	4	1	1	2	1	1	1	2	2	1	3	3	4	4	3	3	4	4	3	5	5	5	4	5	5	5	4	5
3	3	4	4	5	3	4	4	4	1	1	2	2	1	1	1	1	1	3	2	2	3	2	1	3	3	2	5	5	5	5	5	4	5	5	5
5	4	4	3	4	3	3	4	3	2	1	1	1	2	1	1	1	1	3	4	1	4	3	2	3	3	2	5	5	5	4	5	5	5	5	5
4	3	3	4	4	4	4	5	4	1	2	1	1	1	1	1	2	1	2	3	2	3	2	2	3	3	3	5	5	4	5	4	5	5	5	5
5	4	4	5	4	4	5	4	3	1	1	1	1	1	2	1	1	2	4	3	4	3	2	2	2	3	2	5	4	4	5	4	4	5	4	4
3	4	4	4	4	3	5	3	3	1	3	2	2	1	3	2	1	2	4	1	4	4	2	2	1	3	4	5	5	5	5	5	5	5	5	5
5	4	4	3	4	5	4	5	3	2	2	1	2	1	1	1	1	1	4	3	3	4	5	3	4	3	2	5	5	4	5	5	4	5	5	5
5	5	4	3	3	5	4	4	4	1	2	2	1	1	1	1	1	1	2	4	3	4	2	2	3	4	4	5	5	5	4	5	5	5	5	4
5	3	5	5	4	3	3	5	3	1	1	1	1	2	1	2	2	1	2	3	3	3	3	1	4	2	2	5	5	5	5	5	4	5	5	5
5	4	4	3	5	5	4	4	4	2	2	1	1	3	1	1	3	2	3	4	3	3	3	2	3	4	3	5	5	4	5	5	5	5	5	5
4	4	4	3	4	3	5	5	2	1	1	1	1	1	1	1	1	2	4	3	2	3	4	3	3	3	3	5	5	5	5	4	5	5	4	5
5	4	4	2	4	3	3	5	5	1	1	1	1	1	1	1	2	2	3	3	4	2	2	1	3	3	2	5	5	5	5	5	5	5	5	5
3	5	4	4	4	3	3	4	5	2	1	1	2	1	2	1	2	1	4	2	1	3	4	3	2	3	3	5	5	4	5	4	5	4	5	5
5	5	5	3	4	4	5	4	5	2	1	1	1	1	1	2	2	1	4	3	1	4	4	2	2	4	2	5	5	5	5	4	5	5	5	5
4	3	3	3	5	3	5	3	4	3	2	1	1	2	2	2	2	1	1	4	3	3	4	2	3	3	4	5	5	5	5	5	5	5	5	5
5	3	5	4	4	4	3	3	5	1	1	1	1	1	1	1	1	2	3	3	1	4	2	2	3	3	2	5	5	5	5	5	4	5	5	5
3	3	5	3	4	5	3	4	5	1	1	2	1	1	1	1	2	1	3	3	2	2	4	3	4	4	3	5	5	4	4	5	5	5	4	5
4	4	3	3	5	5	5	4	4	1	1	2	1	1	2	1	1	1	3	4	3	4	4	3	3	1	2	5	5	5	4	5	5	5	5	5
3	4	4	4	4	4	4	5	4	2	1	1	1	2	1	3	1	1	3	3	2	3	2	1	2	3	2	5	4	5	5	5	4	5	5	5
4	4	5	3	5	4	3	4	4	1	1	1	1	1	1	1	1	1	3	3	4	3	3	2	4	1	2	5	4	5	4	4	5	5	5	5
4	4	4	5	4	4	4	3	5	2	1	1	1	1	1	1	1	1	4	3	2	3	3	3	4	3	1	5	5	5	5	5	5	4	4	5
4	3	4	4	5	4	4	4	5	1	1	2	2	2	1	1	1	1	3	2	4	4	3	3	3	4	1	5	5	5	5	4	4	5	5	5
4	5	3	5	5	3	3	3	4	1	1	1	2	1	1	1	1	1	4	4	4	4	3	3	3	3	2	5	4	4	4	5	5	4	5	5
3	3	5	4	4	5	3	3	4	1	1	1	1	3	2	1	1	1	3	3	3	4	3	1	3	3	2	5	5	5	5	5	5	5	5	5
4	3	4	3	4	4	3	3	3	1	1	1	1	1	2	1	1	1	3	4	1	3	2	3	3	1	2	5	4	5	5	5	5	4	5	5
5	3	5	4	4	5	3	4	3	1	1	1	1	1	3	3	1	1	3	3	2	3	4	3	3	4	4	5	5	5	5	5	5	5	5	5
5	5	4	4	3	3	3	3	4	1	1	1	2	1	2	1	2	2	1	4	3	3	2	1	3	2	2	5	4	5	5	4	4	5	4	5
3	3	4	4	5	4	4	3	2	1	1	1	1	1	1	2	2	1	4	4	2	4	3	2	4	3	2	5	5	4	5	5	4	4	5	5
5	3	4	5	4	4	4	4	4	1	1	2	1	2	1	1	2	1	2	2	1	4	2	3	1	3	2	5	5	5	4	5	5	5	5	5
3	5	5	3	4	3	3	3	5	1	2	1	1	3	1	2	1	1	3	4	1	4	3	2	4	3	2	5	5	5	5	4	5	4	5	5
4	5	4	5	5	3	3	3	5	1	2	1	1	1	2	1	2	1	3	4	4	3	2	3	3	3	4	5	4	5	5	4	5	5	5	5
4	4	3	3	4	5	5	4	5	1	1	1	2	2	1	1	1	1	3	3	3	3	3	3	3	4	3	5	5	5	4	5	5	5	4	5
5	4	3	3	4	3	3	3	4	2	1	1	1	1	1	1	1	2	4	3	3	3	4	3	2	4	2	5	5	5	4	5	5	5	5	5
4	5	4	3	4	5	5	4	3	2	1	2	1	1	1	2	1	1	3	3	3	2	5	2	4	4	2	5	5	5	5	5	5	5	5	5
5	3	4	2	4	3	5	3	3	1	1	2	1	1	2	1	1	1	4	4	2	3	3	3	4	4	2	5	5	5	5	4	5	5	5	5
3	4	4	3	4	4	3	4	4	1	1	1	1	1	1	1	3	1	4	3	1	3	4	3	2	1	2	5	4	5	5	5	5	5	5	5
4	3	4	3	5	4	5	3	5	1	1	1	2	1	2	2	1	1	3	2	2	4	4	1	3	1	4	5	5	4	5	5	5	5	5	5
4	4	4	3	4	3	4	4	4	2	3	2	1	1	1	1	1	2	4	3	3	2	4	1	3	3	2	5	5	5	5	5	5	5	5	5
3	4	5	3	4	4	4	4	4	2	2	1	2	1	1	1	1	1	3	3	4	3	4	2	3	3	3	5	4	4	4	5	4	5	5	5
5	4	3	3	4	5	3	5	5	1	1	1	2	1	1	1	1	2	4	3	4	4	2	2	3	3	1	5	5	5	4	5	5	5	5	4
5	3	4	5	5	4	3	5	4	1	1	1	1	1	1	1	1	1	4	3	3	4	2	3	3	3	3	5	5	4	5	5	4	5	5	5
4	4	5	4	5	5	3	5	4	2	1	1	1	3	1	1	2	2	3	3	3	4	3	2	3	1	3	5	5	4	5	5	4	4	5	5
4	4	5	4	5	5	5	4	5	2	1	2	1	2	1	1	1	1	3	4	1	3	3	3	4	3	2	5	5	5	5	5	5	5	5	5
4	3	4	4	4	3	4	5	3	3	1	1	1	1	2	1	1	1	3	1	4	4	2	1	2	3	2	5	5	5	5	4	5	5	4	5
3	4	5	3	4	4	4	5	5	1	2	1	1	2	1	1	2	1	2	3	4	4	3	2	3	3	1	5	5	5	5	5	5	4	5	5
5	5	4	5	5	5	5	4	5	1	1	1	1	1	1	1	1	1	4	4	3	4	4	3	3	4	4	5	5	4	5	5	4	5	5	5
5	3	4	4	4	4	3	5	5	2	1	1	2	1	3	1	1	2	2	2	2	3	3	2	2	1	2	5	4	5	5	5	5	4	5	5
3	5	3	3	4	3	3	3	3	2	1	1	1	1	2	1	1	1	3	3	3	4	4	1	1	1	2	5	5	5	5	4	5	5	5	5
4	4	4	3	4	4	4	3	5	1	1	1	1	2	1	3	1	1	3	3	1	2	3	2	2	3	3	5	5	4	5	5	5	4	5	5
3	5	4	4	4	3	3	4	5	2	1	1	2	1	2	1	2	1	4	2	1	3	4	3	2	3	3	5	5	4	5	4	5	4	5	5
5	5	5	3	4	4	5	4	5	2	1	1	1	1	1	2	2	1	4	3	1	4	4	2	2	4	2	5	5	5	5	4	5	5	5	5
4	3	3	3	5	3	5	3	4	3	2	1	1	2	2	2	2	1	1	4	3	3	4	2	3	3	4	5	5	5	5	5	5	5	5	5
5	3	5	4	4	4	3	3	5	1	1	1	1	1	1	1	1	2	3	3	1	4	2	2	3	3	2	5	5	5	5	5	4	5	5	5
3	3	5	3	4	5	3	4	5	1	1	2	1	1	1	1	2	1	3	3	2	2	4	3	4	4	3	5	5	4	4	5	5	5	4	5
4	4	3	3	5	5	5	4	4	1	1	2	1	1	2	1	1	1	3	4	3	4	4	3	3	1	2	5	5	5	4	5	5	5	5	5
3	4	4	4	4	4	4	5	4	2	1	1	1	2	1	3	1	1	3	3	2	3	2	1	2	3	2	5	4	5	5	5	4	5	5	5
4	4	5	3	5	4	3	4	4	1	1	1	1	1	1	1	1	1	3	3	4	3	3	2	4	1	2	5	4	5	4	4	5	5	5	5
4	4	4	5	4	4	4	3	5	2	1	1	1	1	1	1	1	1	4	3	2	3	3	3	4	3	1	5	5	5	5	5	5	4	4	5
4	3	4	4	5	4	4	4	5	1	1	2	2	2	1	1	1	1	3	2	4	4	3	3	3	4	1	5	5	5	5	4	4	5	5	5
4	5	3	5	5	3	3	3	4	1	1	1	2	1	1	1	1	1	4	4	4	4	3	3	3	3	2	5	4	4	4	5	5	4	5	5
3	3	5	4	4	5	3	3	4	1	1	1	1	3	2	1	1	1	3	3	3	4	3	1	3	3	2	5	5	5	5	5	5	5	5	5
4	3	4	3	4	4	3	3	3	1	1	1	1	1	2	1	1	1	3	4	1	3	2	3	3	1	2	5	4	5	5	5	5	4	5	5
5	3	5	4	4	5	3	4	3	1	1	1	1	1	3	3	1	1	3	3	2	3	4	3	3	4	4	5	5	5	5	5	5	5	5	5
5	5	4	4	3	3	3	3	4	1	1	1	2	1	2	1	2	2	1	4	3	3	2	1	3	2	2	5	4	5	5	4	4	5	4	5
3	3	4	4	5	4	4	3	2	1	1	1	1	1	1	2	2	1	4	4	2	4	3	2	4	3	2	5	5	4	5	5	4	4	5	5
5	3	4	5	4	4	4	4	4	1	1	2	1	2	1	1	2	1	2	2	1	4	2	3	1	3	2	5	5	5	4	5	5	5	5	5
4	3	4	4	5	4	4	4	5	1	1	2	2	2	1	1	1	1	3	2	4	4	3	3	3	4	1	5	5	5	5	4	4	5	5	5
4	5	3	5	5	3	3	3	4	1	1	1	2	1	1	1	1	1	4	4	4	4	3	3	3	3	2	5	4	4	4	5	5	4	5	5
3	3	5	4	4	5	3	3	4	1	1	1	1	3	2	1	1	1	3	3	3	4	3	1	3	3	2	5	5	5	5	5	5	5	5	5
4	3	4	3	4	4	3	3	3	1	1	1	1	1	2	1	1	1	3	4	1	3	2	3	3	1	2	5	4	5	5	5	5	4	5	5
5	3	5	4	4	5	3	4	3	1	1	1	1	1	3	3	1	1	3	3	2	3	4	3	3	4	4	5	5	5	5	5	5	5	5	5
5	5	4	4	3	3	3	3	4	1	1	1	2	1	2	1	2	2	1	4	3	3	2	1	3	2	2	5	4	5	5	4	4	5	4	5
3	3	4	4	5	4	4	3	2	1	1	1	1	1	1	2	2	1	4	4	2	4	3	2	4	3	2	5	5	4	5	5	4	4	5	5
5	3	4	5	4	4	4	4	4	1	1	2	1	2	1	1	2	1	2	2	1	4	2	3	1	3	2	5	5	5	4	5	5	5	5	5
3	5	5	3	4	3	3	3	5	1	2	1	1	3	1	2	1	1	3	4	1	4	3	2	4	3	2	5	5	5	5	4	5	4	5	5
4	5	4	5	5	3	3	3	5	1	2	1	1	1	2	1	2	1	3	4	4	3	2	3	3	3	4	5	4	5	5	4	5	5	5	5
4	4	3	3	4	5	5	4	5	1	1	1	2	2	1	1	1	1	3	3	3	3	3	3	3	4	3	5	5	5	4	5	5	5	4	5
5	4	3	3	4	3	3	3	4	2	1	1	1	1	1	1	1	2	4	3	3	3	4	3	2	4	2	5	5	5	4	5	5	5	5	5
4	5	4	3	4	5	5	4	3	2	1	2	1	1	1	2	1	1	3	3	3	2	5	2	4	4	2	5	5	5	5	5	5	5	5	5
5	3	4	2	4	3	5	3	3	1	1	2	1	1	2	1	1	1	4	4	2	3	3	3	4	4	2	5	5	5	5	4	5	5	5	5
3	4	4	3	4	4	3	4	4	1	1	1	1	1	1	1	3	1	4	3	1	3	4	3	2	1	2	5	4	5	5	5	5	5	5	5
4	3	4	3	5	4	5	3	5	1	1	1	2	1	2	2	1	1	3	2	2	4	4	1	3	1	4	5	5	4	5	5	5	5	5	5
4	4	4	3	4	3	4	4	4	2	3	2	1	1	1	1	1	2	4	3	3	2	4	1	3	3	2	5	5	5	5	5	5	5	5	5
3	4	5	3	4	4	4	4	4	2	2	1	2	1	1	1	1	1	3	3	4	3	4	2	3	3	3	5	4	4	4	5	4	5	5	5
5	4	3	3	4	5	3	5	5	1	1	1	2	1	1	1	1	2	4	3	4	4	2	2	3	3	1	5	5	5	4	5	5	5	5	4
5	3	4	5	5	4	3	5	4	1	1	1	1	1	1	1	1	1	4	3	3	4	2	3	3	3	3	5	5	4	5	5	4	5	5	5
4	4	5	4	5	5	3	5	4	2	1	1	1	3	1	1	2	2	3	3	3	4	3	2	3	1	3	5	5	4	5	5	4	4	5	5
4	4	5	4	5	5	5	4	5	2	1	2	1	2	1	1	1	1	3	4	1	3	3	3	4	3	2	5	5	5	5	5	5	5	5	5
3	3	4	4	5	3	4	4	4	1	1	2	2	1	1	1	1	1	3	2	2	3	2	1	3	3	2	5	5	5	5	5	4	5	5	5
5	4	4	3	4	3	3	4	3	2	1	1	1	2	1	1	1	1	3	4	1	4	3	2	3	3	2	5	5	5	4	5	5	5	5	5
3	4	3	2	4	3	3	3	2	1	1	1	1	1	1	1	1	1	4	3	3	4	5	3	3	3	2	5	5	5	5	5	5	5	5	5
4	3	5	3	4	3	3	3	3	1	2	1	1	1	1	1	2	1	3	4	4	4	4	1	4	3	4	5	5	5	4	5	5	5	5	5
4	3	4	3	4	5	5	4	5	2	1	2	2	1	1	2	1	1	3	3	3	3	3	3	3	3	2	5	4	5	5	5	5	4	5	5
4	5	5	3	5	5	3	4	5	1	1	1	1	2	1	1	2	2	4	4	3	3	4	3	3	3	3	5	5	5	5	5	5	5	5	5
4	4	5	3	4	3	4	3	4	1	1	1	1	1	1	1	2	1	3	3	2	3	2	3	3	4	2	5	5	5	5	5	4	5	5	5
4	4	5	5	5	4	4	5	5	2	2	2	2	1	2	1	1	1	4	4	3	4	4	3	4	3	1	5	5	5	4	5	5	5	5	5
5	4	4	4	4	5	3	4	4	1	1	1	1	3	2	2	1	1	3	3	3	3	2	3	4	1	2	5	5	5	5	5	5	4	5	5
4	3	4	3	3	3	3	3	4	1	1	1	1	2	1	1	1	1	3	3	1	3	2	2	3	4	4	5	5	5	4	5	5	5	5	5
5	5	4	4	4	4	5	4	5	3	3	1	1	1	1	1	1	2	4	3	4	4	3	3	4	4	2	5	5	5	5	5	5	5	5	5
4	3	3	3	5	3	5	3	4	3	2	1	1	2	2	2	2	1	1	4	3	3	4	2	3	3	4	5	5	5	5	5	5	5	5	5
5	3	5	4	4	4	3	3	5	1	1	1	1	1	1	1	1	2	3	3	1	4	2	2	3	3	2	5	5	5	5	5	4	5	5	5
4	3	3	4	4	4	4	5	4	1	2	1	1	1	1	1	2	1	2	3	2	3	2	2	3	3	3	5	5	4	5	4	5	5	5	5
5	4	4	5	4	4	5	4	3	1	1	1	1	1	2	1	1	2	4	3	4	3	2	2	2	3	2	5	4	4	5	4	4	5	4	4
3	4	4	4	4	3	5	3	3	1	3	2	2	1	3	2	1	2	4	1	4	4	2	2	1	3	4	5	5	5	5	5	5	5	5	5
5	4	4	3	4	5	4	5	3	2	2	1	2	1	1	1	1	1	4	3	3	4	5	3	4	3	2	5	5	4	5	5	4	5	5	5
5	5	4	3	3	5	4	4	4	1	2	2	1	1	1	1	1	1	2	4	3	4	2	2	3	4	4	5	5	5	4	5	5	5	5	4
5	3	5	5	4	3	3	5	3	1	1	1	1	2	1	2	2	1	2	3	3	3	3	1	4	2	2	5	5	5	5	5	4	5	5	5
5	4	4	3	5	5	4	4	4	2	2	1	1	3	1	1	3	2	3	4	3	3	3	2	3	4	3	5	5	4	5	5	5	5	5	5
4	4	4	3	4	3	5	5	2	1	1	1	1	1	1	1	1	2	4	3	2	3	4	3	3	3	3	5	5	5	5	4	5	5	4	5
5	4	4	2	4	3	3	5	5	1	1	1	1	1	1	1	2	2	3	3	4	2	2	1	3	3	2	5	5	5	5	5	5	5	5	5
3	5	4	4	4	3	3	4	5	2	1	1	2	1	2	1	2	1	4	2	1	3	4	3	2	3	3	5	5	4	5	4	5	4	5	5
5	5	5	3	4	4	5	4	5	2	1	1	1	1	1	2	2	1	4	3	1	4	4	2	2	4	2	5	5	5	5	4	5	5	5	5
5	4	4	3	5	5	4	4	4	2	2	1	1	3	1	1	3	2	3	4	3	3	3	2	3	4	3	5	5	4	5	5	5	5	5	5
4	4	4	3	4	3	5	5	2	1	1	1	1	1	1	1	1	2	4	3	2	3	4	3	3	3	3	5	5	5	5	4	5	5	4	5
5	4	4	2	4	3	3	5	5	1	1	1	1	1	1	1	2	2	3	3	4	2	2	1	3	3	2	5	5	5	5	5	5	5	5	5
3	3	5	3	4	5	3	4	5	1	1	2	1	1	1	1	2	1	3	3	2	2	4	3	4	4	3	5	5	4	4	5	5	5	4	5
4	4	3	3	5	5	5	4	4	1	1	2	1	1	2	1	1	1	3	4	3	4	4	3	3	1	2	5	5	5	4	5	5	5	5	5
3	4	4	4	4	4	4	5	4	2	1	1	1	2	1	3	1	1	3	3	2	3	2	1	2	3	2	5	4	5	5	5	4	5	5	5
4	4	5	3	5	4	3	4	4	1	1	1	1	1	1	1	1	1	3	3	4	3	3	2	4	1	2	5	4	5	4	4	5	5	5	5
4	4	4	5	4	4	4	3	5	2	1	1	1	1	1	1	1	1	4	3	2	3	3	3	4	3	1	5	5	5	5	5	5	4	4	5
5	5	4	5	5	5	5	4	5	1	1	1	1	1	1	1	1	1	4	4	3	4	4	3	3	4	4	5	5	4	5	5	4	5	5	5
5	3	4	4	4	4	3	5	5	2	1	1	2	1	3	1	1	2	2	2	2	3	3	2	2	1	2	5	4	5	5	5	5	4	5	5
3	5	3	3	4	3	3	3	3	2	1	1	1	1	2	1	1	1	3	3	3	4	4	1	1	1	2	5	5	5	5	4	5	5	5	5
4	4	4	3	4	4	4	3	5	1	1	1	1	2	1	3	1	1	3	3	1	2	3	2	2	3	3	5	5	4	5	5	5	4	5	5
3	3	4	3	5	4	4	3	4	1	2	1	2	1	2	1	3	2	4	4	4	4	4	2	3	2	1	5	5	5	5	4	5	5	5	5
3	4	5	3	4	5	5	5	4	2	1	2	1	3	1	2	2	1	1	1	1	2	3	1	3	3	2	5	4	4	5	4	4	5	4	5
3	4	3	2	4	3	3	3	2	1	1	1	1	1	1	1	1	1	4	3	3	4	5	3	3	3	2	5	5	5	5	5	5	5	5	5
4	3	5	3	4	3	3	3	3	1	2	1	1	1	1	1	2	1	3	4	4	4	4	1	4	3	4	5	5	5	4	5	5	5	5	5
4	3	4	3	4	5	5	4	5	2	1	2	2	1	1	2	1	1	3	3	3	3	3	3	3	3	2	5	4	5	5	5	5	4	5	5
4	5	5	3	5	5	3	4	5	1	1	1	1	2	1	1	2	2	4	4	3	3	4	3	3	3	3	5	5	5	5	5	5	5	5	5
4	4	5	3	4	3	4	3	4	1	1	1	1	1	1	1	2	1	3	3	2	3	2	3	3	4	2	5	5	5	5	5	4	5	5	5
4	4	5	5	5	4	4	5	5	2	2	2	2	1	2	1	1	1	4	4	3	4	4	3	4	3	1	5	5	5	4	5	5	5	5	5
5	4	4	4	4	5	3	4	4	1	1	1	1	3	2	2	1	1	3	3	3	3	2	3	4	1	2	5	5	5	5	5	5	4	5	5
4	3	4	3	3	3	3	3	4	1	1	1	1	2	1	1	1	1	3	3	1	3	2	2	3	4	4	5	5	5	4	5	5	5	5	5
5	5	4	4	4	4	5	4	5	3	3	1	1	1	1	1	1	2	4	3	4	4	3	3	4	4	2	5	5	5	5	5	5	5	5	5
5	4	5	4	5	5	3	5	4	1	1	2	1	1	1	2	2	1	3	3	4	4	3	3	4	4	3	5	5	5	4	5	5	5	4	5
3	4	5	3	4	4	4	5	5	1	2	1	1	2	1	1	2	1	2	3	4	4	3	2	3	3	1	5	5	5	5	5	5	4	5	5
3	3	4	3	5	4	4	3	4	1	2	1	2	1	2	1	3	2	4	4	4	4	4	2	3	2	1	5	5	5	5	4	5	5	5	5
3	4	5	3	4	5	5	5	4	2	1	2	1	3	1	2	2	1	1	1	1	2	3	1	3	3	2	5	4	4	5	4	4	5	4	5
5	4	5	4	5	5	3	5	4	1	1	2	1	1	1	2	2	1	3	3	4	4	3	3	4	4	3	5	5	5	4	5	5	5	4	5
3	3	4	4	5	3	4	4	4	1	1	2	2	1	1	1	1	1	3	2	2	3	2	1	3	3	2	5	5	5	5	5	4	5	5	5
5	4	4	3	4	3	3	4	3	2	1	1	1	2	1	1	1	1	3	4	1	4	3	2	3	3	2	5	5	5	4	5	5	5	5	5
4	3	3	4	4	4	4	5	4	1	2	1	1	1	1	1	2	1	2	3	2	3	2	2	3	3	3	5	5	4	5	4	5	5	5	5
5	4	4	5	4	4	5	4	3	1	1	1	1	1	2	1	1	2	4	3	4	3	2	2	2	3	2	5	4	4	5	4	4	5	4	4
3	4	4	4	4	3	5	3	3	1	3	2	2	1	3	2	1	2	4	1	4	4	2	2	1	3	4	5	5	5	5	5	5	5	5	5
5	4	4	3	4	5	4	5	3	2	2	1	2	1	1	1	1	1	4	3	3	4	5	3	4	3	2	5	5	4	5	5	4	5	5	5
3	5	5	3	4	3	3	3	5	1	2	1	1	3	1	2	1	1	3	4	1	4	3	2	4	3	2	5	5	5	5	4	5	4	5	5
4	5	4	5	5	3	3	3	5	1	2	1	1	1	2	1	2	1	3	4	4	3	2	3	3	3	4	5	4	5	5	4	5	5	5	5
4	4	3	3	4	5	5	4	5	1	1	1	2	2	1	1	1	1	3	3	3	3	3	3	3	4	3	5	5	5	4	5	5	5	4	5
5	4	3	3	4	3	3	3	4	2	1	1	1	1	1	1	1	2	4	3	3	3	4	3	2	4	2	5	5	5	4	5	5	5	5	5
4	5	4	3	4	5	5	4	3	2	1	2	1	1	1	2	1	1	3	3	3	2	5	2	4	4	2	5	5	5	5	5	5	5	5	5
5	3	4	2	4	3	5	3	3	1	1	2	1	1	2	1	1	1	4	4	2	3	3	3	4	4	2	5	5	5	5	4	5	5	5	5
3	4	4	3	4	4	3	4	4	1	1	1	1	1	1	1	3	1	4	3	1	3	4	3	2	1	2	5	4	5	5	5	5	5	5	5
4	3	4	3	5	4	5	3	5	1	1	1	2	1	2	2	1	1	3	2	2	4	4	1	3	1	4	5	5	4	5	5	5	5	5	5
4	4	4	3	4	3	4	4	4	2	3	2	1	1	1	1	1	2	4	3	3	2	4	1	3	3	2	5	5	5	5	5	5	5	5	5
3	4	5	3	4	4	4	4	4	2	2	1	2	1	1	1	1	1	3	3	4	3	4	2	3	3	3	5	4	4	4	5	4	5	5	5
5	4	3	3	4	5	3	5	5	1	1	1	2	1	1	1	1	2	4	3	4	4	2	2	3	3	1	5	5	5	4	5	5	5	5	4
5	3	4	5	5	4	3	5	4	1	1	1	1	1	1	1	1	1	4	3	3	4	2	3	3	3	3	5	5	4	5	5	4	5	5	5
4	4	5	4	5	5	3	5	4	2	1	1	1	3	1	1	2	2	3	3	3	4	3	2	3	1	3	5	5	4	5	5	4	4	5	5
4	4	5	4	5	5	5	4	5	2	1	2	1	2	1	1	1	1	3	4	1	3	3	3	4	3	2	5	5	5	5	5	5	5	5	5
4	3	4	4	4	3	4	5	3	3	1	1	1	1	2	1	1	1	3	1	4	4	2	1	2	3	2	5	5	5	5	4	5	5	4	5
3	4	5	3	4	4	4	5	5	1	2	1	1	2	1	1	2	1	2	3	4	4	3	2	3	3	1	5	5	5	5	5	5	4	5	5
5	5	4	3	3	5	4	4	4	1	2	2	1	1	1	1	1	1	2	4	3	4	2	2	3	4	4	5	5	5	4	5	5	5	5	4
5	3	5	5	4	3	3	5	3	1	1	1	1	2	1	2	2	1	2	3	3	3	3	1	4	2	2	5	5	5	5	5	4	5	5	5
4	3	4	4	4	3	4	5	3	3	1	1	1	1	2	1	1	1	3	1	4	4	2	1	2	3	2	5	5	5	5	4	5	5	4	5
WER
ours									baseline1									baseline2									baseline3
Participant1	Participant2	Participant3	Participant4	Participant5	Participant6	Participant7	Participant8	Participant9	Participant1	Participant2	Participant3	Participant4	Participant5	Participant6	Participant7	Participant8	Participant9	Participant1	Participant2	Participant3	Participant4	Participant5	Participant6	Participant7	Participant8	Participant9	Participant1	Participant2	Participant3	Participant4	Participant5	Participant6	Participant7	Participant8	Participant9
0	0	0.333333	0	0	0	0	0.333333	0	0.666667	1	0.666667	1	0.666667	1	0.666667	1	0.666667	0.333333	1	0	0	0.666667	0.333333	0.666667	0	0.666667	0	0	0.333333	0	0	0	0	0.333333	0
0	0.125	0.125	0.125	0.125	0.125	0.25	0.125	0.125	0.875	1	1	0.875	1	1	1	0.875	1	0.75	1	0.75	0.75	1	1	0.875	1	1	0	0.125	0.125	0.125	0.125	0.125	0.25	0.125	0.125
0.222222	0.111111	0.222222	0.333333	0.111111	0.111111	0.222222	0.333333	0.222222	1	0.888889	1	1	1	1	1	1	1	0.666667	0.666667	1	0.888889	0.888889	0.777778	0.666667	0.777778	0.777778	0.222222	0.111111	0.222222	0.222222	0.111111	0.111111	0.222222	0.333333	0.222222
0.125	0.125	0.125	0.25	0.25	0.125	0.125	0.25	0.125	1	1	0.875	1	1	1	1	1	0.875	0.875	1	1	0.875	0.625	0.875	0.875	0.875	0.875	0.125	0.125	0.125	0.25	0.125	0.125	0.125	0.25	0
0.5	0.5	0.25	0.5	0	0.25	0.25	0.5	0.25	0.75	1	1	1	1	1	1	0.75	1	0.75	1	0.25	0.75	0.75	1	0.75	1	0.25	0.5	0.5	0.25	0.5	0	0.25	0.25	0.5	0.25
0.5	0.5	0	0.5	0.25	0	0	0	0.25	1	1	1	1	0.75	1	1	1	1	1	0.5	0.75	0.25	1	1	1	0.75	0.5	0.5	0.25	0	0.5	0.25	0	0	0	0.25
0.428571	0.142857	0.285714	0.428571	0.142857	0.285714	0.428571	0.428571	0.571429	1	0.857143	0.857143	0.857143	0.857143	1	0.857143	1	1	0.571429	1	0.857143	0.571429	0.857143	0.857143	1	0.714286	0.857143	0.428571	0.142857	0.285714	0.428571	0.142857	0.285714	0.285714	0.285714	0.571429
0.111111	0.222222	0	0.222222	0.111111	0.333333	0.222222	0.222222	0.333333	1	1	1	1	1	1	1	1	1	0.777778	0.888889	0.777778	1	0.666667	0.888889	0.666667	0.777778	0.666667	0.111111	0.222222	0	0.222222	0.111111	0.333333	0.222222	0.222222	0.333333
0.285714	0.285714	0.142857	0.285714	0.142857	0	0.142857	0.142857	0	0.857143	0.857143	1	1	1	1	1	1	1	0.571429	1	0.571429	0.857143	0.571429	0.714286	0.571429	1	0.857143	0.142857	0.285714	0.142857	0.285714	0.142857	0	0	0.142857	0
0.25	0	0	0.5	0	0.5	0.5	0.25	0	1	1	1	1	0.75	1	1	1	0.75	0.25	1	0.75	0.75	1	0.5	0.75	1	0.75	0.25	0	0	0.5	0	0.5	0.5	0.25	0
0.142857	0.142857	0	0.285714	0.142857	0.428571	0.142857	0.285714	0.142857	1	1	0.857143	1	1	1	1	0.857143	1	0.857143	0.857143	0.857143	1	1	0.714286	0.571429	0.571429	0.571429	0.142857	0.142857	0	0.285714	0.142857	0.285714	0.142857	0.285714	0.142857
0.25	0.25	0	0	0	0.25	0.25	0	0	1	1	1	0.75	1	0.75	0.75	0.75	1	0.5	1	0.5	0.25	1	0.5	0.5	1	0.5	0.25	0.25	0	0	0	0.25	0.25	0	0
0	0.166667	0.166667	0.166667	0.166667	0	0.333333	0.166667	0.166667	0.833333	0.833333	1	1	1	1	1	1	0.833333	1	1	1	0.5	1	0.833333	0.833333	0.833333	1	0	0.166667	0.166667	0.166667	0.166667	0	0.333333	0.166667	0.166667
0.1	0.3	0.2	0.2	0.3	0.2	0.2	0.3	0.1	1	1	0.9	1	1	0.9	1	0.9	0.9	0.7	0.7	0.8	0.9	0.9	0.9	1	1	1	0.1	0.3	0.1	0.2	0.2	0.2	0.2	0.3	0.1
0	0	0.25	0.25	0.25	0.25	0	0.25	0	0.75	1	1	1	1	1	1	1	0.75	0.75	1	0.5	0.25	1	1	0.75	0.25	0.25	0	0	0.25	0.25	0.25	0.25	0	0.25	0
0	0.25	0	0.25	0	0	0.5	0	0.5	1	1	0.75	1	1	1	1	1	1	0.75	0.25	1	0.25	0.25	0.25	1	0.25	0.25	0	0.25	0	0.25	0	0	0.5	0	0.25
0.5	0.333333	0.166667	0.166667	0	0.333333	0.166667	0.333333	0.166667	0.833333	1	1	0.833333	0.833333	0.833333	1	1	1	1	0.5	0.5	1	0.833333	0.666667	0.833333	0.833333	0.5	0.5	0.333333	0.166667	0.166667	0	0.333333	0.166667	0.166667	0.166667
0.1	0.1	0.1	0.2	0.1	0.4	0.3	0.1	0.2	1	1	1	1	1	1	1	0.9	1	0.9	1	0.7	0.7	1	0.7	1	0.8	1	0	0.1	0.1	0.2	0.1	0.4	0.3	0.1	0.2
0.166667	0.333333	0.333333	0.166667	0.166667	0.166667	0.166667	0	0.166667	1	1	1	1	1	1	1	1	0.833333	1	0.833333	1	0.666667	1	0.666667	0.666667	0.833333	0.666667	0.166667	0.333333	0.333333	0.166667	0.166667	0.166667	0.166667	0	0.166667
0	0.166667	0.166667	0.166667	0.166667	0.166667	0	0.166667	0.333333	1	0.833333	1	1	1	1	1	1	1	1	1	0.666667	0.833333	0.5	0.5	0.5	0.5	0.5	0	0.166667	0.166667	0	0.166667	0.166667	0	0.166667	0.333333
0.25	0	0	0.5	0	0.5	0.5	0.25	0	1	1	1	1	0.75	1	1	1	0.75	0.25	1	0.75	0.75	1	0.5	0.75	1	0.75	0.25	0	0	0.5	0	0.5	0.5	0.25	0
0	0	0.25	0.25	0.25	0.25	0	0.25	0	0.75	1	1	1	1	1	1	1	0.75	0.75	1	0.5	0.25	1	1	0.75	0.25	0.25	0	0	0.25	0.25	0.25	0.25	0	0.25	0
0.428571	0.142857	0.285714	0.428571	0.142857	0.285714	0.428571	0.428571	0.571429	1	0.857143	0.857143	0.857143	0.857143	1	0.857143	1	1	0.571429	1	0.857143	0.571429	0.857143	0.857143	1	0.714286	0.857143	0.428571	0.142857	0.285714	0.428571	0.142857	0.285714	0.285714	0.285714	0.571429
0.111111	0.222222	0	0.222222	0.111111	0.333333	0.222222	0.222222	0.333333	1	1	1	1	1	1	1	1	1	0.777778	0.888889	0.777778	1	0.666667	0.888889	0.666667	0.777778	0.666667	0.111111	0.222222	0	0.222222	0.111111	0.333333	0.222222	0.222222	0.333333
0	0.166667	0.166667	0.166667	0.166667	0.166667	0	0.166667	0.333333	1	0.833333	1	1	1	1	1	1	1	1	1	0.666667	0.833333	0.5	0.5	0.5	0.5	0.5	0	0.166667	0.166667	0	0.166667	0.166667	0	0.166667	0.333333
0.5	0.333333	0.166667	0.166667	0	0.333333	0.166667	0.333333	0.166667	0.833333	1	1	0.833333	0.833333	0.833333	1	1	1	1	0.5	0.5	1	0.833333	0.666667	0.833333	0.833333	0.5	0.5	0.333333	0.166667	0.166667	0	0.333333	0.166667	0.166667	0.166667
0.1	0.1	0.1	0.2	0.1	0.4	0.3	0.1	0.2	1	1	1	1	1	1	1	0.9	1	0.9	1	0.7	0.7	1	0.7	1	0.8	1	0	0.1	0.1	0.2	0.1	0.4	0.3	0.1	0.2
0.5	0.5	0	0.5	0.25	0	0	0	0.25	1	1	1	1	0.75	1	1	1	1	1	0.5	0.75	0.25	1	1	1	0.75	0.5	0.5	0.25	0	0.5	0.25	0	0	0	0.25
0.1	0.3	0.2	0.2	0.3	0.2	0.2	0.3	0.1	1	1	0.9	1	1	0.9	1	0.9	0.9	0.7	0.7	0.8	0.9	0.9	0.9	1	1	1	0.1	0.3	0.1	0.2	0.2	0.2	0.2	0.3	0.1
0	0.25	0	0.25	0	0	0.5	0	0.5	1	1	0.75	1	1	1	1	1	1	0.75	0.25	1	0.25	0.25	0.25	1	0.25	0.25	0	0.25	0	0.25	0	0	0.5	0	0.25
0.142857	0.142857	0	0.285714	0.142857	0.428571	0.142857	0.285714	0.142857	1	1	0.857143	1	1	1	1	0.857143	1	0.857143	0.857143	0.857143	1	1	0.714286	0.571429	0.571429	0.571429	0.142857	0.142857	0	0.285714	0.142857	0.285714	0.142857	0.285714	0.142857
0.125	0.125	0.125	0.25	0.25	0.125	0.125	0.25	0.125	1	1	0.875	1	1	1	1	1	0.875	0.875	1	1	0.875	0.625	0.875	0.875	0.875	0.875	0.125	0.125	0.125	0.25	0.125	0.125	0.125	0.25	0
0	0.125	0.125	0.125	0.125	0.125	0.25	0.125	0.125	0.875	1	1	0.875	1	1	1	0.875	1	0.75	1	0.75	0.75	1	1	0.875	1	1	0	0.125	0.125	0.125	0.125	0.125	0.25	0.125	0.125
0.5	0.5	0.25	0.5	0	0.25	0.25	0.5	0.25	0.75	1	1	1	1	1	1	0.75	1	0.75	1	0.25	0.75	0.75	1	0.75	1	0.25	0.5	0.5	0.25	0.5	0	0.25	0.25	0.5	0.25
0.285714	0.285714	0.142857	0.285714	0.142857	0	0.142857	0.142857	0	0.857143	0.857143	1	1	1	1	1	1	1	0.571429	1	0.571429	0.857143	0.571429	0.714286	0.571429	1	0.857143	0.142857	0.285714	0.142857	0.285714	0.142857	0	0	0.142857	0
0.25	0.25	0	0	0	0.25	0.25	0	0	1	1	1	0.75	1	0.75	0.75	0.75	1	0.5	1	0.5	0.25	1	0.5	0.5	1	0.5	0.25	0.25	0	0	0	0.25	0.25	0	0
0.222222	0.111111	0.222222	0.333333	0.111111	0.111111	0.222222	0.333333	0.222222	1	0.888889	1	1	1	1	1	1	1	0.666667	0.666667	1	0.888889	0.888889	0.777778	0.666667	0.777778	0.777778	0.222222	0.111111	0.222222	0.222222	0.111111	0.111111	0.222222	0.333333	0.222222
0	0	0.333333	0	0	0	0	0.333333	0	0.666667	1	0.666667	1	0.666667	1	0.666667	1	0.666667	0.333333	1	0	0	0.666667	0.333333	0.666667	0	0.666667	0	0	0.333333	0	0	0	0	0.333333	0
0	0.166667	0.166667	0.166667	0.166667	0	0.333333	0.166667	0.166667	0.833333	0.833333	1	1	1	1	1	1	0.833333	1	1	1	0.5	1	0.833333	0.833333	0.833333	1	0	0.166667	0.166667	0.166667	0.166667	0	0.333333	0.166667	0.166667
0.166667	0.333333	0.333333	0.166667	0.166667	0.166667	0.166667	0	0.166667	1	1	1	1	1	1	1	1	0.833333	1	0.833333	1	0.666667	1	0.666667	0.666667	0.833333	0.666667	0.166667	0.333333	0.333333	0.166667	0.166667	0.166667	0.166667	0	0.166667
0	0.166667	0.166667	0.166667	0.166667	0.166667	0	0.166667	0.333333	1	0.833333	1	1	1	1	1	1	1	1	1	0.666667	0.833333	0.5	0.5	0.5	0.5	0.5	0	0.166667	0.166667	0	0.166667	0.166667	0	0.166667	0.333333
0.125	0.125	0.125	0.25	0.25	0.125	0.125	0.25	0.125	1	1	0.875	1	1	1	1	1	0.875	0.875	1	1	0.875	0.625	0.875	0.875	0.875	0.875	0.125	0.125	0.125	0.25	0.125	0.125	0.125	0.25	0
0.285714	0.285714	0.142857	0.285714	0.142857	0	0.142857	0.142857	0	0.857143	0.857143	1	1	1	1	1	1	1	0.571429	1	0.571429	0.857143	0.571429	0.714286	0.571429	1	0.857143	0.142857	0.285714	0.142857	0.285714	0.142857	0	0	0.142857	0
0.1	0.1	0.1	0.2	0.1	0.4	0.3	0.1	0.2	1	1	1	1	1	1	1	0.9	1	0.9	1	0.7	0.7	1	0.7	1	0.8	1	0	0.1	0.1	0.2	0.1	0.4	0.3	0.1	0.2
0.25	0	0	0.5	0	0.5	0.5	0.25	0	1	1	1	1	0.75	1	1	1	0.75	0.25	1	0.75	0.75	1	0.5	0.75	1	0.75	0.25	0	0	0.5	0	0.5	0.5	0.25	0
0	0.166667	0.166667	0.166667	0.166667	0	0.333333	0.166667	0.166667	0.833333	0.833333	1	1	1	1	1	1	0.833333	1	1	1	0.5	1	0.833333	0.833333	0.833333	1	0	0.166667	0.166667	0.166667	0.166667	0	0.333333	0.166667	0.166667
0.5	0.5	0	0.5	0.25	0	0	0	0.25	1	1	1	1	0.75	1	1	1	1	1	0.5	0.75	0.25	1	1	1	0.75	0.5	0.5	0.25	0	0.5	0.25	0	0	0	0.25
0	0	0.25	0.25	0.25	0.25	0	0.25	0	0.75	1	1	1	1	1	1	1	0.75	0.75	1	0.5	0.25	1	1	0.75	0.25	0.25	0	0	0.25	0.25	0.25	0.25	0	0.25	0
0.428571	0.142857	0.285714	0.428571	0.142857	0.285714	0.428571	0.428571	0.571429	1	0.857143	0.857143	0.857143	0.857143	1	0.857143	1	1	0.571429	1	0.857143	0.571429	0.857143	0.857143	1	0.714286	0.857143	0.428571	0.142857	0.285714	0.428571	0.142857	0.285714	0.285714	0.285714	0.571429
0.1	0.3	0.2	0.2	0.3	0.2	0.2	0.3	0.1	1	1	0.9	1	1	0.9	1	0.9	0.9	0.7	0.7	0.8	0.9	0.9	0.9	1	1	1	0.1	0.3	0.1	0.2	0.2	0.2	0.2	0.3	0.1
0.142857	0.142857	0	0.285714	0.142857	0.428571	0.142857	0.285714	0.142857	1	1	0.857143	1	1	1	1	0.857143	1	0.857143	0.857143	0.857143	1	1	0.714286	0.571429	0.571429	0.571429	0.142857	0.142857	0	0.285714	0.142857	0.285714	0.142857	0.285714	0.142857
0.25	0.25	0	0	0	0.25	0.25	0	0	1	1	1	0.75	1	0.75	0.75	0.75	1	0.5	1	0.5	0.25	1	0.5	0.5	1	0.5	0.25	0.25	0	0	0	0.25	0.25	0	0
0	0	0.333333	0	0	0	0	0.333333	0	0.666667	1	0.666667	1	0.666667	1	0.666667	1	0.666667	0.333333	1	0	0	0.666667	0.333333	0.666667	0	0.666667	0	0	0.333333	0	0	0	0	0.333333	0
0.166667	0.333333	0.333333	0.166667	0.166667	0.166667	0.166667	0	0.166667	1	1	1	1	1	1	1	1	0.833333	1	0.833333	1	0.666667	1	0.666667	0.666667	0.833333	0.666667	0.166667	0.333333	0.333333	0.166667	0.166667	0.166667	0.166667	0	0.166667
0.5	0.333333	0.166667	0.166667	0	0.333333	0.166667	0.333333	0.166667	0.833333	1	1	0.833333	0.833333	0.833333	1	1	1	1	0.5	0.5	1	0.833333	0.666667	0.833333	0.833333	0.5	0.5	0.333333	0.166667	0.166667	0	0.333333	0.166667	0.166667	0.166667
0.5	0.5	0.25	0.5	0	0.25	0.25	0.5	0.25	0.75	1	1	1	1	1	1	0.75	1	0.75	1	0.25	0.75	0.75	1	0.75	1	0.25	0.5	0.5	0.25	0.5	0	0.25	0.25	0.5	0.25
0.222222	0.111111	0.222222	0.333333	0.111111	0.111111	0.222222	0.333333	0.222222	1	0.888889	1	1	1	1	1	1	1	0.666667	0.666667	1	0.888889	0.888889	0.777778	0.666667	0.777778	0.777778	0.222222	0.111111	0.222222	0.222222	0.111111	0.111111	0.222222	0.333333	0.222222
0.111111	0.222222	0	0.222222	0.111111	0.333333	0.222222	0.222222	0.333333	1	1	1	1	1	1	1	1	1	0.777778	0.888889	0.777778	1	0.666667	0.888889	0.666667	0.777778	0.666667	0.111111	0.222222	0	0.222222	0.111111	0.333333	0.222222	0.222222	0.333333
0	0.125	0.125	0.125	0.125	0.125	0.25	0.125	0.125	0.875	1	1	0.875	1	1	1	0.875	1	0.75	1	0.75	0.75	1	1	0.875	1	1	0	0.125	0.125	0.125	0.125	0.125	0.25	0.125	0.125
0	0.25	0	0.25	0	0	0.5	0	0.5	1	1	0.75	1	1	1	1	1	1	0.75	0.25	1	0.25	0.25	0.25	1	0.25	0.25	0	0.25	0	0.25	0	0	0.5	0	0.25
PER
ours									baseline1									baseline2									baseline3
Participant1	Participant2	Participant3	Participant4	Participant5	Participant6	Participant7	Participant8	Participant9	Participant1	Participant2	Participant3	Participant4	Participant5	Participant6	Participant7	Participant8	Participant9	Participant1	Participant2	Participant3	Participant4	Participant5	Participant6	Participant7	Participant8	Participant9	Participant1	Participant2	Participant3	Participant4	Participant5	Participant6	Participant7	Participant8	Participant9
0	0	0.166667	0	0	0	0	0.25	0	0.666667	0.583333	0.583333	0.666667	0.5	0.666667	0.5	0.416667	0.583333	0.25	0	0.333333	0.25	0	0.0833333	0.25	0	0	0	0	0.166667	0	0	0	0	0.25	0
0	0.03125	0.0625	0.03125	0.0625	0.0625	0.09375	0.0625	0.0625	0.6875	0.65625	0.6875	0.8125	0.625	0.78125	0.625	0.6875	0.84375	0.25	0.21875	0.3125	0.34375	0.21875	0.1875	0.34375	0.25	0.28125	0	0.0625	0.0625	0.03125	0.09375	0.0625	0.09375	0.0625	0.09375
0.151515	0.030303	0.121212	0.30303	0.151515	0.0909091	0.242424	0.181818	0.151515	0.818182	0.666667	0.636364	0.666667	0.848485	0.727273	0.757576	0.666667	0.666667	0.363636	0.272727	0.363636	0.242424	0.272727	0.333333	0.30303	0.242424	0.242424	0.212121	0.030303	0.121212	0.272727	0.151515	0.0909091	0.242424	0.181818	0.151515
0.0645161	0.0645161	0.0645161	0.129032	0.225806	0.0645161	0.129032	0.0967742	0.0645161	0.709677	0.806452	0.677419	0.709677	0.806452	0.612903	0.774194	0.83871	0.741935	0.193548	0.193548	0.258065	0.16129	0.322581	0.290323	0.225806	0.322581	0.354839	0.0322581	0.0645161	0.0645161	0.129032	0.0967742	0.0645161	0.0967742	0.0967742	0
0.238095	0.190476	0.0952381	0.333333	0	0.142857	0.142857	0.380952	0.238095	0.619048	0.761905	0.571429	0.761905	0.714286	0.809524	0.619048	0.761905	0.666667	0.190476	0.285714	0.380952	0.142857	0.190476	0.380952	0.238095	0.428571	0.428571	0.238095	0.190476	0.047619	0.285714	0	0.142857	0.142857	0.333333	0.190476
0.352941	0.411765	0	0.176471	0.352941	0	0	0	0.117647	0.647059	0.705882	0.529412	0.588235	0.588235	0.588235	0.588235	0.705882	0.647059	0.117647	0.294118	0.352941	0.411765	0.411765	0.352941	0.294118	0.294118	0.117647	0.235294	0.0588235	0	0.176471	0.235294	0	0	0	0.117647
0.307692	0.0769231	0.153846	0.269231	0.115385	0.192308	0.192308	0.269231	0.423077	0.730769	0.692308	0.807692	0.730769	0.615385	0.615385	0.615385	0.615385	0.846154	0.153846	0.230769	0.307692	0.269231	0.307692	0.307692	0.269231	0.346154	0.346154	0.307692	0.0769231	0.153846	0.269231	0.0769231	0.192308	0.192308	0.230769	0.5
0.03125	0.09375	0	0.125	0.0625	0.25	0.15625	0.1875	0.25	0.65625	0.65625	0.65625	0.71875	0.84375	0.625	0.71875	0.625	0.6875	0.25	0.28125	0.34375	0.28125	0.15625	0.25	0.28125	0.15625	0.21875	0.03125	0.09375	0	0.125	0.0625	0.21875	0.15625	0.15625	0.25
0.151515	0.121212	0.0909091	0.181818	0.121212	0	0.030303	0.0606061	0	0.787879	0.727273	0.606061	0.727273	0.818182	0.818182	0.848485	0.606061	0.787879	0.333333	0.333333	0.272727	0.272727	0.212121	0.363636	0.272727	0.181818	0.181818	0.030303	0.121212	0.0909091	0.181818	0.121212	0	0	0.0606061	0
0.133333	0	0	0.2	0	0.333333	0.266667	0.2	0	0.666667	0.733333	0.533333	0.733333	0.666667	0.533333	0.6	0.666667	0.666667	0.2	0.2	0.2	0.4	0.333333	0.266667	0.133333	0.333333	0.4	0.133333	0	0	0.266667	0	0.4	0.333333	0.2	0
0.0833333	0.0833333	0	0.208333	0.125	0.333333	0.0833333	0.25	0.0833333	0.625	0.666667	0.625	0.791667	0.625	0.708333	0.833333	0.75	0.708333	0.291667	0.166667	0.375	0.416667	0.333333	0.375	0.208333	0.416667	0.375	0.208333	0.0416667	0	0.166667	0.125	0.208333	0.0833333	0.25	0.0833333
0.1	0.05	0	0	0	0.15	0.1	0	0	0.65	0.55	0.8	0.7	0.65	0.6	0.6	0.75	0.65	0.25	0.35	0.2	0.3	0.25	0.4	0.25	0.25	0.35	0.1	0.05	0	0	0	0.15	0.1	0	0
0	0.0344828	0.0689655	0.0344828	0.0689655	0	0.310345	0.0689655	0.137931	0.793103	0.793103	0.689655	0.827586	0.655172	0.62069	0.689655	0.655172	0.655172	0.206897	0.37931	0.37931	0.344828	0.172414	0.344828	0.206897	0.206897	0.172414	0	0.0344828	0.0689655	0.0344828	0.0689655	0	0.310345	0.0689655	0.137931
0.03125	0.1875	0.09375	0.09375	0.25	0.15625	0.1875	0.1875	0.0625	0.6875	0.625	0.78125	0.75	0.8125	0.78125	0.71875	0.6875	0.71875	0.34375	0.25	0.28125	0.34375	0.15625	0.3125	0.21875	0.15625	0.28125	0.03125	0.21875	0.0625	0.09375	0.1875	0.15625	0.1875	0.1875	0.0625
0	0	0.285714	0.142857	0.142857	0.357143	0	0.142857	0	0.714286	0.714286	0.571429	0.571429	0.571429	0.571429	0.714286	0.714286	0.714286	0.214286	0.357143	0.5	0.0714286	0.214286	0.0714286	0.5	0.5	0.428571	0	0	0.214286	0.142857	0.142857	0.285714	0	0.142857	0
0	0.0625	0	0.1875	0	0	0.25	0	0.3125	0.5625	0.5625	0.5625	0.625	0.625	0.5625	0.5625	0.625	0.5625	0.3125	0.375	0.4375	0.3125	0.375	0.125	0.3125	0.3125	0.4375	0	0.0625	0	0.125	0	0	0.375	0	0.25
0.4	0.2	0.1	0	0	0.3	0.05	0.25	0.1	0.75	0.6	0.7	0.8	0.8	0.8	0.6	0.8	0.75	0.4	0.2	0.45	0.15	0.2	0.2	0.35	0.25	0.35	0.3	0.2	0.05	0	0	0.3	0.1	0.1	0.1
0.0606061	0.030303	0.0606061	0.151515	0.121212	0.363636	0.242424	0.0606061	0.151515	0.848485	0.727273	0.666667	0.666667	0.666667	0.848485	0.787879	0.69697	0.666667	0.181818	0.30303	0.333333	0.212121	0.272727	0.212121	0.363636	0.242424	0.30303	0	0.030303	0.0606061	0.151515	0.0909091	0.333333	0.242424	0.0606061	0.181818
0.0454545	0.181818	0.0909091	0.0454545	0.0909091	0.0909091	0.0909091	0	0.0454545	0.772727	0.681818	0.772727	0.772727	0.545455	0.727273	0.818182	0.636364	0.636364	0.227273	0.318182	0.409091	0.409091	0.136364	0.363636	0.363636	0.181818	0.409091	0.0454545	0.136364	0.0909091	0.0909091	0.0909091	0.0909091	0.0909091	0	0.0909091
0	0.0588235	0.117647	0.352941	0.117647	0.117647	0	0.176471	0.411765	0.588235	0.529412	0.647059	0.647059	0.764706	0.764706	0.588235	0.529412	0.647059	0.294118	0.352941	0.411765	0.235294	0.470588	0.352941	0.411765	0.235294	0.294118	0	0.0588235	0.117647	0.176471	0.117647	0.117647	0	0.117647	0.411765
0	0.03125	0.0625	0.03125	0.0625	0.0625	0.09375	0.0625	0.0625	0.6875	0.65625	0.6875	0.8125	0.625	0.78125	0.625	0.6875	0.84375	0.25	0.21875	0.3125	0.34375	0.21875	0.1875	0.34375	0.25	0.28125	0	0.0625	0.0625	0.03125	0.09375	0.0625	0.09375	0.0625	0.09375
0.1	0.05	0	0	0	0.15	0.1	0	0	0.65	0.55	0.8	0.7	0.65	0.6	0.6	0.75	0.65	0.25	0.35	0.2	0.3	0.25	0.4	0.25	0.25	0.35	0.1	0.05	0	0	0	0.15	0.1	0	0
0.238095	0.190476	0.0952381	0.333333	0	0.142857	0.142857	0.380952	0.238095	0.619048	0.761905	0.571429	0.761905	0.714286	0.809524	0.619048	0.761905	0.666667	0.190476	0.285714	0.380952	0.142857	0.190476	0.380952	0.238095	0.428571	0.428571	0.238095	0.190476	0.047619	0.285714	0	0.142857	0.142857	0.333333	0.190476
0.307692	0.0769231	0.153846	0.269231	0.115385	0.192308	0.192308	0.269231	0.423077	0.730769	0.692308	0.807692	0.730769	0.615385	0.615385	0.615385	0.615385	0.846154	0.153846	0.230769	0.307692	0.269231	0.307692	0.307692	0.269231	0.346154	0.346154	0.307692	0.0769231	0.153846	0.269231	0.0769231	0.192308	0.192308	0.230769	0.5
0.151515	0.121212	0.0909091	0.181818	0.121212	0	0.030303	0.0606061	0	0.787879	0.727273	0.606061	0.727273	0.818182	0.818182	0.848485	0.606061	0.787879	0.333333	0.333333	0.272727	0.272727	0.212121	0.363636	0.272727	0.181818	0.181818	0.030303	0.121212	0.0909091	0.181818	0.121212	0	0	0.0606061	0
0.03125	0.1875	0.09375	0.09375	0.25	0.15625	0.1875	0.1875	0.0625	0.6875	0.625	0.78125	0.75	0.8125	0.78125	0.71875	0.6875	0.71875	0.34375	0.25	0.28125	0.34375	0.15625	0.3125	0.21875	0.15625	0.28125	0.03125	0.21875	0.0625	0.09375	0.1875	0.15625	0.1875	0.1875	0.0625
0	0.0625	0	0.1875	0	0	0.25	0	0.3125	0.5625	0.5625	0.5625	0.625	0.625	0.5625	0.5625	0.625	0.5625	0.3125	0.375	0.4375	0.3125	0.375	0.125	0.3125	0.3125	0.4375	0	0.0625	0	0.125	0	0	0.375	0	0.25
0.133333	0	0	0.2	0	0.333333	0.266667	0.2	0	0.666667	0.733333	0.533333	0.733333	0.666667	0.533333	0.6	0.666667	0.666667	0.2	0.2	0.2	0.4	0.333333	0.266667	0.133333	0.333333	0.4	0.133333	0	0	0.266667	0	0.4	0.333333	0.2	0
0.151515	0.030303	0.121212	0.30303	0.151515	0.0909091	0.242424	0.181818	0.151515	0.818182	0.666667	0.636364	0.666667	0.848485	0.727273	0.757576	0.666667	0.666667	0.363636	0.272727	0.363636	0.242424	0.272727	0.333333	0.30303	0.242424	0.242424	0.212121	0.030303	0.121212	0.272727	0.151515	0.0909091	0.242424	0.181818	0.151515
0.4	0.2	0.1	0	0	0.3	0.05	0.25	0.1	0.75	0.6	0.7	0.8	0.8	0.8	0.6	0.8	0.75	0.4	0.2	0.45	0.15	0.2	0.2	0.35	0.25	0.35	0.3	0.2	0.05	0	0	0.3	0.1	0.1	0.1
0.352941	0.411765	0	0.176471	0.352941	0	0	0	0.117647	0.647059	0.705882	0.529412	0.588235	0.588235	0.588235	0.588235	0.705882	0.647059	0.117647	0.294118	0.352941	0.411765	0.411765	0.352941	0.294118	0.294118	0.117647	0.235294	0.0588235	0	0.176471	0.235294	0	0	0	0.117647
0.03125	0.09375	0	0.125	0.0625	0.25	0.15625	0.1875	0.25	0.65625	0.65625	0.65625	0.71875	0.84375	0.625	0.71875	0.625	0.6875	0.25	0.28125	0.34375	0.28125	0.15625	0.25	0.28125	0.15625	0.21875	0.03125	0.09375	0	0.125	0.0625	0.21875	0.15625	0.15625	0.25
0.0645161	0.0645161	0.0645161	0.129032	0.225806	0.0645161	0.129032	0.0967742	0.0645161	0.709677	0.806452	0.677419	0.709677	0.806452	0.612903	0.774194	0.83871	0.741935	0.193548	0.193548	0.258065	0.16129	0.322581	0.290323	0.225806	0.322581	0.354839	0.0322581	0.0645161	0.0645161	0.129032	0.0967742	0.0645161	0.0967742	0.0967742	0
0	0.0344828	0.0689655	0.0344828	0.0689655	0	0.310345	0.0689655	0.137931	0.793103	0.793103	0.689655	0.827586	0.655172	0.62069	0.689655	0.655172	0.655172	0.206897	0.37931	0.37931	0.344828	0.172414	0.344828	0.206897	0.206897	0.172414	0	0.0344828	0.0689655	0.0344828	0.0689655	0	0.310345	0.0689655	0.137931
0	0	0.166667	0	0	0	0	0.25	0	0.666667	0.583333	0.583333	0.666667	0.5	0.666667	0.5	0.416667	0.583333	0.25	0	0.333333	0.25	0	0.0833333	0.25	0	0	0	0	0.166667	0	0	0	0	0.25	0
0	0	0.285714	0.142857	0.142857	0.357143	0	0.142857	0	0.714286	0.714286	0.571429	0.571429	0.571429	0.571429	0.714286	0.714286	0.714286	0.214286	0.357143	0.5	0.0714286	0.214286	0.0714286	0.5	0.5	0.428571	0	0	0.214286	0.142857	0.142857	0.285714	0	0.142857	0
0.0454545	0.181818	0.0909091	0.0454545	0.0909091	0.0909091	0.0909091	0	0.0454545	0.772727	0.681818	0.772727	0.772727	0.545455	0.727273	0.818182	0.636364	0.636364	0.227273	0.318182	0.409091	0.409091	0.136364	0.363636	0.363636	0.181818	0.409091	0.0454545	0.136364	0.0909091	0.0909091	0.0909091	0.0909091	0.0909091	0	0.0909091
0.0833333	0.0833333	0	0.208333	0.125	0.333333	0.0833333	0.25	0.0833333	0.625	0.666667	0.625	0.791667	0.625	0.708333	0.833333	0.75	0.708333	0.291667	0.166667	0.375	0.416667	0.333333	0.375	0.208333	0.416667	0.375	0.208333	0.0416667	0	0.166667	0.125	0.208333	0.0833333	0.25	0.0833333
0	0.0588235	0.117647	0.352941	0.117647	0.117647	0	0.176471	0.411765	0.588235	0.529412	0.647059	0.647059	0.764706	0.764706	0.588235	0.529412	0.647059	0.294118	0.352941	0.411765	0.235294	0.470588	0.352941	0.411765	0.235294	0.294118	0	0.0588235	0.117647	0.176471	0.117647	0.117647	0	0.117647	0.411765
0.0606061	0.030303	0.0606061	0.151515	0.121212	0.363636	0.242424	0.0606061	0.151515	0.848485	0.727273	0.666667	0.666667	0.666667	0.848485	0.787879	0.69697	0.666667	0.181818	0.30303	0.333333	0.212121	0.272727	0.212121	0.363636	0.242424	0.30303	0	0.030303	0.0606061	0.151515	0.0909091	0.333333	0.242424	0.0606061	0.181818
0.0606061	0.030303	0.0606061	0.151515	0.121212	0.363636	0.242424	0.0606061	0.151515	0.848485	0.727273	0.666667	0.666667	0.666667	0.848485	0.787879	0.69697	0.666667	0.181818	0.30303	0.333333	0.212121	0.272727	0.212121	0.363636	0.242424	0.30303	0	0.030303	0.0606061	0.151515	0.0909091	0.333333	0.242424	0.0606061	0.181818
0.133333	0	0	0.2	0	0.333333	0.266667	0.2	0	0.666667	0.733333	0.533333	0.733333	0.666667	0.533333	0.6	0.666667	0.666667	0.2	0.2	0.2	0.4	0.333333	0.266667	0.133333	0.333333	0.4	0.133333	0	0	0.266667	0	0.4	0.333333	0.2	0
0	0.0344828	0.0689655	0.0344828	0.0689655	0	0.310345	0.0689655	0.137931	0.793103	0.793103	0.689655	0.827586	0.655172	0.62069	0.689655	0.655172	0.655172	0.206897	0.37931	0.37931	0.344828	0.172414	0.344828	0.206897	0.206897	0.172414	0	0.0344828	0.0689655	0.0344828	0.0689655	0	0.310345	0.0689655	0.137931
0	0.0588235	0.117647	0.352941	0.117647	0.117647	0	0.176471	0.411765	0.588235	0.529412	0.647059	0.647059	0.764706	0.764706	0.588235	0.529412	0.647059	0.294118	0.352941	0.411765	0.235294	0.470588	0.352941	0.411765	0.235294	0.294118	0	0.0588235	0.117647	0.176471	0.117647	0.117647	0	0.117647	0.411765
0	0.0625	0	0.1875	0	0	0.25	0	0.3125	0.5625	0.5625	0.5625	0.625	0.625	0.5625	0.5625	0.625	0.5625	0.3125	0.375	0.4375	0.3125	0.375	0.125	0.3125	0.3125	0.4375	0	0.0625	0	0.125	0	0	0.375	0	0.25
0	0	0.285714	0.142857	0.142857	0.357143	0	0.142857	0	0.714286	0.714286	0.571429	0.571429	0.571429	0.571429	0.714286	0.714286	0.714286	0.214286	0.357143	0.5	0.0714286	0.214286	0.0714286	0.5	0.5	0.428571	0	0	0.214286	0.142857	0.142857	0.285714	0	0.142857	0
0	0.03125	0.0625	0.03125	0.0625	0.0625	0.09375	0.0625	0.0625	0.6875	0.65625	0.6875	0.8125	0.625	0.78125	0.625	0.6875	0.84375	0.25	0.21875	0.3125	0.34375	0.21875	0.1875	0.34375	0.25	0.28125	0	0.0625	0.0625	0.03125	0.09375	0.0625	0.09375	0.0625	0.09375
0.151515	0.121212	0.0909091	0.181818	0.121212	0	0.030303	0.0606061	0	0.787879	0.727273	0.606061	0.727273	0.818182	0.818182	0.848485	0.606061	0.787879	0.333333	0.333333	0.272727	0.272727	0.212121	0.363636	0.272727	0.181818	0.181818	0.030303	0.121212	0.0909091	0.181818	0.121212	0	0	0.0606061	0
0.307692	0.0769231	0.153846	0.269231	0.115385	0.192308	0.192308	0.269231	0.423077	0.730769	0.692308	0.807692	0.730769	0.615385	0.615385	0.615385	0.615385	0.846154	0.153846	0.230769	0.307692	0.269231	0.307692	0.307692	0.269231	0.346154	0.346154	0.307692	0.0769231	0.153846	0.269231	0.0769231	0.192308	0.192308	0.230769	0.5
0.03125	0.1875	0.09375	0.09375	0.25	0.15625	0.1875	0.1875	0.0625	0.6875	0.625	0.78125	0.75	0.8125	0.78125	0.71875	0.6875	0.71875	0.34375	0.25	0.28125	0.34375	0.15625	0.3125	0.21875	0.15625	0.28125	0.03125	0.21875	0.0625	0.09375	0.1875	0.15625	0.1875	0.1875	0.0625
0.1	0.05	0	0	0	0.15	0.1	0	0	0.65	0.55	0.8	0.7	0.65	0.6	0.6	0.75	0.65	0.25	0.35	0.2	0.3	0.25	0.4	0.25	0.25	0.35	0.1	0.05	0	0	0	0.15	0.1	0	0
0.03125	0.09375	0	0.125	0.0625	0.25	0.15625	0.1875	0.25	0.65625	0.65625	0.65625	0.71875	0.84375	0.625	0.71875	0.625	0.6875	0.25	0.28125	0.34375	0.28125	0.15625	0.25	0.28125	0.15625	0.21875	0.03125	0.09375	0	0.125	0.0625	0.21875	0.15625	0.15625	0.25
0.151515	0.030303	0.121212	0.30303	0.151515	0.0909091	0.242424	0.181818	0.151515	0.818182	0.666667	0.636364	0.666667	0.848485	0.727273	0.757576	0.666667	0.666667	0.363636	0.272727	0.363636	0.242424	0.272727	0.333333	0.30303	0.242424	0.242424	0.212121	0.030303	0.121212	0.272727	0.151515	0.0909091	0.242424	0.181818	0.151515
0.4	0.2	0.1	0	0	0.3	0.05	0.25	0.1	0.75	0.6	0.7	0.8	0.8	0.8	0.6	0.8	0.75	0.4	0.2	0.45	0.15	0.2	0.2	0.35	0.25	0.35	0.3	0.2	0.05	0	0	0.3	0.1	0.1	0.1
0.238095	0.190476	0.0952381	0.333333	0	0.142857	0.142857	0.380952	0.238095	0.619048	0.761905	0.571429	0.761905	0.714286	0.809524	0.619048	0.761905	0.666667	0.190476	0.285714	0.380952	0.142857	0.190476	0.380952	0.238095	0.428571	0.428571	0.238095	0.190476	0.047619	0.285714	0	0.142857	0.142857	0.333333	0.190476
0.0833333	0.0833333	0	0.208333	0.125	0.333333	0.0833333	0.25	0.0833333	0.625	0.666667	0.625	0.791667	0.625	0.708333	0.833333	0.75	0.708333	0.291667	0.166667	0.375	0.416667	0.333333	0.375	0.208333	0.416667	0.375	0.208333	0.0416667	0	0.166667	0.125	0.208333	0.0833333	0.25	0.0833333
0.0645161	0.0645161	0.0645161	0.129032	0.225806	0.0645161	0.129032	0.0967742	0.0645161	0.709677	0.806452	0.677419	0.709677	0.806452	0.612903	0.774194	0.83871	0.741935	0.193548	0.193548	0.258065	0.16129	0.322581	0.290323	0.225806	0.322581	0.354839	0.0322581	0.0645161	0.0645161	0.129032	0.0967742	0.0645161	0.0967742	0.0967742	0
0.352941	0.411765	0	0.176471	0.352941	0	0	0	0.117647	0.647059	0.705882	0.529412	0.588235	0.588235	0.588235	0.588235	0.705882	0.647059	0.117647	0.294118	0.352941	0.411765	0.411765	0.352941	0.294118	0.294118	0.117647	0.235294	0.0588235	0	0.176471	0.235294	0	0	0	0.117647
0.0454545	0.181818	0.0909091	0.0454545	0.0909091	0.0909091	0.0909091	0	0.0454545	0.772727	0.681818	0.772727	0.772727	0.545455	0.727273	0.818182	0.636364	0.636364	0.227273	0.318182	0.409091	0.409091	0.136364	0.363636	0.363636	0.181818	0.409091	0.0454545	0.136364	0.0909091	0.0909091	0.0909091	0.0909091	0.0909091	0	0.0909091
0	0	0.166667	0	0	0	0	0.25	0	0.666667	0.583333	0.583333	0.666667	0.5	0.666667	0.5	0.416667	0.583333	0.25	0	0.333333	0.25	0	0.0833333	0.25	0	0	0	0	0.166667	0	0	0	0	0.25	0

## Sheet: fig4
panel A
0.935948	0.0143791	0.00130719	0.00392157	0.00261438	0	0.00130719	0.00130719	0.00522876	0.00261438	0.00392157	0.00130719	0	0	0	0.00130719	0	0	0	0	0.00130719	0	0	0.00130719	0	0	0.00130719	0	0	0	0	0	0	0	0	0.020915
0.0138889	0.897569	0.00434028	0.00173611	0.0130208	0.00173611	0.00434028	0.00347222	0.00347222	0.0078125	0.00694444	0.00173611	0	0	0.00173611	0.00260417	0	0.000868056	0	0	0	0.000868056	0	0	0.000868056	0.000868056	0	0	0.000868056	0	0.000868056	0	0.000868056	0.000868056	0	0.0286458
0.0175439	0.0467836	0.701754	0.0116959	0.0409357	0.0116959	0.00584795	0.00584795	0.0233918	0.0292398	0.0350877	0.00584795	0	0.00584795	0	0	0	0	0	0	0	0	0	0	0	0	0	0	0	0	0	0	0	0	0	0.0584795
0.00854701	0	0.00854701	0.820513	0.017094	0.00854701	0	0	0	0	0.00854701	0	0	0	0	0.034188	0	0	0	0	0	0	0	0.00854701	0	0	0	0	0	0	0	0	0.00854701	0	0	0.0769231
0	0	0.00347222	0	0.96875	0.0138889	0.00347222	0	0.00347222	0	0	0	0	0	0	0	0	0	0	0	0	0	0	0	0	0	0	0	0	0	0	0	0	0	0	0.00694444
0	0.010101	0.020202	0	0	0.919192	0	0	0	0	0	0	0	0	0	0	0	0	0	0	0	0	0.010101	0	0	0	0	0	0	0	0	0	0	0	0	0.040404
0	0.0222222	0	0	0	0	0.933333	0	0	0	0	0.0111111	0	0	0	0	0	0	0	0	0	0	0	0	0	0	0	0	0	0	0	0	0	0	0	0.0333333
0.00555556	0.00555556	0	0	0.0555556	0.00555556	0	0.905556	0	0	0.00555556	0.00555556	0	0	0	0	0	0	0	0	0	0	0	0	0	0	0	0	0	0	0	0	0	0	0	0.0111111
0.0133333	0	0.00444444	0	0	0.00888889	0	0	0.915556	0.00888889	0	0.00444444	0	0	0	0	0	0	0	0.00444444	0	0	0	0	0	0	0.00444444	0	0	0	0	0	0	0	0	0.0355556
0	0.0042735	0.0128205	0	0.0042735	0	0.0042735	0	0.00854701	0.918803	0	0.0042735	0	0	0	0	0	0	0	0	0	0	0	0	0	0	0	0	0	0	0	0.0042735	0	0	0	0.0384615
0	0	0	0	0	0	0	0	0	0	0.888889	0	0	0	0	0	0	0	0	0	0	0	0	0	0	0	0	0	0	0	0	0	0	0	0	0.111111
0	0	0.010101	0.010101	0	0	0.020202	0.010101	0	0	0	0.929293	0	0	0	0	0	0	0	0	0	0	0	0	0	0	0	0	0	0	0	0	0	0	0	0.020202
0	0	0	0	0	0	0	0	0	0	0	0	0.888889	0	0	0	0	0	0	0	0	0	0	0	0	0	0	0	0	0	0	0	0	0	0	0.111111
0	0	0	0	0	0	0	0	0	0	0	0	0	0.898148	0	0	0.00925926	0.00462963	0	0.00462963	0	0	0	0.00925926	0	0	0	0	0	0.00462963	0	0.00462963	0	0.00462963	0	0.0601852
0	0.00791557	0	0.00527704	0	0	0	0	0	0	0	0	0	0.00263852	0.963061	0	0	0.00263852	0	0.00263852	0	0	0	0	0	0	0	0	0	0	0.00263852	0	0	0	0	0.0131926
0	0.00617284	0	0.00308642	0	0	0	0	0	0	0	0	0	0	0.0246914	0.916667	0.00617284	0.00308642	0	0	0	0	0	0.00308642	0	0	0	0	0	0	0.00308642	0.00308642	0	0	0	0.0308642
0	0	0	0	0	0	0	0	0	0.00241546	0	0	0	0	0	0	0.929952	0.0144928	0	0	0	0	0	0	0	0	0.00241546	0	0	0	0	0	0	0	0.00241546	0.0483092
0	0	0	0	0	0	0.00322061	0	0	0	0	0	0	0	0.0128824	0	0.0112721	0.94525	0	0	0.00161031	0	0	0	0.00161031	0	0	0	0	0.00161031	0	0	0	0	0	0.0225443
0	0	0	0	0	0	0	0	0	0	0	0	0	0	0	0	0	0	0.950617	0	0	0	0	0	0	0	0	0	0	0	0	0	0	0	0	0.0493827
0	0	0	0	0	0	0	0	0	0	0	0	0.00555556	0	0	0	0	0	0	0.905556	0.00555556	0	0.00555556	0.00555556	0	0.00555556	0	0	0.00555556	0.00555556	0	0.00555556	0	0	0.0111111	0.0388889
0	0	0.00555556	0	0	0	0	0	0.00555556	0	0	0	0	0	0	0	0.00555556	0.0111111	0	0.0111111	0.861111	0.00555556	0	0.0111111	0.00555556	0	0.0111111	0	0	0.00555556	0.00555556	0	0.00555556	0.00555556	0	0.0444444
0	0	0	0	0	0	0	0	0	0	0	0	0	0	0	0	0	0	0	0.0123457	0	0.876543	0	0	0.037037	0	0	0.0123457	0	0	0	0.0123457	0	0	0.0123457	0.037037
0	0	0	0	0	0.00308642	0	0.00308642	0	0	0	0.00308642	0	0	0	0	0	0	0	0	0	0	0.959877	0	0	0	0.00308642	0	0	0	0	0	0	0	0	0.0277778
0.00236407	0	0	0	0.00236407	0	0	0	0	0	0	0	0	0.00236407	0.00236407	0.00472813	0	0.00236407	0	0.00472813	0.00236407	0	0	0.931442	0	0	0.00236407	0.00236407	0	0.00236407	0.00236407	0	0.00472813	0.00236407	0.00236407	0.0260047
0	0	0	0	0	0	0	0	0	0	0	0	0	0	0.00358423	0	0.00358423	0	0	0.00358423	0.00358423	0	0	0	0.939068	0	0	0	0	0.00358423	0	0.00358423	0	0	0.00358423	0.0358423
0	0	0	0	0	0	0	0	0	0	0	0	0	0	0	0	0	0	0	0	0	0.0444444	0	0.0222222	0	0.888889	0.0222222	0	0	0	0	0	0	0	0	0.0222222
0	0	0	0	0	0	0	0	0	0	0	0	0	0	0.00396825	0	0	0.00396825	0	0.00396825	0	0.00396825	0	0	0	0.00793651	0.956349	0	0	0	0	0	0.00396825	0	0	0.015873
0	0	0	0	0	0	0	0	0	0	0	0	0	0	0	0	0	0	0	0.0185185	0	0	0	0	0	0.0185185	0	0.925926	0	0	0	0	0	0	0	0.037037
0	0	0	0	0	0	0	0	0	0	0	0	0	0	0.0277778	0	0	0	0	0	0	0	0	0	0	0	0	0	0.833333	0	0.0277778	0	0	0	0	0.111111
0	0	0	0	0	0	0.00444444	0	0	0.00444444	0	0	0.00444444	0	0.0133333	0.00444444	0	0	0.00444444	0.00444444	0	0	0.00444444	0	0	0.00444444	0	0	0	0.902222	0	0.00444444	0	0.00444444	0	0.04
0	0	0	0	0	0.00806452	0	0	0	0	0	0	0	0	0	0	0	0.00806452	0	0	0	0	0.00806452	0	0	0	0	0	0	0	0.862903	0.00806452	0.00806452	0.00806452	0.00806452	0.0806452
0.00194932	0	0	0	0.00194932	0	0	0.00194932	0	0	0	0	0.00194932	0.00194932	0.00389864	0.00194932	0.00194932	0	0.00194932	0.00389864	0.00194932	0.00389864	0	0.00389864	0.00194932	0.00389864	0.00584795	0	0.00194932	0.00389864	0.00389864	0.900585	0.00389864	0.00584795	0.00779727	0.0272904
0	0	0	0	0	0	0	0	0	0	0	0	0	0	0	0.00194553	0	0	0	0	0	0.00194553	0.00194553	0	0	0	0.00194553	0	0	0.00194553	0	0.00389105	0.970817	0.00194553	0.00194553	0.0116732
0	0.00617284	0	0.00308642	0	0	0.00308642	0.00308642	0	0.00617284	0.00308642	0	0.00308642	0	0.00308642	0	0.00617284	0.00925926	0.00308642	0.00925926	0.00617284	0.00308642	0.00308642	0.00617284	0.00925926	0.00308642	0.00925926	0.00308642	0	0.00308642	0.00617284	0.0185185	0.0216049	0.799383	0.0154321	0.0339506
0	0	0.00694444	0	0	0	0	0	0	0	0	0	0	0	0.0138889	0	0	0	0.00694444	0	0	0	0.00694444	0	0	0	0	0.00694444	0	0.00694444	0	0.00694444	0.00694444	0.0138889	0.902778	0.0208333
0.0656371	0.111969	0.042471	0.027027	0.011583	0.00772201	0.00772201	0.015444	0.030888	0.027027	0	0.019305	0.011583	0.019305	0.034749	0.03861	0.046332	0.0733591	0.00772201	0.027027	0.019305	0.015444	0.030888	0.03861	0.034749	0	0.042471	0.00772201	0.003861	0.034749	0.00772201	0.046332	0.0579151	0.027027	0.00772201	0
panel B
0.338562	0.152941	0.0248366	0.0418301	0.0130719	0.00261438	0.020915	0.0156863	0.0601307	0.0352941	0.0405229	0.0143791	0.00130719	0.00130719	0.00261438	0.00784314	0.00261438	0.00130719	0.00261438	0.00392157	0.00784314	0.00261438	0.00130719	0.00522876	0.00392157	0.00261438	0.00522876	0.00130719	0.00261438	0	0.00261438	0.00130719	0.00130719	0.00130719	0.00392157	0.172549
0.0694444	0.354167	0.0199653	0.0104167	0.0642361	0.0112847	0.0208333	0.0190972	0.015625	0.0407986	0.0355903	0.0104167	0.000868056	0.00173611	0.0121528	0.0138889	0.00347222	0.0078125	0.00173611	0.000868056	0.00173611	0.00520833	0.00173611	0.00260417	0.00607639	0.00694444	0.00347222	0.00173611	0.00434028	0.00347222	0.00520833	0.00347222	0.00520833	0.00434028	0.00347222	0.226562
0.0116959	0.0350877	0.19883	0.0116959	0.0292398	0.0116959	0.00584795	0.00584795	0.0175439	0.0175439	0.0233918	0.00584795	0	0.0116959	0	0	0	0	0.00584795	0.00584795	0	0	0.00584795	0.00584795	0	0	0	0.00584795	0	0	0	0	0	0.00584795	0.00584795	0.573099
0.025641	0	0.025641	0.290598	0.042735	0.025641	0.00854701	0	0	0.017094	0.025641	0.00854701	0.00854701	0.00854701	0.00854701	0.0683761	0.00854701	0.00854701	0	0.00854701	0.00854701	0	0.00854701	0.025641	0	0	0.00854701	0.00854701	0	0.00854701	0.00854701	0.00854701	0.025641	0.00854701	0.017094	0.273504
0	0	0.0277778	0.0138889	0.357639	0.0694444	0.00694444	0.0104167	0.0173611	0.00694444	0	0.00347222	0.0104167	0.0243056	0.00347222	0.00347222	0.0138889	0.0104167	0.0138889	0.0138889	0.0208333	0.0208333	0.00694444	0	0.0208333	0.0104167	0	0.00347222	0.0138889	0.0208333	0.0104167	0.00694444	0.0138889	0.00347222	0.00694444	0.232639
0.010101	0.040404	0.0505051	0	0.010101	0.323232	0	0.010101	0.020202	0.010101	0	0.010101	0.010101	0	0	0.010101	0	0.010101	0	0	0.010101	0	0.010101	0	0	0.010101	0.010101	0	0.010101	0.010101	0.010101	0	0.010101	0.010101	0.010101	0.383838
0.0111111	0.0333333	0.0111111	0.0111111	0.0111111	0	0.322222	0.0111111	0	0.0111111	0.0111111	0.0222222	0.0111111	0	0.0111111	0	0	0.0111111	0.0222222	0.0222222	0.0111111	0.0111111	0.0222222	0	0.0111111	0.0111111	0	0.0111111	0.0111111	0	0.0111111	0.0111111	0.0111111	0	0.0111111	0.333333
0.0166667	0.0222222	0.00555556	0.00555556	0.166667	0.0333333	0.0166667	0.283333	0.0111111	0.00555556	0.0277778	0.0166667	0	0.00555556	0	0.00555556	0.00555556	0.00555556	0	0	0	0.00555556	0	0.00555556	0	0.00555556	0	0	0	0	0	0	0	0	0.00555556	0.344444
0.0177778	0	0.00444444	0.00444444	0	0.0177778	0	0.00444444	0.293333	0.0133333	0.00444444	0.00888889	0	0.00444444	0.00444444	0.00444444	0.00444444	0	0.00444444	0.0133333	0	0.0133333	0.00444444	0.00444444	0.00888889	0.00888889	0.0222222	0.00888889	0.0133333	0.00888889	0.00888889	0.0133333	0.00888889	0.00888889	0.0133333	0.448889
0.00854701	0.0384615	0.0726496	0.00854701	0.034188	0	0.034188	0.017094	0.0641026	0.350427	0.017094	0.0299145	0.0042735	0.00854701	0.0042735	0	0.00854701	0	0	0	0.0042735	0.00854701	0	0.00854701	0.0042735	0.00854701	0.0042735	0	0	0.00854701	0	0.0128205	0.0042735	0.0042735	0.00854701	0.222222
0	0	0	0	0	0	0	0	0	0	0.222222	0	0	0	0.111111	0	0	0.111111	0	0.111111	0	0	0	0	0	0	0	0	0	0.111111	0	0.111111	0	0	0.111111	0.111111
0	0	0.020202	0.020202	0.010101	0.020202	0.0606061	0.030303	0.020202	0.020202	0.020202	0.282828	0	0.010101	0	0	0	0	0.010101	0	0	0	0	0	0	0	0	0.010101	0.010101	0	0.010101	0	0	0	0	0.444444
0.0493827	0.0123457	0.037037	0.037037	0	0.0246914	0	0	0.037037	0.037037	0.037037	0	0.333333	0.0123457	0.0123457	0	0.0123457	0.0123457	0.0123457	0.0123457	0	0	0	0	0	0.0123457	0	0.0123457	0	0.0123457	0.0123457	0.0123457	0	0	0	0.259259
0.00462963	0.00462963	0.00462963	0	0.00462963	0.00462963	0.00462963	0.00462963	0.00462963	0.00462963	0.00462963	0.00462963	0.00462963	0.356481	0	0.00462963	0.0185185	0.00925926	0.00462963	0.00925926	0.00462963	0	0.00462963	0.0185185	0.00462963	0.00462963	0.00462963	0.00462963	0.00462963	0.00925926	0.00925926	0.0138889	0	0.00925926	0.00462963	0.444444
0.00529101	0.026455	0.0026455	0.021164	0.00529101	0.00793651	0.0026455	0.00529101	0.0026455	0.00529101	0.00529101	0.0026455	0.0026455	0.00793651	0.277778	0.00529101	0.00793651	0.015873	0	0.0026455	0.00529101	0.0026455	0.00793651	0.00529101	0.00793651	0.0026455	0.0026455	0.00529101	0.00793651	0.00529101	0.00793651	0.0026455	0.0026455	0.00529101	0.00793651	0.507937
0.0123457	0.0401235	0.0154321	0.0216049	0.00308642	0.00308642	0.00925926	0.00617284	0.00617284	0.00925926	0.00617284	0	0.00308642	0.0123457	0.117284	0.305556	0.0308642	0.0216049	0.0123457	0	0	0.0123457	0.00617284	0.0154321	0.00925926	0.00308642	0	0.00308642	0.0123457	0.0123457	0.0216049	0.0185185	0.00308642	0	0.00617284	0.240741
0	0	0.00724638	0.00483092	0.00483092	0.00241546	0.00241546	0.00241546	0.00483092	0.00966184	0	0	0	0.00483092	0.00966184	0.00724638	0.272947	0.111111	0.0169082	0.00483092	0.00483092	0.0120773	0.00966184	0.0169082	0.0120773	0.0169082	0.031401	0.0144928	0.00483092	0.0120773	0.00241546	0.0120773	0.00483092	0.0144928	0.02657	0.338164
0	0.00644122	0.00644122	0.00805153	0.00483092	0.00644122	0.0193237	0.00322061	0.00805153	0	0.00161031	0.00644122	0.00805153	0.00644122	0.0724638	0.00483092	0.0676329	0.347826	0.00322061	0.00483092	0.0112721	0.00644122	0.00805153	0.00322061	0.0128824	0.00322061	0.00322061	0.00161031	0.00644122	0.0128824	0.00805153	0.00966184	0.00483092	0.00966184	0	0.312399
0.0123457	0	0.0123457	0	0.0123457	0	0	0	0	0.0123457	0.0123457	0	0	0.0123457	0.0123457	0.0123457	0.0123457	0.0123457	0.37037	0.037037	0.0123457	0.0246914	0	0.037037	0.037037	0	0.0123457	0.0493827	0	0.0123457	0	0.037037	0	0.0246914	0	0.222222
0	0.0111111	0.0166667	0.0166667	0.00555556	0.0166667	0.0111111	0.00555556	0.0111111	0	0.0111111	0.0166667	0.0222222	0.00555556	0	0.0166667	0.0111111	0.0111111	0	0.255556	0.0277778	0.00555556	0.0333333	0.0333333	0.00555556	0.0277778	0.0111111	0.0166667	0.0277778	0.0333333	0	0.0222222	0.00555556	0.0111111	0.0555556	0.238889
0	0.00555556	0.0111111	0	0.00555556	0	0	0	0.0111111	0.00555556	0.00555556	0.00555556	0.00555556	0.0111111	0.00555556	0	0.0166667	0.0277778	0.00555556	0.0277778	0.35	0.0222222	0.00555556	0.0277778	0.0222222	0.0111111	0.0277778	0.0111111	0	0.0166667	0.0111111	0.0111111	0.0166667	0.0166667	0.0111111	0.288889
0.0123457	0	0	0	0.0123457	0	0	0	0.0123457	0.0123457	0	0	0.0123457	0	0	0	0	0	0	0.0123457	0	0.333333	0	0	0.0246914	0.0123457	0	0.0123457	0	0.0123457	0.0123457	0.0123457	0	0.0123457	0.0123457	0.481481
0.00925926	0.00308642	0.0123457	0.00925926	0.00617284	0.0277778	0	0.0246914	0	0.0123457	0.00308642	0.0246914	0.0246914	0.00308642	0.00925926	0.0123457	0.0246914	0.00925926	0.0277778	0.00308642	0.00617284	0.00925926	0.280864	0.0246914	0.0154321	0.0246914	0.0277778	0.0123457	0.0154321	0.0185185	0.0185185	0.00308642	0.0277778	0.0154321	0.0154321	0.237654
0.0260047	0.00472813	0.00472813	0.00472813	0.0212766	0.00945626	0.00472813	0.00945626	0.0070922	0.0165485	0.0118203	0.00472813	0.00945626	0.0260047	0.0189125	0.0330969	0.00236407	0.0165485	0.00472813	0.0330969	0.0236407	0.00236407	0.00236407	0.338061	0.0141844	0.0070922	0.0189125	0.0141844	0.0070922	0.0283688	0.0189125	0.00236407	0.0378251	0.0165485	0.0212766	0.177305
0.00716846	0	0.0107527	0.00358423	0.0107527	0.00358423	0.00716846	0	0.00358423	0.0107527	0.00716846	0.00358423	0.0143369	0.0107527	0.0179211	0.00716846	0.0215054	0.0143369	0.00358423	0.0179211	0.0250896	0.0107527	0.00716846	0.00716846	0.308244	0.00716846	0.0107527	0.00358423	0.00716846	0.0286738	0.00358423	0.0215054	0.0107527	0	0.0215054	0.351254
0.0222222	0	0	0	0	0	0.0222222	0	0	0	0	0	0.0222222	0	0	0.0222222	0.0222222	0	0	0.0222222	0	0.0666667	0	0.0222222	0.0222222	0.311111	0.0444444	0	0	0	0.0222222	0	0	0	0	0.377778
0.00396825	0.00793651	0.00396825	0.00396825	0	0.00396825	0.00396825	0.00396825	0.00396825	0.00793651	0.00396825	0.00793651	0.00793651	0	0.0119048	0.00396825	0.00793651	0.00793651	0.00396825	0.00793651	0.00396825	0.00793651	0.00396825	0.00396825	0.00396825	0.015873	0.361111	0.00396825	0.00396825	0	0	0.00396825	0.0119048	0	0	0.468254
0.0185185	0.0185185	0.0185185	0.0185185	0.0185185	0.0185185	0.0185185	0	0.0185185	0.0185185	0.0185185	0	0.0185185	0.0185185	0.0185185	0	0.0185185	0.0185185	0.0185185	0.037037	0.0185185	0.0185185	0.0185185	0	0.0185185	0.0185185	0	0.333333	0.0185185	0	0.0185185	0.0185185	0.0185185	0	0	0.166667
0	0.0277778	0	0.0277778	0.0277778	0.0277778	0	0.0277778	0	0.0277778	0.0277778	0.0277778	0	0	0.0277778	0.0277778	0	0	0	0	0.0277778	0.0277778	0	0	0	0	0	0	0.222222	0	0.0277778	0	0	0.0277778	0	0.388889
0	0.00444444	0.00444444	0.00444444	0	0.00444444	0.0133333	0.00444444	0.00444444	0.00888889	0.00444444	0.00444444	0.0133333	0.00444444	0.0444444	0.0222222	0	0.00888889	0.0177778	0.0133333	0.00888889	0.0133333	0.0133333	0.00888889	0	0.0222222	0.00888889	0.00888889	0.00444444	0.351111	0.00888889	0.0177778	0.00888889	0.0133333	0.00444444	0.324444
0.016129	0.016129	0.016129	0.00806452	0.00806452	0.0322581	0.016129	0.00806452	0.016129	0.00806452	0.00806452	0.00806452	0	0.016129	0.016129	0.00806452	0.00806452	0.0322581	0	0.00806452	0.016129	0.00806452	0.0241935	0.016129	0	0.016129	0.00806452	0.016129	0.016129	0.00806452	0.298387	0.0241935	0.0241935	0.0322581	0.016129	0.225806
0.00584795	0	0.00389864	0.00389864	0.00779727	0.00194932	0.00389864	0.00974659	0.00194932	0.00194932	0.00389864	0.00389864	0.0155945	0.00974659	0.0233918	0.0136452	0.0175439	0.00584795	0.0136452	0.0253411	0.0155945	0.0233918	0.00389864	0.0136452	0.0116959	0.0194932	0.0331384	0.00974659	0.0175439	0.0214425	0.0272904	0.345029	0.0253411	0.0311891	0.0409357	0.187135
0.00389105	0.0291829	0.0252918	0.00389105	0.0330739	0.0272374	0.0175097	0.00389105	0.0350195	0.0194553	0.0194553	0.0077821	0.00389105	0	0.00389105	0.0175097	0.00583658	0	0.00972763	0.00972763	0.0077821	0.00194553	0.0175097	0.00194553	0.00389105	0.0077821	0.00972763	0.00583658	0.0077821	0.0194553	0.00583658	0.0311284	0.326848	0.0214008	0.0155642	0.2393
0	0.0154321	0	0.00617284	0.00308642	0.00617284	0.00925926	0.00617284	0.00308642	0.0123457	0.00925926	0.00617284	0.00925926	0	0.00617284	0.00308642	0.0123457	0.0154321	0.00617284	0.0154321	0.00925926	0.00617284	0.00617284	0.0123457	0.0123457	0.00617284	0.0154321	0.00617284	0.00308642	0.00925926	0.0123457	0.0277778	0.0339506	0.228395	0.0246914	0.441358
0.00694444	0	0.00694444	0.00694444	0.00694444	0.00694444	0.00694444	0.00694444	0.00694444	0.00694444	0.00694444	0	0.0138889	0.00694444	0.0277778	0.00694444	0	0	0.0208333	0.0138889	0.0138889	0.00694444	0.0138889	0.00694444	0.00694444	0.00694444	0	0.0208333	0	0.0208333	0.00694444	0.0138889	0.0138889	0.0347222	0.333333	0.340278
0.0637066	0.106178	0.0444015	0.027027	0.0135135	0.00772201	0.00965251	0.015444	0.0289575	0.027027	0	0.019305	0.011583	0.019305	0.034749	0.0405405	0.046332	0.0714286	0.00965251	0.027027	0.019305	0.015444	0.0289575	0.03861	0.034749	0.0019305	0.0405405	0.00965251	0.00579151	0.034749	0.00772201	0.0444015	0.0579151	0.027027	0.00965251	0
panel C
0.801307	0.0457516	0.00784314	0.0130719	0.00392157	0	0.00653595	0.00522876	0.0183007	0.0104575	0.0117647	0.00392157	0	0	0.00130719	0.00261438	0.00130719	0	0.00130719	0.00130719	0.00261438	0.00130719	0	0.00130719	0.00130719	0.00130719	0.00130719	0	0.00130719	0	0.00130719	0	0	0	0.00130719	0.0509804
0.0173611	0.841146	0.00520833	0.00260417	0.015625	0.00260417	0.00520833	0.00434028	0.00347222	0.0104167	0.00868056	0.00260417	0	0.000868056	0.00347222	0.00347222	0.000868056	0.00173611	0.000868056	0	0	0.000868056	0	0.000868056	0.00173611	0.00173611	0.000868056	0.000868056	0.000868056	0.000868056	0.000868056	0.000868056	0.00173611	0.000868056	0.000868056	0.0555556
0.0116959	0.0233918	0.461988	0.00584795	0.0175439	0.00584795	0.00584795	0.00584795	0.0116959	0.0116959	0.0175439	0.00584795	0	0.00584795	0	0	0	0	0.00584795	0.00584795	0	0	0.00584795	0	0	0	0	0	0	0	0	0	0	0.00584795	0.00584795	0.380117
0.00854701	0	0.00854701	0.700855	0.017094	0.00854701	0	0	0	0.00854701	0.017094	0.00854701	0.00854701	0.00854701	0	0.034188	0	0.00854701	0	0	0.00854701	0	0.00854701	0.00854701	0	0	0	0.00854701	0	0	0	0	0.00854701	0	0.00854701	0.111111
0	0	0.00694444	0.00347222	0.829861	0.0208333	0.00347222	0.00347222	0.00347222	0	0	0	0.00347222	0.00694444	0	0	0.00347222	0.00347222	0.00347222	0.00347222	0.00694444	0.00694444	0	0	0.00694444	0.00347222	0	0	0.00347222	0.00694444	0.00347222	0	0.00347222	0	0.00347222	0.0590278
0.010101	0.020202	0.020202	0	0.010101	0.747475	0	0	0.010101	0	0	0	0	0	0	0	0	0	0	0	0.010101	0	0.010101	0	0	0	0.010101	0	0	0.010101	0	0	0.010101	0	0	0.131313
0.0111111	0.0111111	0	0	0.0111111	0	0.766667	0	0	0	0.0111111	0.0111111	0.0111111	0	0	0	0	0	0.0111111	0.0111111	0	0.0111111	0.0111111	0	0	0	0	0	0	0	0	0	0.0111111	0	0.0111111	0.1
0.00555556	0.0111111	0.00555556	0	0.0777778	0.0166667	0.00555556	0.672222	0.00555556	0.00555556	0.0111111	0.00555556	0	0.00555556	0	0.00555556	0.00555556	0	0	0	0	0	0	0	0	0.00555556	0	0	0	0	0	0	0	0	0	0.155556
0.00888889	0	0.00444444	0	0	0.00888889	0	0	0.693333	0.00888889	0	0.00444444	0	0	0.00444444	0.00444444	0	0	0.00444444	0.00444444	0	0.00444444	0.00444444	0	0.00444444	0.00444444	0.00888889	0.00444444	0.00444444	0.00444444	0.00444444	0.00444444	0.00444444	0.00444444	0.00444444	0.191111
0.0042735	0.0128205	0.0213675	0.0042735	0.0128205	0	0.0128205	0.0042735	0.0213675	0.790598	0.0042735	0.00854701	0	0.0042735	0	0	0.0042735	0	0	0	0	0.0042735	0	0.0042735	0	0.0042735	0	0	0	0.0042735	0	0.0042735	0	0	0.0042735	0.0683761
0	0	0	0	0	0	0	0	0	0	0.666667	0	0	0	0.111111	0	0	0	0	0.111111	0	0	0	0	0	0	0	0	0	0	0	0	0	0	0.111111	0
0	0	0.010101	0.010101	0.010101	0.010101	0.030303	0.010101	0.010101	0.010101	0.010101	0.636364	0	0.010101	0	0	0	0	0	0	0	0	0	0	0	0	0	0.010101	0	0	0.010101	0	0	0	0	0.222222
0.0123457	0	0.0123457	0.0123457	0	0	0	0	0.0123457	0.0123457	0.0123457	0	0.802469	0	0.0123457	0	0.0123457	0.0123457	0	0	0	0	0	0	0	0.0123457	0	0	0	0	0	0	0	0	0	0.0740741
0	0	0	0	0	0	0	0	0	0.00462963	0.00462963	0	0	0.851852	0	0	0.00462963	0.00462963	0	0.00462963	0	0	0	0.00462963	0	0	0	0	0	0.00462963	0.00462963	0.00462963	0	0.00462963	0	0.101852
0.0026455	0.0132275	0	0.010582	0.0026455	0.0026455	0.0026455	0.0026455	0	0.0026455	0.0026455	0.0026455	0	0.00529101	0.653439	0.0026455	0.00529101	0.00793651	0	0.0026455	0.0026455	0.0026455	0.0026455	0.0026455	0.0026455	0	0.0026455	0.0026455	0.0026455	0.0026455	0.0026455	0.0026455	0.0026455	0.0026455	0.0026455	0.240741
0.00617284	0.0154321	0.00617284	0.00925926	0.00308642	0	0.00308642	0.00308642	0.00308642	0.00308642	0.00308642	0	0	0.00308642	0.0493827	0.709877	0.0123457	0.00925926	0.00617284	0	0	0.00617284	0.00308642	0.00617284	0.00308642	0	0	0.00308642	0.00617284	0.00617284	0.00925926	0.00617284	0.00308642	0	0.00308642	0.0987654
0	0	0.00241546	0.00241546	0.00241546	0.00241546	0	0	0.00241546	0.00483092	0	0	0	0.00241546	0.00483092	0.00483092	0.652174	0.0531401	0.00724638	0.00241546	0.00241546	0.00483092	0.00483092	0.00724638	0.00724638	0.00966184	0.0144928	0.00724638	0.00241546	0.00724638	0	0.00724638	0.00241546	0.00724638	0.0120773	0.15942
0	0.00161031	0.00161031	0.00161031	0.00161031	0.00161031	0.00644122	0.00161031	0.00161031	0	0	0.00161031	0.00161031	0.00161031	0.020934	0.00161031	0.0193237	0.816425	0	0.00161031	0.00322061	0.00161031	0.00161031	0.00161031	0.00322061	0.00161031	0.00161031	0	0.00161031	0.00322061	0.00322061	0.00322061	0.00161031	0.00322061	0	0.0869565
0	0	0	0	0	0	0	0	0	0	0.0123457	0	0	0	0.0123457	0	0	0	0.82716	0.0123457	0	0.0123457	0	0.0123457	0.0123457	0	0	0.0123457	0	0	0	0.0123457	0	0.0123457	0	0.0617284
0	0.00555556	0.0111111	0.0111111	0	0.00555556	0.00555556	0.00555556	0.00555556	0	0.00555556	0.00555556	0.0111111	0.00555556	0	0.0111111	0.00555556	0.00555556	0	0.611111	0.0166667	0	0.0166667	0.0166667	0	0.0166667	0.00555556	0.00555556	0.0166667	0.0222222	0	0.0111111	0.00555556	0.00555556	0.0277778	0.122222
0	0	0.00555556	0	0	0	0	0	0.00555556	0	0	0	0	0.00555556	0	0	0.00555556	0.00555556	0	0.0111111	0.816667	0.00555556	0	0.0111111	0.00555556	0	0.00555556	0.00555556	0	0.00555556	0.00555556	0.00555556	0.00555556	0.00555556	0.00555556	0.0777778
0	0	0	0	0	0	0	0	0.0123457	0	0	0	0	0	0	0	0	0	0	0.0123457	0	0.802469	0	0	0.0123457	0	0	0	0	0	0	0.0123457	0	0	0.0123457	0.135802
0.00308642	0.00308642	0.00617284	0.00308642	0.00308642	0.0123457	0	0.0123457	0	0.00617284	0	0.0123457	0.0123457	0	0.00617284	0.00617284	0.0123457	0.00617284	0.0123457	0	0.00308642	0.00308642	0.654321	0.0123457	0.00617284	0.0123457	0.0123457	0.00617284	0.00925926	0.00925926	0.00925926	0.00308642	0.0123457	0.00617284	0.00925926	0.114198
0.0070922	0.00236407	0.00236407	0.00236407	0.0070922	0.00236407	0	0.00236407	0.00236407	0.00472813	0.00236407	0.00236407	0.00236407	0.0070922	0.0070922	0.00945626	0.00236407	0.00472813	0.00236407	0.00945626	0.0070922	0	0	0.799054	0.00472813	0.00236407	0.0070922	0.00472813	0.00236407	0.00945626	0.00472813	0	0.0118203	0.00472813	0.0070922	0.0520095
0.00358423	0	0.00358423	0	0.00358423	0	0.00358423	0	0	0.00358423	0.00358423	0.00358423	0.00358423	0.00358423	0.00716846	0.00358423	0.00716846	0.00716846	0	0.00716846	0.0107527	0.00358423	0.00358423	0.00358423	0.727599	0.00358423	0.00358423	0.00358423	0.00358423	0.0107527	0	0.0107527	0.00358423	0	0.00716846	0.139785
0	0	0	0	0	0	0.0222222	0	0	0	0	0	0	0	0	0	0.0222222	0	0	0	0	0.0222222	0	0.0222222	0	0.711111	0.0222222	0	0	0	0.0222222	0	0	0	0	0.155556
0	0.00396825	0	0	0	0	0	0	0	0.00396825	0	0.00396825	0.00396825	0	0.00396825	0	0.00396825	0.00396825	0	0.00396825	0	0.00396825	0	0	0	0.00396825	0.853175	0	0	0	0	0	0.00396825	0	0	0.103175
0.0185185	0	0	0.0185185	0.0185185	0	0	0	0	0	0	0	0	0.0185185	0	0	0	0	0.0185185	0.0185185	0	0	0	0	0	0.0185185	0	0.777778	0.0185185	0	0.0185185	0.0185185	0	0	0	0.037037
0	0	0	0.0277778	0	0.0277778	0	0.0277778	0	0	0.0277778	0	0	0	0.0277778	0.0277778	0	0	0	0	0	0	0	0	0	0	0	0	0.583333	0	0.0277778	0	0	0	0	0.222222
0	0	0	0	0	0	0.00444444	0.00444444	0	0.00444444	0	0	0.00444444	0	0.0133333	0.00444444	0	0.00444444	0.00444444	0.00444444	0.00444444	0.00444444	0.00444444	0.00444444	0	0.00444444	0	0.00444444	0	0.831111	0.00444444	0.00444444	0	0.00444444	0	0.08
0.00806452	0.00806452	0.00806452	0.00806452	0	0.016129	0.00806452	0.00806452	0.00806452	0	0	0	0	0.00806452	0.00806452	0	0	0.016129	0	0	0.00806452	0	0.00806452	0.00806452	0	0.00806452	0	0.00806452	0.00806452	0.00806452	0.701613	0.00806452	0.00806452	0.016129	0.00806452	0.0967742
0.00194932	0	0.00194932	0.00194932	0.00194932	0	0	0.00194932	0	0	0.00194932	0.00194932	0.00389864	0.00389864	0.00584795	0.00389864	0.00584795	0.00194932	0.00389864	0.00779727	0.00389864	0.00779727	0	0.00389864	0.00389864	0.00584795	0.00974659	0.00194932	0.00584795	0.00584795	0.00779727	0.810916	0.00779727	0.00974659	0.0116959	0.0526316
0.00194553	0.00972763	0.0077821	0.00194553	0.0116732	0.00972763	0.00583658	0.00194553	0.0116732	0.00583658	0.0077821	0.00389105	0.00194553	0	0.00194553	0.00583658	0.00194553	0	0.00389105	0.00389105	0.00389105	0	0.00583658	0	0.00194553	0.00194553	0.00389105	0.00194553	0.00194553	0.0077821	0.00194553	0.0116732	0.7607	0.0077821	0.00583658	0.0836576
0	0.00925926	0	0.00308642	0.00308642	0.00308642	0.00617284	0.00308642	0.00308642	0.00617284	0.00617284	0.00308642	0.00617284	0	0.00308642	0.00308642	0.00617284	0.00925926	0.00308642	0.00925926	0.00617284	0.00308642	0.00308642	0.00617284	0.00925926	0.00308642	0.00925926	0.00308642	0.00308642	0.00617284	0.00617284	0.0154321	0.0185185	0.54321	0.0154321	0.262346
0	0	0.00694444	0	0	0	0	0.00694444	0	0	0.00694444	0	0.00694444	0	0.00694444	0	0	0	0.00694444	0.00694444	0	0	0.00694444	0	0	0	0	0.00694444	0	0.00694444	0	0.00694444	0.00694444	0.0138889	0.805556	0.0972222
0.0637066	0.106178	0.0444015	0.027027	0.0135135	0.00772201	0.00965251	0.015444	0.0289575	0.027027	0	0.019305	0.011583	0.019305	0.034749	0.0405405	0.046332	0.0714286	0.00965251	0.027027	0.019305	0.015444	0.0289575	0.03861	0.034749	0.0019305	0.0405405	0.00965251	0.00579151	0.034749	0.00772201	0.0444015	0.0579151	0.027027	0.00965251	0
panel D
0.938562	0.0143791	0.00130719	0.00392157	0.00130719	0	0.00130719	0.00130719	0.00522876	0.00261438	0.00392157	0.00130719	0	0	0	0.00130719	0	0	0	0	0.00130719	0	0	0.00130719	0	0	0.00130719	0	0	0	0	0	0	0	0	0.0196078
0.0138889	0.900174	0.00347222	0.00173611	0.0130208	0.00173611	0.00434028	0.00347222	0.00260417	0.0078125	0.00694444	0.00173611	0	0	0.00173611	0.00260417	0	0.000868056	0	0	0	0.000868056	0	0	0.000868056	0.000868056	0	0	0.000868056	0	0.000868056	0	0.000868056	0.000868056	0	0.0277778
0.0175439	0.0467836	0.701754	0.0116959	0.0409357	0.0116959	0.00584795	0.00584795	0.0233918	0.0292398	0.0350877	0.00584795	0	0.00584795	0	0	0	0	0	0	0	0	0	0	0	0	0	0	0	0	0	0	0	0	0	0.0584795
0.00854701	0	0.00854701	0.820513	0.017094	0.00854701	0	0	0	0	0.00854701	0	0	0	0	0.034188	0	0	0	0	0	0	0	0.00854701	0	0	0	0	0	0	0	0	0.00854701	0	0	0.0769231
0	0	0.00347222	0	0.972222	0.0138889	0	0	0.00347222	0	0	0	0	0	0	0	0	0	0	0	0	0	0	0	0	0	0	0	0	0	0	0	0	0	0	0.00694444
0	0.010101	0.020202	0	0	0.919192	0	0	0	0	0	0	0	0	0	0	0	0	0	0	0	0	0.010101	0	0	0	0	0	0	0	0	0	0	0	0	0.040404
0	0.0222222	0	0	0	0	0.933333	0	0	0	0	0.0111111	0	0	0	0	0	0	0	0	0	0	0	0	0	0	0	0	0	0	0	0	0	0	0	0.0333333
0.00555556	0.00555556	0	0	0.0555556	0.00555556	0	0.905556	0	0	0.00555556	0.00555556	0	0	0	0	0	0	0	0	0	0	0	0	0	0	0	0	0	0	0	0	0	0	0	0.0111111
0.0133333	0	0.00444444	0	0	0.00888889	0	0	0.915556	0.00888889	0	0.00444444	0	0	0	0	0	0	0	0.00444444	0	0	0	0	0	0	0.00444444	0	0	0	0	0	0	0	0	0.0355556
0	0.0042735	0.0128205	0	0.0042735	0	0.0042735	0	0.00854701	0.918803	0	0.0042735	0	0	0	0	0	0	0	0	0	0	0	0	0	0	0	0	0	0	0	0.0042735	0	0	0	0.0384615
0	0	0	0	0	0	0	0	0	0	0.888889	0	0	0	0	0	0	0	0	0	0	0	0	0	0	0	0	0	0	0	0	0	0	0	0	0.111111
0	0	0.010101	0.010101	0	0	0.020202	0.010101	0	0	0	0.929293	0	0	0	0	0	0	0	0	0	0	0	0	0	0	0	0	0	0	0	0	0	0	0	0.020202
0	0	0	0	0	0	0	0	0	0	0	0	0.888889	0	0	0	0	0	0	0	0	0	0	0	0	0	0	0	0	0	0	0	0	0	0	0.111111
0	0	0	0	0	0	0	0	0	0	0	0	0	0.898148	0	0	0.00925926	0.00462963	0	0.00462963	0	0	0	0.00925926	0	0	0	0	0	0.00462963	0	0.00462963	0	0.00462963	0	0.0601852
0	0.00793651	0	0.00529101	0	0	0	0	0	0	0	0	0	0.0026455	0.970899	0	0	0.0026455	0	0	0	0	0	0	0	0	0	0	0	0	0	0	0	0	0	0.010582
0	0.00617284	0	0.00308642	0	0	0	0	0	0	0	0	0	0	0.0246914	0.916667	0.00617284	0.00308642	0	0	0	0	0	0.00308642	0	0	0	0	0	0	0.00308642	0.00308642	0	0	0	0.0308642
0	0	0	0	0	0	0	0	0	0.00241546	0	0	0	0	0	0	0.929952	0.0144928	0	0	0	0	0	0	0	0	0.00241546	0	0	0	0	0	0	0	0.00241546	0.0483092
0	0	0	0	0	0	0.00322061	0	0	0	0	0	0	0	0.0128824	0	0.0112721	0.94847	0	0	0.00161031	0	0	0	0.00161031	0	0	0	0	0.00161031	0	0	0	0	0	0.0193237
0	0	0	0	0	0	0	0	0	0	0	0	0	0	0	0	0	0	0.950617	0	0	0	0	0	0	0	0	0	0	0	0	0	0	0	0	0.0493827
0	0	0	0	0	0	0	0	0	0	0	0	0.00555556	0	0	0	0	0	0	0.905556	0.00555556	0	0.00555556	0.00555556	0	0.00555556	0	0	0.00555556	0.00555556	0	0.00555556	0	0	0.0111111	0.0388889
0	0	0.00555556	0	0	0	0	0	0.00555556	0	0	0	0	0	0	0	0.00555556	0.0111111	0	0.0111111	0.861111	0.00555556	0	0.0111111	0.00555556	0	0.0111111	0	0	0.00555556	0.00555556	0	0.00555556	0.00555556	0	0.0444444
0	0	0	0	0	0	0	0	0	0	0	0	0	0	0	0	0	0	0	0.0123457	0	0.876543	0	0	0.037037	0	0	0.0123457	0	0	0	0.0123457	0	0	0.0123457	0.037037
0	0	0	0	0	0.00308642	0	0.00308642	0	0	0	0.00308642	0	0	0	0	0	0	0	0	0	0	0.966049	0	0	0	0	0	0	0	0	0	0	0	0	0.0246914
0.00236407	0	0	0	0.00236407	0	0	0	0	0	0	0	0	0.00236407	0.00236407	0.00472813	0	0.00236407	0	0.00472813	0.00236407	0	0	0.93617	0	0	0.00236407	0	0	0.00236407	0.00236407	0	0.00472813	0.00236407	0.00236407	0.0236407
0	0	0	0	0	0	0	0	0	0	0	0	0	0	0.00358423	0	0.00358423	0	0	0.00358423	0.00358423	0	0	0	0.939068	0	0	0	0	0.00358423	0	0.00358423	0	0	0.00358423	0.0358423
0	0	0	0	0	0	0	0	0	0	0	0	0	0	0	0	0	0	0	0	0	0.0444444	0	0.0222222	0	0.888889	0.0222222	0	0	0	0	0	0	0	0	0.0222222
0	0	0	0	0	0	0	0	0	0	0	0	0	0	0.00396825	0	0	0.00396825	0	0.00396825	0	0.00396825	0	0	0	0.00793651	0.956349	0	0	0	0	0	0.00396825	0	0	0.015873
0	0	0	0	0	0	0	0	0	0	0	0	0	0	0	0	0	0	0	0.0185185	0	0	0	0	0	0.0185185	0	0.925926	0	0	0	0	0	0	0	0.037037
0	0	0	0	0	0	0	0	0	0	0	0	0	0	0.0277778	0	0	0	0	0	0	0	0	0	0	0	0	0	0.833333	0	0.0277778	0	0	0	0	0.111111
0	0	0	0	0	0	0.00444444	0	0	0.00444444	0	0	0.00444444	0	0.0133333	0.00444444	0	0	0.00444444	0.00444444	0	0	0.00444444	0	0	0.00444444	0	0	0	0.902222	0	0.00444444	0	0.00444444	0	0.04
0	0	0	0	0	0.00806452	0	0	0	0	0	0	0	0	0	0	0	0.00806452	0	0	0	0	0.00806452	0	0	0	0	0	0	0	0.862903	0.00806452	0.00806452	0.00806452	0.00806452	0.0806452
0.00194932	0	0	0	0.00194932	0	0	0.00194932	0	0	0	0	0.00194932	0.00194932	0.00389864	0.00194932	0.00194932	0	0.00194932	0.00389864	0.00194932	0.00389864	0	0.00194932	0.00194932	0.00389864	0.00584795	0	0.00194932	0.00389864	0.00389864	0.904483	0.00389864	0.00584795	0.00779727	0.0253411
0	0	0	0	0	0	0	0	0	0	0	0	0	0	0	0.00194553	0	0	0	0	0	0	0.00194553	0	0	0	0	0	0	0.00194553	0	0.00389105	0.976654	0.00194553	0.00194553	0.00972763
0	0.00617284	0	0.00308642	0	0	0.00308642	0.00308642	0	0.00617284	0.00308642	0	0.00308642	0	0.00308642	0	0.00617284	0.00925926	0.00308642	0.00925926	0.00617284	0.00308642	0.00308642	0.00617284	0.00925926	0.00308642	0.00925926	0.00308642	0	0.00308642	0.00617284	0.0185185	0.0216049	0.799383	0.0154321	0.0339506
0	0	0.00694444	0	0	0	0	0	0	0	0	0	0	0	0.0138889	0	0	0	0.00694444	0	0	0	0.00694444	0	0	0	0	0.00694444	0	0.00694444	0	0.00694444	0.00694444	0.0138889	0.902778	0.0208333
0.0656371	0.111969	0.042471	0.027027	0.011583	0.00772201	0.00772201	0.015444	0.030888	0.027027	0	0.019305	0.011583	0.019305	0.034749	0.03861	0.046332	0.0733591	0.00772201	0.027027	0.019305	0.015444	0.030888	0.03861	0.034749	0	0.042471	0.00772201	0.003861	0.034749	0.00772201	0.046332	0.0579151	0.027027	0.00772201	0
panel E
Model	PCC
Final	1.25
Final	1.32911
Final	2.38095
Final	0.625
Final	2.25
Final	0.777778
Final	1
Final	4.25
Final	0.944444
Final	0.947368
Final	0.5
Final	1.75
Final	2
Final	2.69231
Final	1.4
Final	2.61538
Final	2.28571
Final	2.875
Final	2
Final	3.42857
Final	3.1
Final	4.33333
Final	1.58333
Final	2.92308
Final	2.7
Final	6
Final	3.75
Final	3
Final	2.5
Final	2.63636
Final	2.36364
Final	3.64706
Final	3.5
Final	3.57895
Final	4
Final	1.72632
MLP	1.44444
MLP	0.981221
MLP	0.62439
MLP	0.56383
MLP	0.541063
MLP	0.606742
MLP	0.531646
MLP	0.916667
MLP	0.485597
MLP	1
MLP	0.125
MLP	0.709677
MLP	1.23256
MLP	2.09346
MLP	1.89427
MLP	2.14876
MLP	2.72436
MLP	2.33193
MLP	2.78261
MLP	2.38462
MLP	2.62295
MLP	2.06977
MLP	2.225
MLP	2.35938
MLP	2.32479
MLP	2.42105
MLP	2.00758
MLP	1.84211
MLP	1.54545
MLP	2.39535
MLP	1.97917
MLP	3.36364
MLP	1.47699
MLP	2.19048
MLP	2.28814
MLP	1.75532
LSTM	1.44681
LSTM	0.980892
LSTM	0.632353
LSTM	0.564103
LSTM	0.537037
LSTM	0.645161
LSTM	0.56
LSTM	0.916667
LSTM	0.490385
LSTM	1.025
LSTM	0
LSTM	0.702128
LSTM	1.33333
LSTM	2.16667
LSTM	1.89815
LSTM	2.16
LSTM	2.78082
LSTM	2.36364
LSTM	3
LSTM	2.45455
LSTM	2.8125
LSTM	2.16667
LSTM	2.26316
LSTM	2.39474
LSTM	2.34783
LSTM	2.375
LSTM	2.06897
LSTM	2.2
LSTM	1.58333
LSTM	2.52381
LSTM	1.90476
LSTM	3.44118
LSTM	1.4881
LSTM	2.18
LSTM	2.29412
LSTM	1.75532
word	1.26471
word	1.32468
word	2.38095
word	0.625
word	2
word	0.777778
word	1
word	4.25
word	0.944444
word	0.947368
word	0.5
word	1.75
word	2
word	2.69231
word	1.11111
word	2.61538
word	2.28571
word	3
word	2
word	3.42857
word	3.1
word	4.33333
word	1.45455
word	2.91667
word	2.7
word	6
word	3.75
word	3
word	2.5
word	2.63636
word	2.36364
word	3.6875
word	3.4
word	3.57895
word	4
word	1.72632

## Sheet: figS4
melspec r2
25%training data									50%training data									75%training data
Participant1	Participant2	Participant3	Participant4	Participant5	Participant6	Participant7	Participant8	Participant9	Participant1	Participant2	Participant3	Participant4	Participant5	Participant6	Participant7	Participant8	Participant9	Participant1	Participant2	Participant3	Participant4	Participant5	Participant6	Participant7	Participant8	Participant9
0.5705	0.632981	0.639708	0.659875	0.622653	0.601287	0.662716	0.614705	0.573375	0.5701	0.634522	0.64104	0.66058	0.624514	0.603813	0.663333	0.616813	0.576767	0.7913	0.688343	0.696149	0.719548	0.676359	0.651568	0.722844	0.667137	0.619182
0.7299	0.706171	0.594258	0.615181	0.719058	0.624512	0.697676	0.609809	0.606366	0.7216	0.705438	0.597002	0.617275	0.717924	0.626316	0.697207	0.612069	0.608734	0.7715	0.773265	0.643412	0.66769	0.788218	0.678516	0.763409	0.661456	0.657462
0.7276	0.183754	0.646174	0.718742	0.616572	0.627399	0.615982	0.659376	0.696931	0.7317	0.710925	0.275865	0.717619	0.618623	0.629113	0.618051	0.660097	0.696485	0.7087	0.779836	0.70365	0.787852	0.669303	0.681866	0.668619	0.718969	0.762544
0.6926	0.678579	0.657636	0.63684	0.621498	0.701726	0.645976	0.70625	0.661397	0.7001	0.678704	0.658411	0.638261	0.623396	0.701131	0.647113	0.705515	0.662055	0.6715	0.741251	0.71695	0.692821	0.675019	0.768108	0.703421	0.773358	0.721314
0.6441	0.609139	0.713105	0.695617	0.17275	0.677448	0.687712	0.613371	0.637213	0.6555	0.61142	0.712156	0.695212	0.666624	0.677607	0.687553	0.615521	0.638623	0.6178	0.660679	0.781311	0.76102	0.726785	0.739938	0.751848	0.66559	0.693253
0.637	0.633764	0.619281	0.633403	0.616766	0.727375	0.583026	0.662797	0.631658	0.6504	0.63528	0.621247	0.634931	0.618811	0.197254	0.586119	0.663412	0.63324	0.124857	0.689251	0.672447	0.688833	0.669529	0.797868	0.63038	0.722939	0.312427
0.6439	0.593446	0.66579	0.66314	0.690208	0.65713	0.585357	0.345724	0.736868	0.5542	0.596215	0.666312	0.663744	0.689971	0.65792	0.588377	0.649053	0.735182	0.7213	0.496521	0.726412	0.723337	0.754744	0.716363	0.633084	0.705744	0.808884
0.7061	0.708783	0.675268	0.669084	0.642914	0.54105	0.619343	0.605938	0.610065	0.6837	0.707969	0.675495	0.669504	0.644146	0.545447	0.621308	0.608319	0.612318	0.692	0.776296	0.737409	0.730234	0.699868	0.581675	0.672519	0.656964	0.661754
0.6649	0.670206	0.54991	0.64429	0.732397	0.287345	0.575388	0.616157	0.602206	0.6738	0.12757	0.554032	0.645479	0.730849	0.5724	0.578718	0.618221	0.604703	0.7403	0.731536	0.591956	0.194527	0.803696	0.780416	0.621518	0.245379	0.652635
0.6024	0.700336	0.682047	0.772753	0.699599	0.714312	0.739839	0.642599	0.65942	0.59	0.699784	0.682063	0.769951	0.69907	0.713327	0.73806	0.643841	0.660139	0.681	0.766495	0.745274	0.85052	0.765639	0.782712	0.812331	0.699502	0.71902
0.5845	0.630208	0.611096	0.702691	0.623887	0.667861	0.698975	0.704206	0.743537	0.5941	0.631835	0.613317	0.702066	0.62571	0.668319	0.698466	0.703534	0.741643	0.623	0.685125	0.66295	0.38754	0.677791	0.728815	0.764916	0.770986	0.816621
0.6656	0.757056	0.644017	0.723305	0.702916	0.692362	0.671884	0.641808	0.615269	0.6749	0.754742	0.645215	0.72204	0.702284	0.692058	0.672216	0.643074	0.61736	0.6558	0.832308	0.701148	0.793147	0.769488	0.757243	0.733482	0.698585	0.667791
0.6344	0.144573	0.790087	0.770239	0.71192	0.275873	0.717543	0.664217	0.673571	0.6385	0.753356	0.786747	0.767516	0.711008	0.661336	0.716457	0.242786	0.372817	0.7253	0.830648	0.870634	0.847604	0.779936	0.720453	0.78646	0.724586	0.73544
0.6961	0.654561	0.741157	0.274578	0.709938	0.665595	0.693745	0.378141	0.69681	0.7024	0.655432	0.435796	0.681243	0.709088	0.157577	0.693398	0.689837	0.696368	0.7518	0.713383	0.81386	0.744292	0.777636	0.726185	0.758848	0.754583	0.762404
0.577	0.603176	0.704076	0.715445	0.543169	0.655023	0.615492	0.651825	0.631469	0.5723	0.605643	0.703408	0.714423	0.5475	0.655879	0.381424	0.65278	0.633056	0.7063	0.65376	0.770835	0.784026	0.584134	0.713918	0.66805	0.710208	0.686588
0.7185	0.625552	0.6527	0.589573	0.63426	0.590106	0.76088	0.715597	0.712509	0.7095	0.627324	0.653628	0.592462	0.635761	0.592979	0.758448	0.714571	0.711579	0.7739	0.679723	0.711222	0.637976	0.689827	0.638595	0.836745	0.784202	0.78062
0.7404	0.661748	0.616344	0.611101	0.557409	0.620039	0.666086	0.713802	0.640518	0.7275	0.662395	0.618402	0.613322	0.561297	0.621982	0.666599	0.712832	0.641825	0.8374	0.721721	0.669039	0.662956	0.600656	0.673326	0.726755	0.78212	0.697088
0.6963	0.657909	0.681754	0.522026	0.748401	0.304274	0.687411	0.611603	0.705443	0.7007	0.658675	0.68178	0.527014	0.746356	0.54377	0.68726	0.613808	0.704733	0.7244	0.717267	0.744935	0.559601	0.822265	0.425786	0.751498	0.663538	0.772421
0.6336	0.626588	0.649303	0.61921	0.679689	0.682247	0.714374	0.660453	0.68003	0.6353	0.628327	0.650337	0.621179	0.679779	0.682257	0.713386	0.66114	0.680109	0.6503	0.680925	0.707281	0.672365	0.742538	0.745507	0.782783	0.720218	0.742934
0.6548	0.676942	0.592549	0.637523	0.647818	0.629056	0.61269	0.642706	0.669251	0.657	0.677117	0.595346	0.638923	0.648898	0.630719	0.614861	0.643944	0.669665	0.7676	0.739351	0.64143	0.693614	0.705558	0.683789	0.664799	0.699627	0.730427
0.582078	0.658171	0.712007	0.640692	0.562943	0.624317	0.625211	0.346282	0.673667	0.649479	0.633122	0.679092	0.662243	0.556803	0.658524	0.649149	0.647142	0.692312	0.722415	0.680936	0.751809	0.796154	0.810763	0.683159	0.748791	0.758934	0.654715
0.632966	0.636353	0.607661	0.772852	0.640528	0.30507	0.615567	0.609071	0.598418	0.698309	0.623541	0.613887	0.708216	0.73532	0.688737	0.675617	0.651477	0.748528	0.125004	0.694385	0.711294	0.559829	0.698506	0.717265	0.675817	0.661964	0.66352
0.651399	0.628143	0.675225	0.695222	0.651824	0.539644	0.669449	0.705387	0.569378	0.712471	0.755718	0.639601	0.62343	0.637789	0.7066	0.617347	0.619431	0.631972	0.746626	0.719026	0.671358	0.687733	0.668709	0.741494	0.723687	0.709155	0.686933
0.689321	0.758964	0.613582	0.624715	0.616291	0.72475	0.753778	0.661449	0.666778	0.705145	0.637039	0.655882	0.772431	0.618221	0.663815	0.717963	0.62189	0.609006	0.620008	0.742826	0.700893	0.786375	0.594784	0.7922	0.698137	0.666719	0.811579
0.639368	0.623386	0.658489	0.670309	0.71316	0.661016	0.682153	0.655662	0.643493	0.683712	0.704869	0.786467	0.61	0.626128	0.55086	0.612344	0.241004	0.68444	0.685528	0.770977	0.812571	0.846421	0.775794	0.675711	0.759062	0.770135	0.619329
0.697299	0.69769	0.640347	0.519173	0.689899	0.665213	0.710964	0.611425	0.695399	0.595838	0.630931	0.681717	0.640215	0.702658	0.607188	0.73356	0.699055	0.371776	0.768872	0.836233	0.874181	0.669817	0.729794	0.718351	0.810503	0.247099	0.313979
0.746896	0.67892	0.746675	0.662301	0.624541	0.628747	0.66793	0.65753	0.66373	0.673937	0.676058	0.700784	0.657158	0.691761	0.688935	0.69105	0.607115	0.617379	0.72678	0.740241	0.641189	0.668578	0.757675	0.726337	0.729764	0.71013	0.717867
0.667172	0.707843	0.686663	0.612974	0.695056	0.275663	0.746824	0.708952	0.711849	0.718242	0.680008	0.594894	0.6434	0.668578	0.630562	0.587793	0.613241	0.663409	0.722103	0.768544	0.667201	0.777457	0.673182	0.684521	0.730428	0.789131	0.812725
0.692829	0.588733	0.647203	0.706189	0.733675	0.286153	0.678523	0.604215	0.645564	0.634956	0.705453	0.62633	0.698097	0.7135	0.624432	0.585051	0.66898	0.612774	0.696837	0.685822	0.591214	0.637563	0.687434	0.758686	0.83829	0.67111	0.765247
0.63898	0.658256	0.598167	0.639714	0.698063	0.67002	0.696833	0.650832	0.741894	0.66923	0.759734	0.553482	0.680964	0.627158	0.543383	0.691307	0.709892	0.631904	0.796154	0.659779	0.708716	0.85441	0.763228	0.678599	0.764498	0.660705	0.737084
0.644497	0.614886	0.688251	0.608287	0.62082	0.602135	0.580604	0.637251	0.671704	0.722537	0.657396	0.715698	0.640128	0.544178	0.680895	0.62728	0.704168	0.729251	0.701909	0.652853	0.665842	0.731898	0.693452	0.732844	0.788283	0.719147	0.69441
0.576338	0.184485	0.650311	0.721624	0.634737	0.619147	0.611642	0.376733	0.61123	0.647387	0.655397	0.67777	0.63501	0.745032	0.574385	0.694369	0.664865	0.693217	0.656524	0.686035	0.718278	0.668267	0.792306	0.742679	0.752764	0.7676	0.691067
0.667447	0.656649	0.612125	0.591888	0.172618	0.698446	0.578186	0.648331	0.693153	0.706012	0.616771	0.644938	0.721289	0.615353	0.158755	0.584312	0.640854	0.580135	0.668193	0.766579	0.723146	0.757257	0.582088	0.779886	0.779337	0.72071	0.666283
0.709764	0.676219	0.58835	0.632363	0.684231	0.586222	0.720672	0.668926	0.609264	0.55541	0.630278	0.609723	0.671081	0.645941	0.704752	0.760122	0.708787	0.647433	0.775798	0.494931	0.738321	0.71552	0.777975	0.585539	0.628676	0.65114	0.735894
0.601188	0.627677	0.649412	0.273183	0.726193	0.693197	0.641957	0.610691	0.600607	0.738533	0.599231	0.641796	0.696522	0.618378	0.197717	0.684087	0.643193	0.639494	0.659876	0.7748	0.711962	0.740359	0.829696	0.782926	0.768481	0.718517	0.774484
0.719469	0.604026	0.663744	0.668905	0.628534	0.710056	0.692829	0.613812	0.628547	0.64199	0.128363	0.437205	0.62324	0.649664	0.665309	0.666838	0.68334	0.610001	0.837366	0.72782	0.64315	0.697118	0.768227	0.769445	0.615796	0.705329	0.763539
0.567141	0.663991	0.636297	0.718451	0.619605	0.677345	0.580037	0.710874	0.68656	0.594966	0.649512	0.664195	0.589709	0.709374	0.591038	0.383048	0.615961	0.663343	0.758051	0.72501	0.706601	0.389109	0.742139	0.707051	0.672653	0.727227	0.77852
0.642651	0.143893	0.70768	0.649219	0.74391	0.685377	0.699846	0.646979	0.70984	0.656346	0.709713	0.273329	0.766347	0.710498	0.626158	0.68396	0.61074	0.71161	0.703044	0.682223	0.767496	0.196	0.679816	0.428655	0.666799	0.704816	0.734285
0.727786	0.622711	0.785756	0.777069	0.703354	0.625681	0.691578	0.610999	0.744604	0.567672	0.608374	0.591341	0.721915	0.680099	0.659827	0.707888	0.656131	0.715313	0.762009	0.713499	0.78575	0.69174	0.677255	0.646538	0.63454	0.699449	0.720769
0.726634	0.705455	0.549343	0.716337	0.539787	0.65846	0.620453	0.719711	0.633069	0.575189	0.694732	0.665487	0.53157	0.696788	0.621059	0.663992	0.644229	0.665454	0.622227	0.826309	0.732548	0.725667	0.665691	0.642942	0.671062	0.780872	0.655022
0.697345	0.663634	0.611274	0.655068	0.621369	0.590753	0.698282	0.619261	0.627553	0.722367	0.634113	0.64977	0.77696	0.630023	0.598653	0.38307	0.612334	0.736994	0.713294	0.735033	0.677975	0.856144	0.674441	0.6775	0.677357	0.70306	0.713929
0.667085	0.598869	0.670962	0.718908	0.558594	0.661328	0.664643	0.648777	0.683623	0.587697	0.758758	0.683684	0.696988	0.713305	0.657135	0.666447	0.706297	0.693976	0.720318	0.678867	0.771612	0.841275	0.679149	0.685673	0.759317	0.669553	0.690845
0.73491	0.695942	0.677604	0.763175	0.751659	0.696994	0.586777	0.601296	0.601716	0.575503	0.128518	0.661034	0.621215	0.713831	0.662745	0.710411	0.661203	0.638967	0.784964	0.721593	0.670328	0.744489	0.766235	0.719602	0.660386	0.662668	0.646484
0.601882	0.682487	0.717669	0.660652	0.619395	0.624736	0.704167	0.662908	0.641877	0.554058	0.713591	0.616112	0.656471	0.630886	0.674962	0.693815	0.644106	0.603909	0.769435	0.829761	0.697728	0.726461	0.679012	0.769979	0.615635	0.671545	0.765511
0.73317	0.707142	0.639911	0.617003	0.617791	0.677658	0.676297	0.717451	0.629752	0.594684	0.609804	0.679613	0.648726	0.67815	0.667071	0.590331	0.614196	0.739422	0.612905	0.689069	0.871968	0.689331	0.701764	0.755949	0.700923	0.701013	0.816305
0.636918	0.621718	0.587776	0.650067	0.630391	0.659984	0.718852	0.698713	0.605177	0.574412	0.754518	0.593157	0.713623	0.629848	0.539431	0.760081	0.610911	0.716955	0.710525	0.683743	0.750867	0.7307	0.763362	0.800223	0.723642	0.704856	0.67085
0.707835	0.629148	0.646581	0.665168	0.611187	0.2886	0.651856	0.342501	0.664441	0.728647	0.676962	0.274438	0.620141	0.742286	0.630427	0.620308	0.615252	0.632315	0.661085	0.77111	0.695638	0.691979	0.744686	0.716209	0.791565	0.244908	0.660575
0.634388	0.184311	0.610306	0.589447	0.70571	0.619373	0.683054	0.659675	0.750305	0.66732	0.672803	0.436622	0.595909	0.736797	0.570024	0.707833	0.717102	0.635728	0.770998	0.737106	0.699723	0.69299	0.606424	0.422327	0.756423	0.655384	0.615152
0.646755	0.652361	0.797474	0.610425	0.547948	0.601409	0.618082	0.637841	0.678674	0.681667	0.633976	0.558112	0.76598	0.714321	0.615965	0.621965	0.6442	0.610335	0.668567	0.716869	0.77513	0.561513	0.720996	0.653358	0.74435	0.778895	0.760199
0.741093	0.144635	0.59887	0.640927	0.710224	0.728904	0.5781	0.621969	0.616619	0.732207	0.629528	0.649327	0.657706	0.619643	0.597538	0.643869	0.638391	0.693768	0.744384	0.659579	0.713388	0.726497	0.580488	0.726941	0.756898	0.713476	0.736538
0.668683	0.651656	0.697735	0.609244	0.694703	0.306605	0.619425	0.670064	0.719175	0.713017	0.694327	0.683008	0.523863	0.548166	0.678305	0.578825	0.655267	0.662094	0.650246	0.500566	0.714237	0.196226	0.795809	0.5814	0.812199	0.778996	0.661224
0.695553	0.626933	0.651513	0.699631	0.704977	0.662811	0.614908	0.665088	0.574913	0.706681	0.60951	0.696406	0.633082	0.612636	0.628616	0.691735	0.64963	0.581626	0.732386	0.711447	0.665311	0.668708	0.785213	0.74146	0.632654	0.723608	0.701741
0.698306	0.674208	0.652333	0.703264	0.691365	0.621892	0.685375	0.658132	0.700674	0.652938	0.659269	0.626771	0.636698	0.661649	0.624764	0.738205	0.614782	0.66726	0.684241	0.76161	0.591109	0.75463	0.754462	0.683113	0.720094	0.693806	0.69092
0.579667	0.598445	0.73701	0.765728	0.716359	0.621907	0.61358	0.379601	0.742741	0.652528	0.656483	0.598828	0.718455	0.645194	0.707782	0.684549	0.709757	0.71174	0.68938	0.786802	0.728661	0.636876	0.699428	0.635086	0.784615	0.749117	0.727855
0.661334	0.711459	0.676083	0.633579	0.645128	0.672618	0.734219	0.61408	0.665591	0.707022	0.657824	0.612082	0.680151	0.694481	0.692095	0.668135	0.692303	0.369632	0.624251	0.648541	0.644554	0.658724	0.78399	0.785349	0.734626	0.780155	0.720762
0.647032	0.682312	0.673362	0.27428	0.730889	0.273489	0.659849	0.713755	0.632132	0.708127	0.70424	0.645828	0.709735	0.560036	0.549717	0.692283	0.711859	0.604225	0.725364	0.737696	0.741023	0.67903	0.668194	0.740386	0.665929	0.718934	0.775108
0.577674	0.61269	0.660703	0.723181	0.644184	0.652991	0.703704	0.604492	0.710075	0.634759	0.704587	0.789491	0.643169	0.699729	0.65885	0.700425	0.244117	0.676115	0.765506	0.676858	0.71897	0.788173	0.822991	0.732812	0.629568	0.776656	0.313022
0.713367	0.632848	0.551034	0.523695	0.676166	0.543957	0.766988	0.612678	0.658423	0.641478	0.593349	0.646986	0.611372	0.695739	0.713286	0.590818	0.661894	0.627868	0.741475	0.769668	0.81392	0.799258	0.672194	0.674622	0.759357	0.667044	0.81065
0.574352	0.763817	0.618679	0.715521	0.172357	0.697869	0.716825	0.64236	0.700096	0.657765	0.63203	0.707434	0.665555	0.641525	0.157915	0.671732	0.652345	0.619658	0.843603	0.827224	0.751804	0.388689	0.684019	0.775251	0.665374	0.708002	0.773118
0.637258	0.631204	0.64499	0.640607	0.616843	0.714574	0.588722	0.706818	0.615394	0.681567	0.629947	0.671124	0.706214	0.6225	0.19666	0.614484	0.615091	0.685944	0.125331	0.679801	0.642781	0.783497	0.788367	0.729464	0.841119	0.717312	0.737364
WER
25%training data									50%training data									75%training data
Participant1	Participant2	Participant3	Participant4	Participant5	Participant6	Participant7	Participant8	Participant9	Participant1	Participant2	Participant3	Participant4	Participant5	Participant6	Participant7	Participant8	Participant9	Participant1	Participant2	Participant3	Participant4	Participant5	Participant6	Participant7	Participant8	Participant9
1	1	0.666667	0.666667	1	0.666667	0.666667	1	1	0.333333	0.666667	1	0.333333	0.333333	1	0.333333	0.666667	0.666667	0.333333	0	0.333333	0.333333	0	0.333333	0.333333	0.333333	0.333333
0.75	0.75	0.875	0.875	0.75	0.875	0.75	0.875	0.75	0.375	0.5	0.625	0.5	0.5	0.5	0.625	0.5	0.5	0.25	0.375	0.375	0.25	0.25	0.375	0.5	0.25	0.375
0.888889	0.777778	0.777778	0.777778	0.777778	0.888889	0.888889	0.888889	0.888889	0.555556	0.555556	0.666667	0.666667	0.555556	0.555556	0.555556	0.666667	0.555556	0.444444	0.333333	0.333333	0.444444	0.333333	0.222222	0.333333	0.555556	0.333333
0.875	0.875	0.875	0.875	0.875	0.875	0.75	0.875	0.75	0.5	0.625	0.5	0.625	0.625	0.5	0.625	0.625	0.625	0.375	0.25	0.25	0.5	0.375	0.25	0.25	0.375	0.25
1	0.75	0.75	1	0.75	0.75	0.75	1	0.75	0.5	0.75	0.5	0.5	0.5	0.75	0.5	1	0.5	0.5	0.75	0.25	0.75	0.25	0.5	0.25	0.75	0.5
1	1	1	0.75	1	0.75	0.75	0.75	0.75	0.5	0.75	0.5	1	0.75	0.5	0.25	0.5	0.5	0.5	0.5	0	0.5	0.25	0.25	0.25	0.25	0.5
0.857143	0.857143	0.857143	0.857143	0.857143	0.857143	0.857143	0.857143	0.857143	0.714286	0.428571	0.571429	0.714286	0.571429	0.714286	0.714286	0.714286	0.714286	0.571429	0.285714	0.428571	0.428571	0.285714	0.428571	0.571429	0.571429	0.714286
0.777778	0.888889	0.777778	0.888889	0.888889	0.888889	0.888889	0.888889	0.888889	0.555556	0.666667	0.555556	0.666667	0.555556	0.666667	0.555556	0.555556	0.666667	0.333333	0.444444	0.222222	0.333333	0.222222	0.444444	0.333333	0.444444	0.444444
0.857143	0.857143	0.857143	0.857143	0.857143	0.857143	0.714286	0.857143	0.714286	0.714286	0.571429	0.571429	0.571429	0.571429	0.428571	0.571429	0.571429	0.428571	0.428571	0.428571	0.428571	0.428571	0.285714	0.142857	0.285714	0.428571	0.285714
0.75	0.75	1	0.75	0.75	0.75	1	0.75	0.75	0.5	0.5	0.5	0.75	0.5	0.75	0.5	0.5	0.5	0.25	0.25	0.25	0.75	0.25	0.5	0.5	0.5	0
0.857143	0.857143	0.714286	0.857143	0.857143	0.857143	0.714286	0.857143	0.857143	0.428571	0.428571	0.428571	0.714286	0.571429	0.714286	0.571429	0.571429	0.571429	0.285714	0.285714	0.285714	0.428571	0.285714	0.571429	0.285714	0.428571	0.285714
0.75	0.75	0.75	0.75	0.75	1	0.75	0.75	0.75	0.75	0.5	0.5	0.25	0.5	1	0.5	0.25	0.25	0.5	0.25	0.25	0.25	0.25	0.5	0.5	0.25	0.25
0.833333	0.833333	0.833333	0.833333	0.833333	0.833333	1	0.833333	0.833333	0.5	0.5	0.666667	0.5	0.5	0.5	0.666667	0.5	0.666667	0.166667	0.333333	0.333333	0.333333	0.333333	0.166667	0.5	0.333333	0.333333
0.8	0.9	0.9	0.8	0.9	0.8	0.8	0.9	0.8	0.5	0.6	0.5	0.6	0.7	0.6	0.6	0.6	0.5	0.2	0.5	0.4	0.3	0.5	0.4	0.4	0.5	0.3
0.75	0.75	0.75	1	0.75	1	1	0.75	1	0.5	0.5	0.75	0.5	0.5	0.75	0.5	0.5	0.5	0.25	0.25	0.5	0.25	0.5	0.5	0.25	0.5	0.25
0.75	0.75	0.75	1	1	0.75	1	0.75	1	0.5	1	0.5	0.5	0.5	0.5	0.75	0.5	1	0.25	0.25	0.25	0.25	0.25	0.25	0.5	0.25	0.5
0.833333	1	0.833333	0.833333	0.666667	0.833333	0.833333	0.833333	0.833333	1	0.666667	0.666667	0.666667	0.5	0.666667	0.5	0.666667	0.666667	0.666667	0.5	0.333333	0.333333	0.166667	0.5	0.333333	0.5	0.333333
0.8	0.8	0.8	0.9	0.8	0.8	0.9	0.8	0.8	0.6	0.5	0.5	0.6	0.6	0.7	0.6	0.5	0.5	0.3	0.3	0.3	0.4	0.2	0.5	0.4	0.3	0.4
0.833333	0.833333	0.833333	0.833333	0.833333	0.833333	0.833333	0.833333	0.833333	0.666667	0.666667	0.666667	0.5	0.666667	0.666667	0.5	0.5	0.5	0.333333	0.5	0.5	0.333333	0.333333	0.333333	0.333333	0.166667	0.333333
0.833333	0.833333	0.833333	0.833333	0.833333	0.833333	0.833333	0.833333	0.833333	0.5	0.5	0.666667	0.666667	0.5	0.666667	0.333333	0.5	0.5	0.166667	0.333333	0.333333	0.333333	0.333333	0.333333	0.166667	0.333333	0.5
0.75	0.75	1	0.75	0.75	0.75	1	0.75	0.75	0.5	0.5	0.5	0.75	0.5	0.75	0.5	0.5	0.5	0.25	0.25	0.25	0.75	0.25	0.5	0.5	0.5	0
0.75	0.75	0.75	1	0.75	1	1	0.75	1	0.5	0.5	0.75	0.5	0.5	0.75	0.5	0.5	0.5	0.25	0.25	0.5	0.25	0.5	0.5	0.25	0.5	0.25
0.857143	0.857143	0.857143	0.857143	0.857143	0.857143	0.857143	0.857143	0.857143	0.714286	0.428571	0.571429	0.714286	0.571429	0.714286	0.714286	0.714286	0.714286	0.571429	0.285714	0.428571	0.428571	0.285714	0.428571	0.571429	0.571429	0.714286
0.777778	0.888889	0.777778	0.888889	0.888889	0.888889	0.888889	0.888889	0.888889	0.555556	0.666667	0.555556	0.666667	0.555556	0.666667	0.555556	0.555556	0.666667	0.333333	0.444444	0.222222	0.333333	0.222222	0.444444	0.333333	0.444444	0.444444
0.833333	0.833333	0.833333	0.833333	0.833333	0.833333	0.833333	0.833333	0.833333	0.5	0.5	0.666667	0.666667	0.5	0.666667	0.333333	0.5	0.5	0.166667	0.333333	0.333333	0.333333	0.333333	0.333333	0.166667	0.333333	0.5
0.833333	1	0.833333	0.833333	0.666667	0.833333	0.833333	0.833333	0.833333	1	0.666667	0.666667	0.666667	0.5	0.666667	0.5	0.666667	0.666667	0.666667	0.5	0.333333	0.333333	0.166667	0.5	0.333333	0.5	0.333333
0.8	0.8	0.8	0.9	0.8	0.8	0.9	0.8	0.8	0.6	0.5	0.5	0.6	0.6	0.7	0.6	0.5	0.5	0.3	0.3	0.3	0.4	0.2	0.5	0.4	0.3	0.4
1	1	1	0.75	1	0.75	0.75	0.75	0.75	0.5	0.75	0.5	1	0.75	0.5	0.25	0.5	0.5	0.5	0.5	0	0.5	0.25	0.25	0.25	0.25	0.5
0.8	0.9	0.9	0.8	0.9	0.8	0.8	0.9	0.8	0.5	0.6	0.5	0.6	0.7	0.6	0.6	0.6	0.5	0.2	0.5	0.4	0.3	0.5	0.4	0.4	0.5	0.3
0.75	0.75	0.75	1	1	0.75	1	0.75	1	0.5	1	0.5	0.5	0.5	0.5	0.75	0.5	1	0.25	0.25	0.25	0.25	0.25	0.25	0.5	0.25	0.5
0.857143	0.857143	0.714286	0.857143	0.857143	0.857143	0.714286	0.857143	0.857143	0.428571	0.428571	0.428571	0.714286	0.571429	0.714286	0.571429	0.571429	0.571429	0.285714	0.285714	0.285714	0.428571	0.285714	0.571429	0.285714	0.428571	0.285714
0.875	0.875	0.875	0.875	0.875	0.875	0.75	0.875	0.75	0.5	0.625	0.5	0.625	0.625	0.5	0.625	0.625	0.625	0.375	0.25	0.25	0.5	0.375	0.25	0.25	0.375	0.25
0.75	0.75	0.875	0.875	0.75	0.875	0.75	0.875	0.75	0.375	0.5	0.625	0.5	0.5	0.5	0.625	0.5	0.5	0.25	0.375	0.375	0.25	0.25	0.375	0.5	0.25	0.375
1	0.75	0.75	1	0.75	0.75	0.75	1	0.75	0.5	0.75	0.5	0.5	0.5	0.75	0.5	1	0.5	0.5	0.75	0.25	0.75	0.25	0.5	0.25	0.75	0.5
0.857143	0.857143	0.857143	0.857143	0.857143	0.857143	0.714286	0.857143	0.714286	0.714286	0.571429	0.571429	0.571429	0.571429	0.428571	0.571429	0.571429	0.428571	0.428571	0.428571	0.428571	0.428571	0.285714	0.142857	0.285714	0.428571	0.285714
0.75	0.75	0.75	0.75	0.75	1	0.75	0.75	0.75	0.75	0.5	0.5	0.25	0.5	1	0.5	0.25	0.25	0.5	0.25	0.25	0.25	0.25	0.5	0.5	0.25	0.25
0.888889	0.777778	0.777778	0.777778	0.777778	0.888889	0.888889	0.888889	0.888889	0.555556	0.555556	0.666667	0.666667	0.555556	0.555556	0.555556	0.666667	0.555556	0.444444	0.333333	0.333333	0.444444	0.333333	0.222222	0.333333	0.555556	0.333333
1	1	0.666667	0.666667	1	0.666667	0.666667	1	1	0.333333	0.666667	1	0.333333	0.333333	1	0.333333	0.666667	0.666667	0.333333	0	0.333333	0.333333	0	0.333333	0.333333	0.333333	0.333333
0.833333	0.833333	0.833333	0.833333	0.833333	0.833333	1	0.833333	0.833333	0.5	0.5	0.666667	0.5	0.5	0.5	0.666667	0.5	0.666667	0.166667	0.333333	0.333333	0.333333	0.333333	0.166667	0.5	0.333333	0.333333
0.833333	0.833333	0.833333	0.833333	0.833333	0.833333	0.833333	0.833333	0.833333	0.666667	0.666667	0.666667	0.5	0.666667	0.666667	0.5	0.5	0.5	0.333333	0.5	0.5	0.333333	0.333333	0.333333	0.333333	0.166667	0.333333
0.833333	0.833333	0.833333	0.833333	0.833333	0.833333	0.833333	0.833333	0.833333	0.5	0.5	0.666667	0.666667	0.5	0.666667	0.333333	0.5	0.5	0.166667	0.333333	0.333333	0.333333	0.333333	0.333333	0.166667	0.333333	0.5
0.875	0.875	0.875	0.875	0.875	0.875	0.75	0.875	0.75	0.5	0.625	0.5	0.625	0.625	0.5	0.625	0.625	0.625	0.375	0.25	0.25	0.5	0.375	0.25	0.25	0.375	0.25
0.857143	0.857143	0.857143	0.857143	0.857143	0.857143	0.714286	0.857143	0.714286	0.714286	0.571429	0.571429	0.571429	0.571429	0.428571	0.571429	0.571429	0.428571	0.428571	0.428571	0.428571	0.428571	0.285714	0.142857	0.285714	0.428571	0.285714
0.8	0.8	0.8	0.9	0.8	0.8	0.9	0.8	0.8	0.6	0.5	0.5	0.6	0.6	0.7	0.6	0.5	0.5	0.3	0.3	0.3	0.4	0.2	0.5	0.4	0.3	0.4
0.75	0.75	1	0.75	0.75	0.75	1	0.75	0.75	0.5	0.5	0.5	0.75	0.5	0.75	0.5	0.5	0.5	0.25	0.25	0.25	0.75	0.25	0.5	0.5	0.5	0
0.833333	0.833333	0.833333	0.833333	0.833333	0.833333	1	0.833333	0.833333	0.5	0.5	0.666667	0.5	0.5	0.5	0.666667	0.5	0.666667	0.166667	0.333333	0.333333	0.333333	0.333333	0.166667	0.5	0.333333	0.333333
1	1	1	0.75	1	0.75	0.75	0.75	0.75	0.5	0.75	0.5	1	0.75	0.5	0.25	0.5	0.5	0.5	0.5	0	0.5	0.25	0.25	0.25	0.25	0.5
0.75	0.75	0.75	1	0.75	1	1	0.75	1	0.5	0.5	0.75	0.5	0.5	0.75	0.5	0.5	0.5	0.25	0.25	0.5	0.25	0.5	0.5	0.25	0.5	0.25
0.857143	0.857143	0.857143	0.857143	0.857143	0.857143	0.857143	0.857143	0.857143	0.714286	0.428571	0.571429	0.714286	0.571429	0.714286	0.714286	0.714286	0.714286	0.571429	0.285714	0.428571	0.428571	0.285714	0.428571	0.571429	0.571429	0.714286
0.8	0.9	0.9	0.8	0.9	0.8	0.8	0.9	0.8	0.5	0.6	0.5	0.6	0.7	0.6	0.6	0.6	0.5	0.2	0.5	0.4	0.3	0.5	0.4	0.4	0.5	0.3
0.857143	0.857143	0.714286	0.857143	0.857143	0.857143	0.714286	0.857143	0.857143	0.428571	0.428571	0.428571	0.714286	0.571429	0.714286	0.571429	0.571429	0.571429	0.285714	0.285714	0.285714	0.428571	0.285714	0.571429	0.285714	0.428571	0.285714
0.75	0.75	0.75	0.75	0.75	1	0.75	0.75	0.75	0.75	0.5	0.5	0.25	0.5	1	0.5	0.25	0.25	0.5	0.25	0.25	0.25	0.25	0.5	0.5	0.25	0.25
1	1	0.666667	0.666667	1	0.666667	0.666667	1	1	0.333333	0.666667	1	0.333333	0.333333	1	0.333333	0.666667	0.666667	0.333333	0	0.333333	0.333333	0	0.333333	0.333333	0.333333	0.333333
0.833333	0.833333	0.833333	0.833333	0.833333	0.833333	0.833333	0.833333	0.833333	0.666667	0.666667	0.666667	0.5	0.666667	0.666667	0.5	0.5	0.5	0.333333	0.5	0.5	0.333333	0.333333	0.333333	0.333333	0.166667	0.333333
0.833333	1	0.833333	0.833333	0.666667	0.833333	0.833333	0.833333	0.833333	1	0.666667	0.666667	0.666667	0.5	0.666667	0.5	0.666667	0.666667	0.666667	0.5	0.333333	0.333333	0.166667	0.5	0.333333	0.5	0.333333
1	0.75	0.75	1	0.75	0.75	0.75	1	0.75	0.5	0.75	0.5	0.5	0.5	0.75	0.5	1	0.5	0.5	0.75	0.25	0.75	0.25	0.5	0.25	0.75	0.5
0.888889	0.777778	0.777778	0.777778	0.777778	0.888889	0.888889	0.888889	0.888889	0.555556	0.555556	0.666667	0.666667	0.555556	0.555556	0.555556	0.666667	0.555556	0.444444	0.333333	0.333333	0.444444	0.333333	0.222222	0.333333	0.555556	0.333333
0.777778	0.888889	0.777778	0.888889	0.888889	0.888889	0.888889	0.888889	0.888889	0.555556	0.666667	0.555556	0.666667	0.555556	0.666667	0.555556	0.555556	0.666667	0.333333	0.444444	0.222222	0.333333	0.222222	0.444444	0.333333	0.444444	0.444444
0.75	0.75	0.875	0.875	0.75	0.875	0.75	0.875	0.75	0.375	0.5	0.625	0.5	0.5	0.5	0.625	0.5	0.5	0.25	0.375	0.375	0.25	0.25	0.375	0.5	0.25	0.375
0.75	0.75	0.75	1	1	0.75	1	0.75	1	0.5	1	0.5	0.5	0.5	0.5	0.75	0.5	1	0.25	0.25	0.25	0.25	0.25	0.25	0.5	0.25	0.5
PER
25%training data									50%training data									75%training data
Participant1	Participant2	Participant3	Participant4	Participant5	Participant6	Participant7	Participant8	Participant9	Participant1	Participant2	Participant3	Participant4	Participant5	Participant6	Participant7	Participant8	Participant9	Participant1	Participant2	Participant3	Participant4	Participant5	Participant6	Participant7	Participant8	Participant9
0.583333	0.666667	0.666667	0.583333	0.666667	0.666667	0.583333	0.75	0.666667	0.333333	0.333333	0.5	0.333333	0.416667	0.333333	0.333333	0.5	0.333333	0.25	0.166667	0.333333	0.25	0.166667	0.25	0.25	0.416667	0.25
0.65625	0.65625	0.65625	0.65625	0.65625	0.65625	0.65625	0.65625	0.65625	0.40625	0.40625	0.4375	0.40625	0.40625	0.4375	0.4375	0.40625	0.40625	0.21875	0.21875	0.28125	0.21875	0.28125	0.28125	0.28125	0.28125	0.25
0.69697	0.666667	0.666667	0.757576	0.69697	0.666667	0.69697	0.69697	0.69697	0.454545	0.393939	0.454545	0.575758	0.454545	0.424242	0.545455	0.484848	0.484848	0.333333	0.242424	0.30303	0.454545	0.333333	0.30303	0.424242	0.363636	0.333333
0.677419	0.645161	0.677419	0.677419	0.709677	0.677419	0.677419	0.645161	0.645161	0.419355	0.419355	0.419355	0.451613	0.516129	0.419355	0.483871	0.419355	0.419355	0.290323	0.258065	0.258065	0.322581	0.387097	0.258065	0.322581	0.290323	0.258065
0.714286	0.714286	0.666667	0.761905	0.619048	0.666667	0.714286	0.809524	0.714286	0.52381	0.47619	0.428571	0.571429	0.380952	0.428571	0.47619	0.619048	0.52381	0.380952	0.380952	0.285714	0.47619	0.238095	0.333333	0.333333	0.52381	0.428571
0.764706	0.764706	0.647059	0.705882	0.764706	0.647059	0.647059	0.647059	0.705882	0.588235	0.647059	0.352941	0.529412	0.588235	0.411765	0.411765	0.411765	0.470588	0.470588	0.529412	0.176471	0.352941	0.470588	0.235294	0.235294	0.235294	0.352941
0.730769	0.653846	0.692308	0.730769	0.653846	0.692308	0.730769	0.730769	0.807692	0.576923	0.461538	0.5	0.576923	0.461538	0.5	0.5	0.576923	0.653846	0.461538	0.269231	0.346154	0.423077	0.307692	0.346154	0.346154	0.423077	0.538462
0.625	0.65625	0.625	0.65625	0.65625	0.71875	0.71875	0.71875	0.71875	0.40625	0.4375	0.375	0.46875	0.40625	0.53125	0.46875	0.5	0.53125	0.25	0.28125	0.21875	0.3125	0.25	0.40625	0.34375	0.34375	0.40625
0.69697	0.666667	0.666667	0.69697	0.666667	0.636364	0.666667	0.666667	0.636364	0.454545	0.484848	0.424242	0.484848	0.454545	0.393939	0.393939	0.424242	0.393939	0.333333	0.333333	0.272727	0.363636	0.30303	0.242424	0.242424	0.272727	0.212121
0.733333	0.666667	0.666667	0.666667	0.666667	0.733333	0.733333	0.733333	0.6	0.466667	0.4	0.333333	0.533333	0.333333	0.6	0.533333	0.466667	0.4	0.333333	0.2	0.2	0.333333	0.266667	0.466667	0.4	0.4	0.2
0.666667	0.666667	0.666667	0.708333	0.666667	0.75	0.666667	0.708333	0.666667	0.416667	0.458333	0.416667	0.5	0.458333	0.583333	0.458333	0.541667	0.416667	0.25	0.291667	0.208333	0.375	0.333333	0.5	0.25	0.416667	0.291667
0.7	0.65	0.6	0.65	0.65	0.7	0.65	0.6	0.6	0.45	0.45	0.4	0.35	0.4	0.45	0.45	0.4	0.35	0.25	0.25	0.2	0.2	0.25	0.35	0.3	0.2	0.25
0.655172	0.62069	0.655172	0.655172	0.655172	0.655172	0.724138	0.655172	0.689655	0.37931	0.37931	0.448276	0.413793	0.413793	0.37931	0.551724	0.413793	0.448276	0.206897	0.241379	0.241379	0.241379	0.275862	0.206897	0.448276	0.275862	0.310345
0.625	0.6875	0.6875	0.6875	0.71875	0.6875	0.71875	0.71875	0.65625	0.375	0.5	0.46875	0.4375	0.53125	0.46875	0.5	0.5	0.40625	0.25	0.34375	0.3125	0.3125	0.40625	0.34375	0.34375	0.375	0.25
0.642857	0.642857	0.785714	0.714286	0.642857	0.785714	0.642857	0.714286	0.642857	0.357143	0.428571	0.5	0.5	0.5	0.642857	0.428571	0.5	0.357143	0.214286	0.214286	0.428571	0.357143	0.357143	0.5	0.214286	0.357143	0.214286
0.625	0.625	0.625	0.6875	0.625	0.625	0.75	0.625	0.75	0.375	0.375	0.375	0.5	0.375	0.375	0.5625	0.4375	0.5625	0.1875	0.25	0.1875	0.375	0.1875	0.25	0.4375	0.1875	0.4375
0.8	0.75	0.65	0.6	0.65	0.75	0.65	0.75	0.65	0.65	0.5	0.4	0.4	0.4	0.6	0.4	0.5	0.45	0.55	0.35	0.3	0.2	0.25	0.45	0.25	0.4	0.3
0.666667	0.636364	0.666667	0.69697	0.69697	0.787879	0.727273	0.666667	0.69697	0.424242	0.393939	0.424242	0.454545	0.454545	0.606061	0.515152	0.424242	0.484848	0.242424	0.242424	0.272727	0.333333	0.30303	0.484848	0.393939	0.272727	0.333333
0.681818	0.727273	0.681818	0.636364	0.681818	0.636364	0.681818	0.636364	0.681818	0.409091	0.5	0.409091	0.409091	0.409091	0.454545	0.454545	0.409091	0.409091	0.272727	0.363636	0.272727	0.227273	0.272727	0.272727	0.272727	0.227273	0.272727
0.647059	0.647059	0.705882	0.764706	0.705882	0.705882	0.647059	0.705882	0.823529	0.352941	0.411765	0.470588	0.588235	0.470588	0.411765	0.352941	0.470588	0.647059	0.176471	0.235294	0.294118	0.470588	0.352941	0.294118	0.235294	0.352941	0.588235
0.65625	0.65625	0.65625	0.65625	0.65625	0.65625	0.65625	0.65625	0.65625	0.40625	0.40625	0.4375	0.40625	0.40625	0.4375	0.4375	0.40625	0.40625	0.21875	0.21875	0.28125	0.21875	0.28125	0.28125	0.28125	0.28125	0.25
0.7	0.65	0.6	0.65	0.65	0.7	0.65	0.6	0.6	0.45	0.45	0.4	0.35	0.4	0.45	0.45	0.4	0.35	0.25	0.25	0.2	0.2	0.25	0.35	0.3	0.2	0.25
0.714286	0.714286	0.666667	0.761905	0.619048	0.666667	0.714286	0.809524	0.714286	0.52381	0.47619	0.428571	0.571429	0.380952	0.428571	0.47619	0.619048	0.52381	0.380952	0.380952	0.285714	0.47619	0.238095	0.333333	0.333333	0.52381	0.428571
0.730769	0.653846	0.692308	0.730769	0.653846	0.692308	0.730769	0.730769	0.807692	0.576923	0.461538	0.5	0.576923	0.461538	0.5	0.5	0.576923	0.653846	0.461538	0.269231	0.346154	0.423077	0.307692	0.346154	0.346154	0.423077	0.538462
0.69697	0.666667	0.666667	0.69697	0.666667	0.636364	0.666667	0.666667	0.636364	0.454545	0.484848	0.424242	0.484848	0.454545	0.393939	0.393939	0.424242	0.393939	0.333333	0.333333	0.272727	0.363636	0.30303	0.242424	0.242424	0.272727	0.212121
0.625	0.6875	0.6875	0.6875	0.71875	0.6875	0.71875	0.71875	0.65625	0.375	0.5	0.46875	0.4375	0.53125	0.46875	0.5	0.5	0.40625	0.25	0.34375	0.3125	0.3125	0.40625	0.34375	0.34375	0.375	0.25
0.625	0.625	0.625	0.6875	0.625	0.625	0.75	0.625	0.75	0.375	0.375	0.375	0.5	0.375	0.375	0.5625	0.4375	0.5625	0.1875	0.25	0.1875	0.375	0.1875	0.25	0.4375	0.1875	0.4375
0.733333	0.666667	0.666667	0.666667	0.666667	0.733333	0.733333	0.733333	0.6	0.466667	0.4	0.333333	0.533333	0.333333	0.6	0.533333	0.466667	0.4	0.333333	0.2	0.2	0.333333	0.266667	0.466667	0.4	0.4	0.2
0.69697	0.666667	0.666667	0.757576	0.69697	0.666667	0.69697	0.69697	0.69697	0.454545	0.393939	0.454545	0.575758	0.454545	0.424242	0.545455	0.484848	0.484848	0.333333	0.242424	0.30303	0.454545	0.333333	0.30303	0.424242	0.363636	0.333333
0.8	0.75	0.65	0.6	0.65	0.75	0.65	0.75	0.65	0.65	0.5	0.4	0.4	0.4	0.6	0.4	0.5	0.45	0.55	0.35	0.3	0.2	0.25	0.45	0.25	0.4	0.3
0.764706	0.764706	0.647059	0.705882	0.764706	0.647059	0.647059	0.647059	0.705882	0.588235	0.647059	0.352941	0.529412	0.588235	0.411765	0.411765	0.411765	0.470588	0.470588	0.529412	0.176471	0.352941	0.470588	0.235294	0.235294	0.235294	0.352941
0.625	0.65625	0.625	0.65625	0.65625	0.71875	0.71875	0.71875	0.71875	0.40625	0.4375	0.375	0.46875	0.40625	0.53125	0.46875	0.5	0.53125	0.25	0.28125	0.21875	0.3125	0.25	0.40625	0.34375	0.34375	0.40625
0.677419	0.645161	0.677419	0.677419	0.709677	0.677419	0.677419	0.645161	0.645161	0.419355	0.419355	0.419355	0.451613	0.516129	0.419355	0.483871	0.419355	0.419355	0.290323	0.258065	0.258065	0.322581	0.387097	0.258065	0.322581	0.290323	0.258065
0.655172	0.62069	0.655172	0.655172	0.655172	0.655172	0.724138	0.655172	0.689655	0.37931	0.37931	0.448276	0.413793	0.413793	0.37931	0.551724	0.413793	0.448276	0.206897	0.241379	0.241379	0.241379	0.275862	0.206897	0.448276	0.275862	0.310345
0.583333	0.666667	0.666667	0.583333	0.666667	0.666667	0.583333	0.75	0.666667	0.333333	0.333333	0.5	0.333333	0.416667	0.333333	0.333333	0.5	0.333333	0.25	0.166667	0.333333	0.25	0.166667	0.25	0.25	0.416667	0.25
0.642857	0.642857	0.785714	0.714286	0.642857	0.785714	0.642857	0.714286	0.642857	0.357143	0.428571	0.5	0.5	0.5	0.642857	0.428571	0.5	0.357143	0.214286	0.214286	0.428571	0.357143	0.357143	0.5	0.214286	0.357143	0.214286
0.681818	0.727273	0.681818	0.636364	0.681818	0.636364	0.681818	0.636364	0.681818	0.409091	0.5	0.409091	0.409091	0.409091	0.454545	0.454545	0.409091	0.409091	0.272727	0.363636	0.272727	0.227273	0.272727	0.272727	0.272727	0.227273	0.272727
0.666667	0.666667	0.666667	0.708333	0.666667	0.75	0.666667	0.708333	0.666667	0.416667	0.458333	0.416667	0.5	0.458333	0.583333	0.458333	0.541667	0.416667	0.25	0.291667	0.208333	0.375	0.333333	0.5	0.25	0.416667	0.291667
0.647059	0.647059	0.705882	0.764706	0.705882	0.705882	0.647059	0.705882	0.823529	0.352941	0.411765	0.470588	0.588235	0.470588	0.411765	0.352941	0.470588	0.647059	0.176471	0.235294	0.294118	0.470588	0.352941	0.294118	0.235294	0.352941	0.588235
0.666667	0.636364	0.666667	0.69697	0.69697	0.787879	0.727273	0.666667	0.69697	0.424242	0.393939	0.424242	0.454545	0.454545	0.606061	0.515152	0.424242	0.484848	0.242424	0.242424	0.272727	0.333333	0.30303	0.484848	0.393939	0.272727	0.333333
0.666667	0.636364	0.666667	0.69697	0.69697	0.787879	0.727273	0.666667	0.69697	0.424242	0.393939	0.424242	0.454545	0.454545	0.606061	0.515152	0.424242	0.484848	0.242424	0.242424	0.272727	0.333333	0.30303	0.484848	0.393939	0.272727	0.333333
0.733333	0.666667	0.666667	0.666667	0.666667	0.733333	0.733333	0.733333	0.6	0.466667	0.4	0.333333	0.533333	0.333333	0.6	0.533333	0.466667	0.4	0.333333	0.2	0.2	0.333333	0.266667	0.466667	0.4	0.4	0.2
0.655172	0.62069	0.655172	0.655172	0.655172	0.655172	0.724138	0.655172	0.689655	0.37931	0.37931	0.448276	0.413793	0.413793	0.37931	0.551724	0.413793	0.448276	0.206897	0.241379	0.241379	0.241379	0.275862	0.206897	0.448276	0.275862	0.310345
0.647059	0.647059	0.705882	0.764706	0.705882	0.705882	0.647059	0.705882	0.823529	0.352941	0.411765	0.470588	0.588235	0.470588	0.411765	0.352941	0.470588	0.647059	0.176471	0.235294	0.294118	0.470588	0.352941	0.294118	0.235294	0.352941	0.588235
0.625	0.625	0.625	0.6875	0.625	0.625	0.75	0.625	0.75	0.375	0.375	0.375	0.5	0.375	0.375	0.5625	0.4375	0.5625	0.1875	0.25	0.1875	0.375	0.1875	0.25	0.4375	0.1875	0.4375
0.642857	0.642857	0.785714	0.714286	0.642857	0.785714	0.642857	0.714286	0.642857	0.357143	0.428571	0.5	0.5	0.5	0.642857	0.428571	0.5	0.357143	0.214286	0.214286	0.428571	0.357143	0.357143	0.5	0.214286	0.357143	0.214286
0.65625	0.65625	0.65625	0.65625	0.65625	0.65625	0.65625	0.65625	0.65625	0.40625	0.40625	0.4375	0.40625	0.40625	0.4375	0.4375	0.40625	0.40625	0.21875	0.21875	0.28125	0.21875	0.28125	0.28125	0.28125	0.28125	0.25
0.69697	0.666667	0.666667	0.69697	0.666667	0.636364	0.666667	0.666667	0.636364	0.454545	0.484848	0.424242	0.484848	0.454545	0.393939	0.393939	0.424242	0.393939	0.333333	0.333333	0.272727	0.363636	0.30303	0.242424	0.242424	0.272727	0.212121
0.730769	0.653846	0.692308	0.730769	0.653846	0.692308	0.730769	0.730769	0.807692	0.576923	0.461538	0.5	0.576923	0.461538	0.5	0.5	0.576923	0.653846	0.461538	0.269231	0.346154	0.423077	0.307692	0.346154	0.346154	0.423077	0.538462
0.625	0.6875	0.6875	0.6875	0.71875	0.6875	0.71875	0.71875	0.65625	0.375	0.5	0.46875	0.4375	0.53125	0.46875	0.5	0.5	0.40625	0.25	0.34375	0.3125	0.3125	0.40625	0.34375	0.34375	0.375	0.25
0.7	0.65	0.6	0.65	0.65	0.7	0.65	0.6	0.6	0.45	0.45	0.4	0.35	0.4	0.45	0.45	0.4	0.35	0.25	0.25	0.2	0.2	0.25	0.35	0.3	0.2	0.25
0.625	0.65625	0.625	0.65625	0.65625	0.71875	0.71875	0.71875	0.71875	0.40625	0.4375	0.375	0.46875	0.40625	0.53125	0.46875	0.5	0.53125	0.25	0.28125	0.21875	0.3125	0.25	0.40625	0.34375	0.34375	0.40625
0.69697	0.666667	0.666667	0.757576	0.69697	0.666667	0.69697	0.69697	0.69697	0.454545	0.393939	0.454545	0.575758	0.454545	0.424242	0.545455	0.484848	0.484848	0.333333	0.242424	0.30303	0.454545	0.333333	0.30303	0.424242	0.363636	0.333333
0.8	0.75	0.65	0.6	0.65	0.75	0.65	0.75	0.65	0.65	0.5	0.4	0.4	0.4	0.6	0.4	0.5	0.45	0.55	0.35	0.3	0.2	0.25	0.45	0.25	0.4	0.3
0.714286	0.714286	0.666667	0.761905	0.619048	0.666667	0.714286	0.809524	0.714286	0.52381	0.47619	0.428571	0.571429	0.380952	0.428571	0.47619	0.619048	0.52381	0.380952	0.380952	0.285714	0.47619	0.238095	0.333333	0.333333	0.52381	0.428571
0.666667	0.666667	0.666667	0.708333	0.666667	0.75	0.666667	0.708333	0.666667	0.416667	0.458333	0.416667	0.5	0.458333	0.583333	0.458333	0.541667	0.416667	0.25	0.291667	0.208333	0.375	0.333333	0.5	0.25	0.416667	0.291667
0.677419	0.645161	0.677419	0.677419	0.709677	0.677419	0.677419	0.645161	0.645161	0.419355	0.419355	0.419355	0.451613	0.516129	0.419355	0.483871	0.419355	0.419355	0.290323	0.258065	0.258065	0.322581	0.387097	0.258065	0.322581	0.290323	0.258065
0.764706	0.764706	0.647059	0.705882	0.764706	0.647059	0.647059	0.647059	0.705882	0.588235	0.647059	0.352941	0.529412	0.588235	0.411765	0.411765	0.411765	0.470588	0.470588	0.529412	0.176471	0.352941	0.470588	0.235294	0.235294	0.235294	0.352941
0.681818	0.727273	0.681818	0.636364	0.681818	0.636364	0.681818	0.636364	0.681818	0.409091	0.5	0.409091	0.409091	0.409091	0.454545	0.454545	0.409091	0.409091	0.272727	0.363636	0.272727	0.227273	0.272727	0.272727	0.272727	0.227273	0.272727
0.583333	0.666667	0.666667	0.583333	0.666667	0.666667	0.583333	0.75	0.666667	0.333333	0.333333	0.5	0.333333	0.416667	0.333333	0.333333	0.5	0.333333	0.25	0.166667	0.333333	0.25	0.166667	0.25	0.25	0.416667	0.25

## Sheet: figS5
acoustic_pathway	mask1	mask2	maskall
91.1455	56.38	63.35	57.35
86.1219	72.96	76.03	72.63
76.9119	73.07	74.26	71.19
93.6574	69.04	69.27	66.3
71.8882	65.6	67.07	60.92
76.9119	64.45	65.78	64.24
89.471	64.79	61.53	59.02
85.2846	69.35	66.94	64.78
87.7964	68.06	69.26	66.66
86.9592	59.06	58.7	57.99
82.7728	60	62.36	57.32
90.3083	67.35	67.04	65.1
81.0982	63.72	63.03	62.2
91.1455	70.43	71.38	69.72
91.9828	57.22	65.65	60.63
91.9828	69.42	67.6	66.84
86.1219	74.43	73.32	72.25
86.9592	70.08	67.53	64.75
92.8201	63.7	63.69	62.45
88.6337	65.99	65.4	61.78
83.6101	73.5859	71.4471	64.5054
94.4946	64.9482	65.3826	67.406
74.4	56.2119	58.9873	57.24
20.8144	69.4384	66.6528	71.7946
90.3083	65.8604	66.0257	62.9557
91.1455	56.7347	67.1721	70.389
89.471	63.3885	62.196	65.0204
89.471	67.5473	74.4466	60.4462
86.9592	69.9848	67.4157	72.2786
89.471	68.9893	75.3931	61.6672
84.4473	59.9007	69.8649	62.3181
63.5154	63.1263	65.7606	65.9847
69.3764	70.6444	69.2417	64.9132
82.7728	69.6542	63.6083	58.235
83.6101	59.0492	73.242	66.289
94.4946	65.5859	67.2685	56.9112
93.6574	64.2408	63.3608	70.9005
62.6782	75.0255	63.0436	60.4103
87.7964	67.1739	61.9209	58.9305
96.1692	72.3927	67.3347	64.2501
63.5154	68.4017	70.7513	62.7618
88.6337	56.8143	63.5806	61.4321
89.471	71.0122	66.9814	66.242
85.2846	68.4632	61.8255	60.9184
85.2846	72.3744	67.069	57.0852
72.7255	63.3966	64.8725	64.6501
88.6337	69.8492	69.7108	57.3749
91.1455	59.2723	66.0669	62.327
92.8201	64.319	74.5904	72.1311
86.9592	57.4732	63.244	73.3317
81.9355	63.2189	58.8874	63.9849
86.9592	67.5571	65.8045	65.0405
87.7964	69.3419	62.112	65.3166
89.471	69.8074	67.7312	62.4989
93.6574	74.7501	76.4867	59.2538
80.261	64.9704	69.196	58.1831
87.7964	73.6413	66.8495	66.2309
66.0273	65.3824	63.4401	65.8067
94.4946	60.2385	66.5113	71.9006
86.9592	65.5912	72.7821	69.2614
